# Supplementary material for: Pd(ii)-Catalyzed atroposelective C–H olefination: synthesis of enantioenriched N-aryl peptoid atropisomers
Source: Royal Society of Chemistry journal article supplement (doi:10.1039/d3cc04425d), 2023-01-01
Supplement: d3cc04425d1.pdf [file d3cc04425d1.pdf]

## Supporting Information

### **Pd(II)-Catalyzed Atroposelective C–H Olefination: Synthesis of Enantioenriched *N*-Aryl Peptoid Atropisomers**

Tian-Yu Jiang,<sup>a</sup> Yi-Ting Ke,<sup>a</sup> Yong-Jie Wu,<sup>a</sup> Qi-Jun Yao,<sup>a,\*</sup> Bing-Feng Shi<sup>a,b,c,d\*</sup>

<sup>a</sup>Department of Chemistry, Zhejiang University, Hangzhou, Zhejiang, 310027, China

<sup>b</sup>School of Biotechnology and Health Sciences, Wuyi University, Jiangmen, Guangdong 529020, China

<sup>c</sup>Green Catalysis Center and College of Chemistry, Zhengzhou University, Zhengzhou, 450001, China

<sup>d</sup> College of Biological, Chemical Science and Engineering, Jiaxing University, Jiaxing 314001, China

\*E-mail: 3110000156@zju.edu.cn (Q.J. Yao), bfshi@zju.edu.cn (B.F. Shi).

### Table of Contents

|                                                                                   |    |
|-----------------------------------------------------------------------------------|----|
| 1. General Information.....                                                       | 2  |
| 2. Experimental Section and Characterization Data .....                           | 3  |
| 2.1 Preparation of Substrates.....                                                | 3  |
| 2.2 Optimization of Reaction Conditions.....                                      | 5  |
| 2.3 General Procedures for Pd(II)-Catalyzed Atroposelective C-H Olefination ..... | 6  |
| 2.4 Gram-Scale Synthesis .....                                                    | 33 |
| 3. References.....                                                                | 34 |
| 4. NMR Spectra.....                                                               | 35 |
| 5. Copies of HPLC Analysis .....                                                  | 73 |

## 1. General Information

All the materials and solvents were purchased from commercial suppliers and used without additional purification. Pd(OAc)<sub>2</sub> was purchased from Laajoo (China). NMR spectra were recorded on a Bruke Avance operating for <sup>1</sup>H NMR at 400 MHz, <sup>13</sup>C NMR at 101 MHz, <sup>19</sup>F NMR at 376 MHz using TMS as internal standard. The peaks were internally referenced to residual undeuterated chloroform in CDCl<sub>3</sub> (δ H = 7.26 ppm, δ C = 77.16 ppm). The following abbreviations (or combinations thereof) were used to explain multiplicities: s = singlet, d = doublet, t = triplet, q = quartet, m = multiplet. Melting points were determined using an INESA WRS-1B melting point apparatus. Mass spectroscopy data of the products were collected on an HRMS-TOF instrument. The ee value was determined on Shimadzu HPLC using CHIRALPAK column with hexane and 2-propanol as eluent, Wavelength = 254 nm.

## 2. Experimental Section and Characterization Data

### 2.1 Preparation of Substrates

#### General Procedure A (Ugi reaction) for the Preparation of Compound 1a-1v

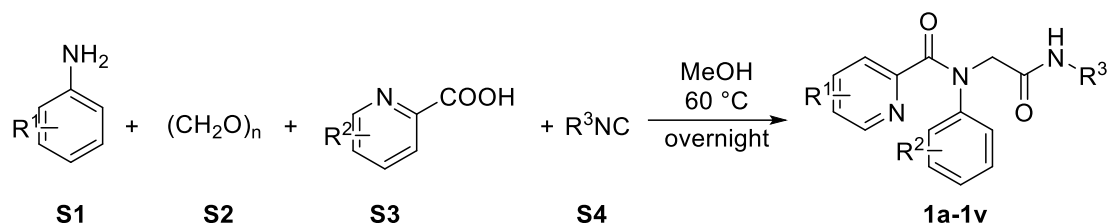

To a solution of the amine (**S1**) (5.0 mmol, 1.0 equiv) in methanol (10 mL, 0.5 M) was added paraformaldehyde (**S2**) (1.2 equiv). After being stirred for 1h at room temperature, picolinic acid (**S3**) (1.2 equiv) and isocyanide (**S4**) (1.2 equiv) was added. The mixture was then stirred overnight at 60 °C under air followed by cooling. The resulting mixture was filtered through a celite pad and concentrated in vacuo. The residue was purified by silica gel column chromatography to afford the product.<sup>[1]</sup>

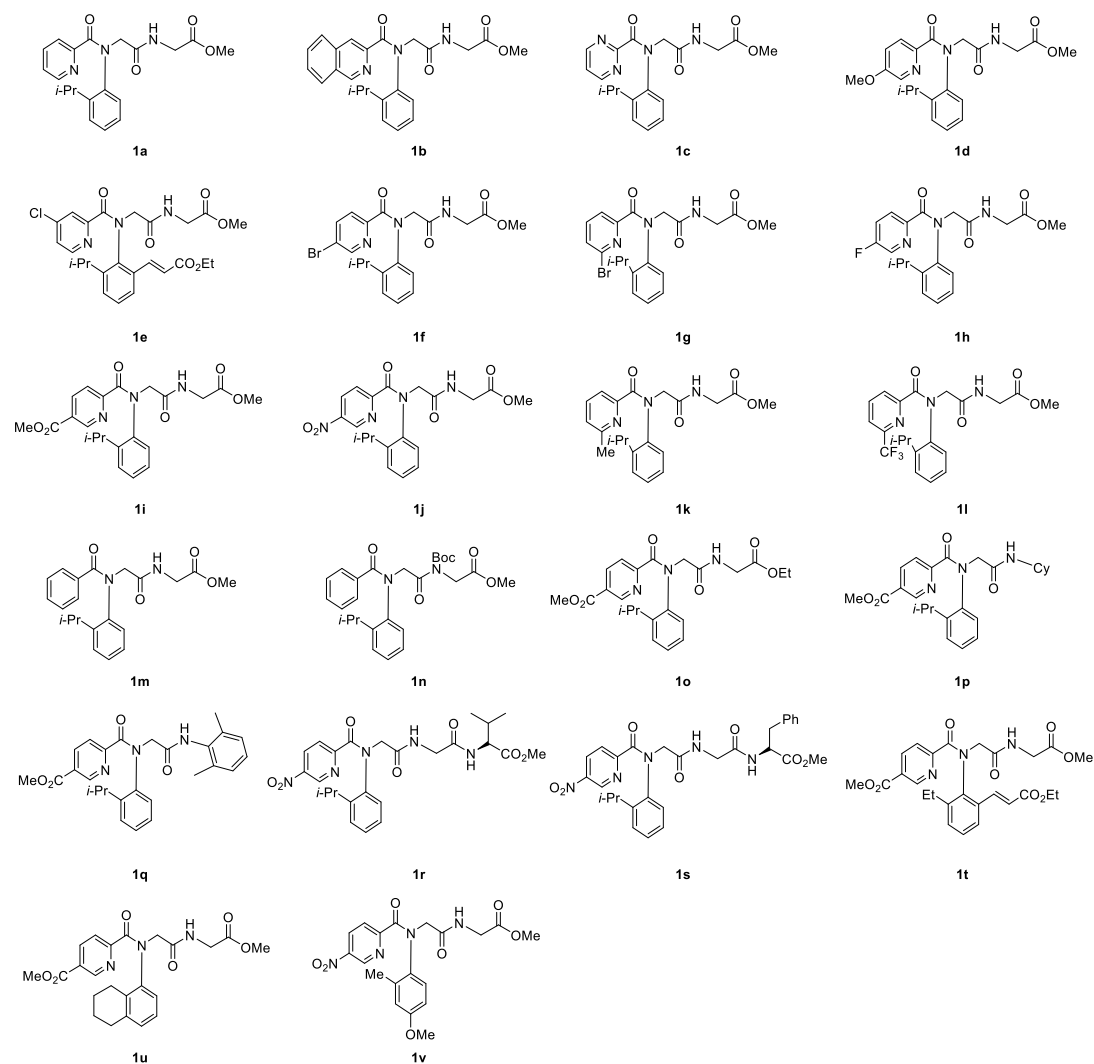

## Scheme S1. *N*-aryl Peptoids

Substrates **1a-1j**, **1m-1v** are known compounds.<sup>[1]</sup>

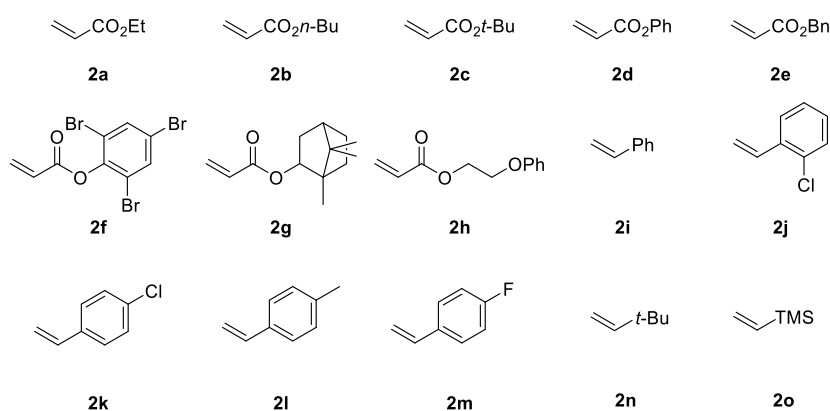

## Scheme S2. Olefins

Olefins **2a-2o** are commercially available.

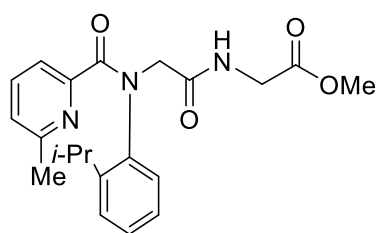

### **Methyl *N*-(2-isopropylphenyl)-*N*-(6-methylpicolinoyl)glycylglycinate (**1k**)**

The title compound **1k** was prepared according to the general procedure A and was purified by flash chromatography (petroleum ether: ethyl acetate: triethylamine = 1: 1: 1%). **1k** was obtained as a brown solid, *E*: *Z* = 5: 1.

**<sup>1</sup>H NMR (400 MHz, Chloroform-*d*)**  $\delta$  7.45 (t, *J* = 7.7 Hz, 1H), 7.36 (t, *J* = 8.0 Hz, 2H), 7.26 – 7.13 (m, 3H), 7.03 (ddd, *J* = 8.5, 5.6, 3.2 Hz, 1H), 6.95 (d, *J* = 7.7 Hz, 1H), 4.95 (d, *J* = 14.9 Hz, 1H), 4.21 (dd, *J* = 18.1, 6.0 Hz, 1H), 4.05 – 3.94 (m, 2H), 3.76 (s, 3H), 3.09 (p, *J* = 6.8 Hz, 1H), 2.24 (s, 3H), 1.15 (d, *J* = 6.8 Hz, 3H), 0.97 (d, *J* = 6.8 Hz, 3H).

**<sup>13</sup>C NMR (101 MHz, Chloroform-*d*)**  $\delta$  170.36, 169.96, 168.94, 157.35, 152.02, 145.47, 140.72, 136.33, 129.14, 128.62, 126.81, 126.39, 124.10, 121.15, 55.38, 52.45, 41.28, 27.95, 24.94, 23.94, 22.91.

**HRMS (ESI)** *m/z*: [M + Na]<sup>+</sup> Calcd for C<sub>21</sub>H<sub>25</sub>N<sub>3</sub>NaO<sub>4</sub> 406.1739; found: 406.1737.



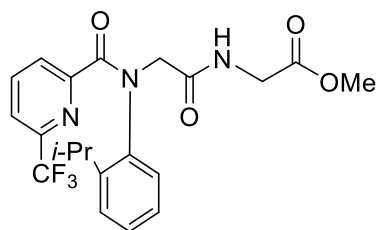

**Methyl *N*-(2-isopropylphenyl)-*N*-(6-(trifluoromethyl)picolinoyl)glycylglycinate (11)**

The title compound **11** was prepared according to the general procedure A and was purified by flash chromatography (petroleum ether: ethyl acetate: triethylamine = 1: 1: 1%). **1k** was obtained as a yellow solid, *E*: *Z* = 10: 1.

**<sup>1</sup>H NMR (400 MHz, Chloroform-*d*)** δ 7.93 (d, *J* = 7.9 Hz, 1H), 7.83 (t, *J* = 7.9 Hz, 1H), 7.50 (d, *J* = 7.8 Hz, 1H), 7.22 – 7.15 (m, 3H), 7.12 (t, *J* = 4.9 Hz, 1H), 6.99 (td, *J* = 7.4, 2.2 Hz, 1H), 4.98 (d, *J* = 15.0 Hz, 1H), 4.18 (dd, *J* = 18.3, 5.7 Hz, 1H), 4.04 (dd, *J* = 18.3, 5.1 Hz, 1H), 3.97 (d, *J* = 15.0 Hz, 1H), 3.76 (s, 3H), 3.07 (p, *J* = 6.8 Hz, 1H), 1.18 (d, *J* = 6.8 Hz, 3H), 1.02 (d, *J* = 6.8 Hz, 3H).

**<sup>13</sup>C NMR (101 MHz, Chloroform-*d*)** δ 170.35, 168.33, 168.10, 153.21, 146.58 (q, *J*<sub>CF<sub>3</sub></sub> = 35.5 Hz), 145.27, 140.18, 138.02, 129.08, 128.85, 127.07, 127.00, 126.45, 121.10 (q, *J*<sub>CF</sub> = 8.7 Hz), 55.26, 52.49, 41.30, 28.05, 24.80, 22.70.

**<sup>19</sup>F NMR (376 MHz, Chloroform-*d*)** δ -67.92.

**HRMS (ESI)** *m/z*: [M + Na]<sup>+</sup> Calcd for C<sub>21</sub>H<sub>22</sub>F<sub>3</sub>N<sub>3</sub>NaO<sub>4</sub> 460.1456; found: 460.1455.

## 2.2 Optimization of Reaction Conditions

**Table S1.** Optimization of reaction conditions<sup>a</sup>

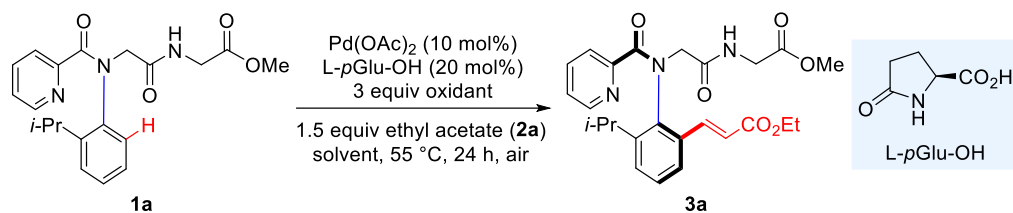

| Entry | Solvent          | Sxidant                         | Yield (%) <sup>b</sup> | <i>ee</i> (%) <sup>c</sup> |
|-------|------------------|---------------------------------|------------------------|----------------------------|
| 1     | HFIP             | Ag <sub>2</sub> CO <sub>3</sub> | 78                     | 94                         |
| 2     | THF              | Ag <sub>2</sub> CO <sub>3</sub> | 46                     | 90                         |
| 3     | 1,4-dioxane      | Ag <sub>2</sub> CO <sub>3</sub> | 39                     | 85                         |
| 4     | MeCN             | Ag <sub>2</sub> CO <sub>3</sub> | 82                     | 81                         |
| 5     | trifluoroethanol | Ag <sub>2</sub> CO <sub>3</sub> | 43                     | 81                         |
| 6     | HFIP             | AgOAc                           | 49                     | 79                         |
| 7     | HFIP             | Ag <sub>2</sub> O               | 22                     | 75                         |
| 8     | HFIP             | AgNO <sub>3</sub>               | 57                     | 89                         |

<sup>a</sup>Reaction conditions: **1a** (0.1 mmol, 1.0 equiv.), **2a** (1.5 equiv.), Pd(OAc)<sub>2</sub> (10 mol%), L-*p*Glu-OH (20 mol%), oxidant (3.0 equiv.) in solvent (0.4 mL) at 55 °C under air for 24 h.

<sup>b</sup>Isolated yield.

<sup>c</sup>The *ee* values were determined by chiral HPLC.

## 2.3 General Procedures for Pd(II)-Catalyzed Atroposelective C-H Olefination

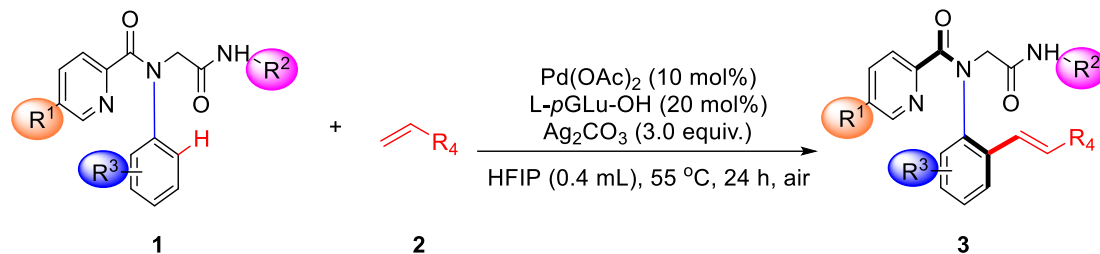

To a 10 mL Schlenk tube was added **1** (0.1 mmol), **2** (0.15 mmol), Pd(OAc)<sub>2</sub> (2.3 mg, 10 mol%), L-*p*Glu-OH (2.6 mg, 20 mol%) and Ag<sub>2</sub>CO<sub>3</sub> (82.8 mg, 3.0 equiv.), HFIP (0.4 mL) stirred at 55 °C (aluminum heat transfer block) under air at 24 h. After cooling to room temperature, the mixture was diluted with ethyl acetate, the resulting residue was purified by preparative TLC using Hexane/EtOAc as the eluent to afford the desired product.

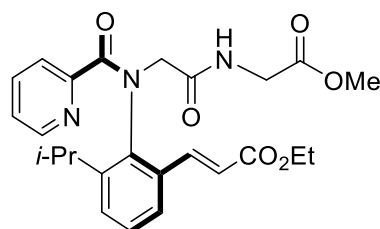

### Ethyl (*E*)-3-(3-isopropyl-2-(*N*-(2-((2-methoxy-2-oxoethyl)amino)-2-oxoethyl)picolinamido)phenyl)acrylate (**3a**)

A purification by flash chromatography in petroleum ether: ethyl acetate = 2 : 1 to give **3a** as yellow oil (36.3 mg, 78%, *E*: *Z* = 2: 1). (Note! The structure and NMR data of major *E*-rotamer were shown.)

**<sup>1</sup>H NMR (400 MHz, Chloroform-*d*)**  $\delta$  8.13 (d, *J* = 4.7 Hz, 1H), 7.90 (d, *J* = 15.9 Hz, 1H), 7.86 – 7.81 (m, 1H), 7.73 (d, *J* = 7.9 Hz, 1H), 7.62 (td, *J* = 7.8, 1.8 Hz, 1H), 7.35 (dd, *J* = 7.3, 1.9 Hz, 1H), 7.26 – 7.16 (m, 2H), 7.11 (dd, *J* = 7.8, 5.0 Hz, 1H), 6.28 (d, *J* = 15.9 Hz, 1H), 4.37 (dd, *J* = 14.6, 5.5 Hz, 2H), 4.26 – 4.20 (m, 2H), 4.15 (d, *J* = 6.5 Hz, 1H), 4.05 (dd, *J* = 18.3, 4.7 Hz, 1H), 3.77 (s, 3H), 3.05 – 3.00 (m, 1H), 1.31 (t, *J* = 7.1 Hz, 3H), 1.12 (d, *J* = 6.8 Hz, 3H), 0.79 (d, *J* = 6.8 Hz, 3H).

**<sup>13</sup>C NMR (101 MHz, Chloroform-*d*)** δ 170.08, 169.77, 168.34, 166.56, 151.93, 147.76, 146.53, 141.10, 140.21, 136.26, 132.80, 128.71, 128.68, 124.90, 124.71, 124.41, 121.07, 60.59, 56.64, 52.31, 41.35, 28.19, 24.88, 22.99, 14.32.

**HRMS (ESI)** m/z: [M + Na]<sup>+</sup> Calcd for C<sub>25</sub>H<sub>29</sub>N<sub>3</sub>NaO<sub>6</sub> 490.1948; found: 490.1949.

**HPLC:** OD-H column (hexane/isopropanol = 50/50, rate = 1.0 mL/min, λ = 254 nm) tr = 9.5 min (minor), 13.7 min (major), 94% ee.

**[α]<sub>D</sub><sup>20</sup>** = -117.1 (c = 1.0, CHCl<sub>3</sub>).

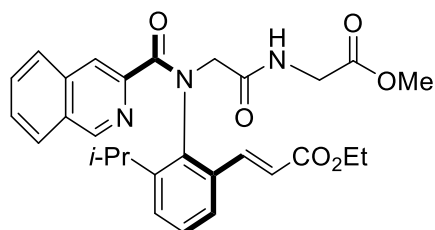

**Ethyl (*E*)-3-(3-isopropyl-2-(*N*-(2-((2-methoxy-2-oxoethyl)amino)-2-oxoethyl)isoquinoline-3-carboxamido)phenyl)acrylate(3b)**

A purification by flash chromatography in petroleum ether: ethyl acetate = 2 : 1 to give **3b** as yellow oil (12.8mg, 25%, *E*: *Z* = 5 : 1). (Note! The structure and NMR data of major *E*-rotamer were shown.)

**<sup>1</sup>H NMR (400 MHz, Chloroform-*d*)** δ 8.12 (d, *J* = 8.5 Hz, 1H), 8.01 (d, *J* = 15.9 Hz, 1H), 7.92 (d, *J* = 8.5 Hz, 1H), 7.84 (d, *J* = 5.3 Hz, 1H), 7.71 (d, *J* = 8.9 Hz, 1H), 7.57 – 7.44 (m, 3H), 7.39 (dd, *J* = 6.8, 1.9 Hz, 1H), 7.21 (d, *J* = 7.4 Hz, 2H), 6.29 (dd, *J* = 15.9, 3.7 Hz, 1H), 4.56 (d, *J* = 14.0 Hz, 1H), 4.37 (d, *J* = 14.2 Hz, 1H), 4.26 – 4.20 (m, 3H), 4.08 (dd, *J* = 18.3, 4.8 Hz, 1H), 3.79 (s, 3H), 3.11 – 3.05 (m, 1H), 1.31 (s, 3H), 1.15 (d, *J* = 6.8 Hz, 3H), 0.77 (d, *J* = 6.8 Hz, 3H).

**<sup>13</sup>C NMR (101 MHz, Chloroform-*d*)** δ 170.24, 169.59, 168.49, 166.74, 151.09, 146.33, 141.48, 136.55, 133.01, 129.88, 128.83, 128.69, 128.09, 127.48, 124.77, 121.04, 120.99, 60.68, 56.95, 52.45, 41.51, 28.30, 24.89, 23.37, 14.44.

**HRMS (ESI)** m/z: [M + Na]<sup>+</sup> Calcd for C<sub>24</sub>H<sub>28</sub>N<sub>4</sub>NaO<sub>6</sub> 540.2103; found: 540.2105.

**HPLC:** AD-H column (hexane/isopropanol = 70/30, rate = 1.0 mL/min, λ = 254 nm) tr = 19.7 min (minor), 29.8 min (major), 43% ee.

**[α]<sub>D</sub><sup>20</sup>** = +53.0 (c = 0.2, CHCl<sub>3</sub>).

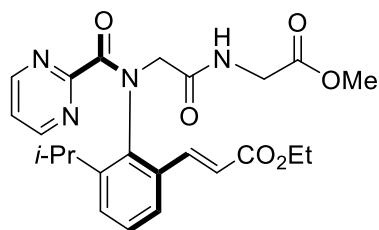

**Ethyl (*E*)-3-(3-isopropyl-2-(*N*-(2-((2-methoxy-2-oxoethyl)amino)-2-oxoethyl)pyrimidine-2-carboxamido)phenyl)acrylate(3c)**

A purification by flash chromatography in petroleum ether: ethyl acetate= 1: 2 to give **3c** as yellow oil (41.8mg, 89%, *E*: *Z* = 8: 1). (Note! The structure and NMR data of major *E*-rotamer were shown.)

**<sup>1</sup>H NMR (400 MHz, Chloroform-*d*)**  $\delta$  8.53 (d, *J* = 4.9 Hz, 2H), 8.00 (d, *J* = 15.9 Hz, 1H), 7.83 (t, *J* = 5.0 Hz, 1H), 7.34 (d, *J* = 5.9 Hz, 1H), 7.25 – 7.10 (m, 3H), 6.31 (d, *J* = 15.9 Hz, 1H), 4.41 (s, 2H), 4.25 (q, *J* = 7.2 Hz, 2H), 4.13 (t, *J* = 6.1 Hz, 2H), 3.77 (s, 3H), 3.08 (q, *J* = 6.8 Hz, 1H), 1.33 (t, *J* = 7.2 Hz, 3H), 1.11 (d, *J* = 6.8 Hz, 3H), 0.87 (d, *J* = 6.7 Hz, 3H).

**<sup>13</sup>C NMR (101 MHz, Chloroform-*d*)**  $\delta$  170.02, 168.23, 166.59, 160.58, 156.72, 147.24, 141.22, 138.74, 133.88, 129.36, 128.66, 125.07, 121.66, 121.46, 60.78, 56.24, 52.44, 41.52, 28.23, 25.30, 23.25, 14.44.

**HRMS (ESI)** *m/z*: [*M* + *Na*]<sup>+</sup> Calcd for C<sub>24</sub>H<sub>28</sub>N<sub>4</sub>NaO<sub>6</sub> 491.1901; found: 491.1902.

**HPLC**: OD-H column (hexane/isopropanol = 50/50, rate = 1.0 mL/min,  $\lambda$  = 254 nm) *tr* = 10.1 min (minor), 21.7 min (major), 96% ee.

**$[\alpha]_D^{20}$**  = -194.7 (*c* = 0.5, CHCl<sub>3</sub>).

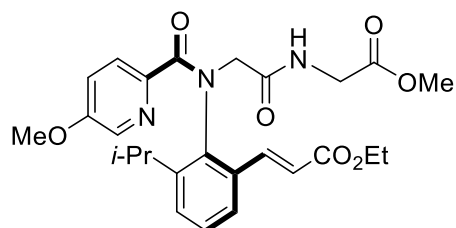

**Ethyl (*E*)-3-(3-isopropyl-2-(5-methoxy-*N*-(2-((2-methoxy-2-oxoethyl)amino)-2-oxoethyl)picolinamido)phenyl)acrylate(3d)**

A purification by flash chromatography in petroleum ether: ethyl acetate= 2: 1 to give **3d** as yellow oil (50.7mg, 41%, *E*: *Z* = 3: 1). (Note! The structure and NMR data of major *E*-rotamer were shown.)

**<sup>1</sup>H NMR (400 MHz, Chloroform-*d*)**  $\delta$  7.91 (t,  $J = 5.4$  Hz, 1H), 7.86 (d,  $J = 15.9$  Hz, 1H), 7.81 – 7.75 (m, 2H), 7.37 (dd,  $J = 7.1, 2.2$  Hz, 1H), 7.25 – 7.18 (m, 2H), 7.08 (dd,  $J = 8.7, 2.9$  Hz, 1H), 6.29 (d,  $J = 15.9$  Hz, 1H), 4.36 (s, 2H), 4.23 – 4.19 (m, 2H), 4.14 (dd,  $J = 9.1, 5.6$  Hz, 1H), 4.04 (dd,  $J = 18.2, 4.8$  Hz, 1H), 3.77 (d,  $J = 2.6$  Hz, 6H), 2.99 (p,  $J = 6.8$  Hz, 1H), 1.31 (t,  $J = 7.2$  Hz, 3H), 1.12 (d,  $J = 6.8$  Hz, 3H), 0.77 (d,  $J = 6.8$  Hz, 3H).

**<sup>13</sup>C NMR (101 MHz, Chloroform-*d*)**  $\delta$  170.22, 169.41, 168.67, 166.73, 156.58, 146.46, 140.91, 135.65, 132.75, 128.82, 128.55, 126.14, 124.84, 120.98, 119.85, 60.67, 56.95, 55.69, 52.40, 41.44, 28.30, 24.86, 23.22, 14.43.

**HRMS (ESI)**  $m/z$ :  $[M + Na]^+$  Calcd for C<sub>26</sub>H<sub>31</sub>N<sub>3</sub>NaO<sub>7</sub> 520.2054; found: 520.2055.

**HPLC**: AD-H column (hexane/isopropanol = 50/50, rate = 1.0 mL/min,  $\lambda = 254$  nm)  $t_r = 20.3$  min (minor), 11.7 min (major), 95% ee.

**$[\alpha]_D^{20}$**  = -160.2 ( $c = 1.0$ , CHCl<sub>3</sub>).

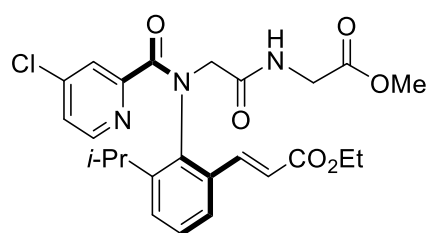

**Ethyl (*E*)-3-(2-(4-chloro-*N*-(2-((2-methoxy-2-oxoethyl)amino)-2-oxoethyl)picolinamido)-3-isopropylphenyl)acrylate(3e)**

A purification by flash chromatography in petroleum ether: ethyl acetate = 2: 1 to give **3e** as yellow oil (40.2mg, 80%,  $E:Z = 3:1$ ). (Note! The structure and NMR data of major *E*-rotamer were shown.)

**<sup>1</sup>H NMR (400 MHz, Chloroform-*d*)**  $\delta$  7.98 (d,  $J = 5.1$  Hz, 1H), 7.86 (d,  $J = 15.9$  Hz, 1H), 7.79 (d,  $J = 2.0$  Hz, 1H), 7.70 (t,  $J = 5.4$  Hz, 1H), 7.33 (dd,  $J = 6.8, 2.4$  Hz, 1H), 7.25 – 7.17 (m, 2H), 7.11 (dd,  $J = 5.3, 2.1$  Hz, 1H), 6.24 (d,  $J = 15.9$  Hz, 1H), 4.43 (d,  $J = 14.3$  Hz, 1H), 4.30 (d,  $J = 14.3$  Hz, 1H), 4.25 – 4.20 (m, 2H), 4.17 (dd,  $J = 7.9, 5.1$  Hz, 1H), 4.07 – 4.01 (m, 1H), 3.76 (s, 3H), 3.05 – 2.98 (m, 1H), 1.30 (t,  $J = 7.1$  Hz, 3H), 1.13 (d,  $J = 6.8$  Hz, 3H), 0.85 (d,  $J = 6.7$  Hz, 3H).

**<sup>13</sup>C NMR (101 MHz, Chloroform-*d*)**  $\delta$  170.15, 168.60, 168.06, 166.56, 148.64, 146.56, 144.58, 141.04, 139.90, 132.91, 128.95, 128.83, 125.22, 125.10, 124.79, 121.31, 60.70, 56.68, 52.42, 41.43, 28.31, 23.14, 14.40.

**HRMS (ESI)** *m/z*: [M + Na]<sup>+</sup> Calcd for C<sub>25</sub>H<sub>28</sub>ClN<sub>3</sub>NaO<sub>6</sub> 524.1559; found: 524.1559.

**HPLC**: AD-H column (hexane/isopropanol = 50/50, rate = 1.0 mL/min,  $\lambda$  = 254 nm) *tr* = 10.0 min (minor), 6.7 min (major), 95% ee.

**$[\alpha]_D^{20}$**  = -137.8 (c = 1.0, CHCl<sub>3</sub>).

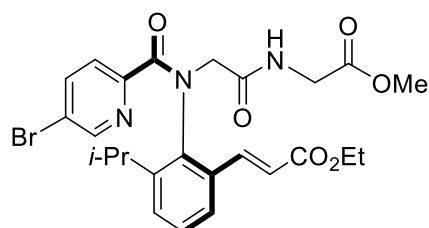

**Ethyl (*E*)-3-(2-(5-bromo-*N*-(2-((2-methoxy-2-oxoethyl)amino)-2-oxoethyl)picolinamido)-3-isopropylphenyl)acrylate(3f)**

A purification by flash chromatography in petroleum ether : ethyl acetate = 2 : 1 to give **3f** as yellow oil (35.5 mg, 65%, *E*: *Z* = 5 : 1). (Note! The structure and NMR data of major *E*-rotamer were shown.)

**<sup>1</sup>H NMR (400 MHz, Chloroform-*d*)**  $\delta$  8.14 (d, *J* = 2.2 Hz, 1H), 7.83 (d, *J* = 15.9 Hz, 1H), 7.77 (dd, *J* = 8.3, 2.3 Hz, 1H), 7.73 (t, *J* = 5.3 Hz, 1H), 7.69 (d, *J* = 8.4 Hz, 1H), 7.34 (dd, *J* = 6.9, 2.3 Hz, 1H), 7.24 (q, *J* = 7.5, 6.9 Hz, 2H), 6.26 (d, *J* = 15.9 Hz, 1H), 4.43 (d, *J* = 14.3 Hz, 1H), 4.29 (d, *J* = 14.2 Hz, 1H), 4.22 (td, *J* = 7.1, 1.4 Hz, 2H), 4.17 (d, *J* = 9.5 Hz, 1H), 4.03 (dd, *J* = 18.3, 4.7 Hz, 1H), 3.76 (s, 3H), 3.05 – 2.98 (m, 1H), 1.30 (t, *J* = 7.1 Hz, 3H), 1.13 (d, *J* = 6.8 Hz, 3H), 0.84 (d, *J* = 6.8 Hz, 3H).

**<sup>13</sup>C NMR (101 MHz, Chloroform-*d*)**  $\delta$  170.17, 168.84, 168.10, 166.59, 148.79, 146.58, 140.89, 140.10, 139.18, 128.93, 126.04, 124.80, 122.75, 121.19, 60.68, 56.70, 52.40, 41.41, 28.28, 24.85, 23.25, 14.38.

**HRMS (ESI)** *m/z*: [M + Na]<sup>+</sup> Calcd for C<sub>25</sub>H<sub>28</sub>BrN<sub>3</sub>NaO<sub>6</sub> 568.1053; found: 568.1054.

**HPLC**: AD-H column (hexane/isopropanol = 50/50, rate = 1.0 mL/min,  $\lambda$  = 254 nm) *tr* = 17.3 min (minor), 9.9 min (major), 97% ee.

**$[\alpha]_D^{20}$**  = -173.1 (c = 1.0, CHCl<sub>3</sub>).

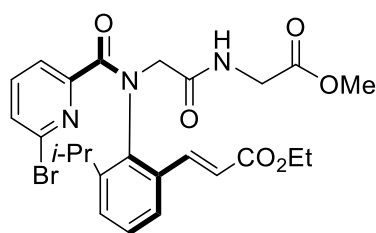

**Ethyl (*E*)-3-(2-(6-bromo-*N*-(2-((2-methoxy-2-oxoethyl)amino)-2-oxoethyl)picolinamido)-3-isopropylphenyl)acrylate(3g)**

A purification by flash chromatography in petroleum ether : ethyl acetate= 1: 1 to give **3g** as yellow oil (2.5 mg, 5%, *E*: *Z* = 10: 1). (Note! The structure and NMR data of major *E*-rotamer were shown.)

**<sup>1</sup>H NMR (400 MHz, Chloroform-*d*)**  $\delta$  7.86 – 7.78 (m, 2H), 7.68 (d, *J* = 6.5 Hz, 1H), 7.50 (t, *J* = 7.8 Hz, 1H), 7.38 (dd, *J* = 5.9, 3.3 Hz, 1H), 7.33 – 7.27 (m, 3H), 6.26 (d, *J* = 15.8 Hz, 1H), 4.53 (d, *J* = 14.2 Hz, 1H), 4.27 – 4.18 (m, 4H), 4.06 (dd, *J* = 18.4, 4.7 Hz, 1H), 3.78 (s, 3H), 3.00 (p, *J* = 6.8 Hz, 1H), 1.31 (s, 3H), 1.17 (d, *J* = 6.8 Hz, 3H), 0.93 (d, *J* = 6.7 Hz, 3H).

**<sup>13</sup>C NMR (101 MHz, Chloroform-*d*)**  $\delta$  170.24, 168.12, 167.85, 166.70, 152.22, 140.99, 140.00, 139.86, 138.73, 132.79, 129.91, 129.07, 129.05, 124.88, 123.70, 121.17, 60.69, 56.78, 52.47, 41.50, 28.36, 24.96, 23.38, 14.43.

**HRMS (ESI)** *m/z*: [M + Na]<sup>+</sup> Calcd for C<sub>25</sub>H<sub>28</sub>N<sub>3</sub>NaO<sub>6</sub> 568.1053; found: 568.1055.

**HPLC**: OD-H column (hexane/isopropanol = 50/50, rate = 1.0 mL/min,  $\lambda$  = 254 nm) *tr* = 9.9 min (minor), 20.5 min (major), 34% ee.

**[ $\alpha$ ]<sub>D</sub><sup>20</sup>** = -58.0 (*c* = 0.1, CHCl<sub>3</sub>).

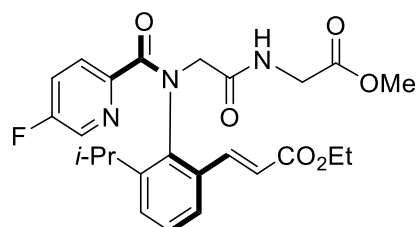

**Ethyl (*E*)-3-(2-(5-fluoro-*N*-(2-((2-methoxy-2-oxoethyl)amino)-2-oxoethyl)picolinamido)-3-isopropylphenyl)acrylate(3h)**

A purification by flash chromatography in petroleum ether : ethyl acetate= 2: 1 to give **3h** as yellow oil (40.7 mg, 84%, *E*: *Z* = 5:1). (Note! The structure and NMR data of major *E*-rotamer were shown.)



**<sup>1</sup>H NMR (400 MHz, Chloroform-*d*)**  $\delta$  7.94 (d,  $J = 2.8$  Hz, 1H), 7.90 – 7.82 (m, 2H), 7.76 (t,  $J = 5.6$  Hz, 1H), 7.34 (ddd,  $J = 13.1, 7.7, 2.6$  Hz, 2H), 7.26 – 7.20 (m, 2H), 6.27 (d,  $J = 15.9$  Hz, 1H), 4.42 (d,  $J = 14.2$  Hz, 1H), 4.32 (d,  $J = 14.2$  Hz, 1H), 4.21 (dd,  $J = 13.4, 7.7$  Hz, 3H), 4.04 (dd,  $J = 18.3, 4.7$  Hz, 1H), 3.78 (s, 3H), 3.01 (q,  $J = 6.7$  Hz, 1H), 1.31 (t,  $J = 7.1$  Hz, 3H), 1.14 (d,  $J = 6.8$  Hz, 3H), 0.82 (d,  $J = 6.8$  Hz, 3H).

**<sup>13</sup>C NMR (101 MHz, Chloroform-*d*)**  $\delta$  170.22, 168.67, 168.26, 166.64, 148.15, 146.54, 141.04, 140.31, 136.32, 136.08, 128.90, 126.62, 124.85, 123.28, 123.09, 121.21, 60.72, 56.81, 52.44, 41.45, 28.31, 24.89, 23.22, 14.42.

**<sup>19</sup>F NMR (376 MHz, Chloroform-*d*)**  $\delta$  -122.16.

**HRMS (ESI)**  $m/z$ :  $[M + Na]^+$  Calcd for  $C_{25}H_{28}FN_3NaO_6$  508.1854; found: 508.1855.

**HPLC**: AD-H column (hexane/isopropanol = 50/50, rate = 1.0 mL/min,  $\lambda = 254$  nm)  $t_r = 9.6$  min (minor), 7.5 min (major), 96% ee.

**$[\alpha]_D^{20}$**  = -123.8 ( $c = 1.0$ ,  $CHCl_3$ ).

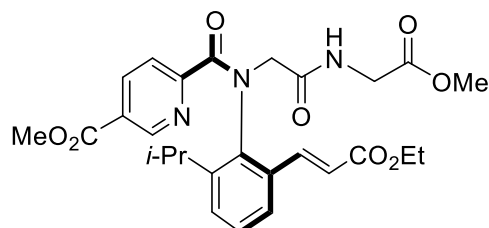

**Methyl (E)-6-((2-(3-ethoxy-3-oxoprop-1-en-1-yl)-6-isopropylphenyl)(2-((2-methoxy-2-oxoethyl)amino)-2-oxoethyl)carbamoyl)nicotinate (3i)**

A purification by flash chromatography in petroleum ether : ethyl acetate = 2: 1 to give **3i** as yellow oil (50.7mg, 97%,  $E:Z = 5:1$ ). (Note! The structure and NMR data of major  $E$ -rotamer were shown.)

**<sup>1</sup>H NMR (400 MHz, Chloroform-*d*)**  $\delta$  8.69 (d,  $J = 2.1$  Hz, 1H), 8.21 (dd,  $J = 8.2, 2.1$  Hz, 1H), 7.91 – 7.79 (m, 2H), 7.71 (t,  $J = 5.4$  Hz, 1H), 7.32 (dd,  $J = 6.6, 2.6$  Hz, 1H), 7.25 – 7.14 (m, 2H), 6.24 (d,  $J = 15.9$  Hz, 1H), 4.47 (d,  $J = 14.3$  Hz, 1H), 4.29 (d,  $J = 14.3$  Hz, 1H), 4.24 – 4.16 (m, 3H), 4.07 – 4.02 (m, 1H), 3.86 (s, 3H), 3.78 – 3.72 (m, 3H), 3.04 (q,  $J = 6.7$  Hz, 1H), 1.30 (t,  $J = 7.2$  Hz, 3H), 1.13 (d,  $J = 6.7$  Hz, 3H), 0.86 (d,  $J = 6.7$  Hz, 3H).

**<sup>13</sup>C NMR (101 MHz, Chloroform-*d*)**  $\delta$  170.16, 169.03, 168.02, 166.56, 148.85, 146.76, 140.85, 139.75, 137.55, 132.84, 129.07, 128.94, 126.55, 124.75, 124.06, 121.25, 60.69, 56.56, 52.62, 52.40, 41.42, 28.30, 24.91, 23.21, 14.37.

**HRMS (ESI)** *m/z*: [M + Na]<sup>+</sup> Calcd for C<sub>27</sub>H<sub>31</sub>N<sub>3</sub>NaO<sub>8</sub> 548.2003; found: 548.2002.

**HPLC**: AD-H column (hexane/isopropanol = 50/50, rate = 1.0 mL/min,  $\lambda$  = 254 nm) *tr* = 10.4 min (minor), 6.5 min (major), 94% ee.

**$[\alpha]_D^{20}$**  = -126.0 (*c* = 1.0, CHCl<sub>3</sub>).

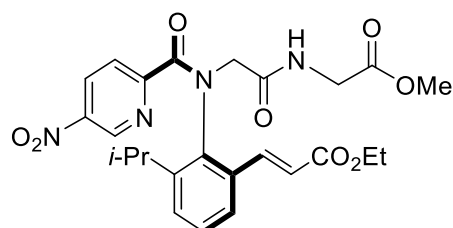

**Ethyl (*E*)-3-(3-isopropyl-2-(*N*-(2-((2-methoxy-2-oxoethyl)amino)-2-oxoethyl)-5-nitropicolinamido)phenyl)acrylate(3j)**

A purification by flash chromatography in petroleum ether : ethyl acetate = 2 : 1 to give **3j** as yellow oil (39.1mg, 76%, *E*:*Z* = 7 : 1). (Note! The structure and NMR data of major *E*-rotamer were shown.)

**<sup>1</sup>H NMR (400 MHz, Chloroform-*d*)**  $\delta$  8.91 (d, *J* = 2.5 Hz, 1H), 8.43 (dd, *J* = 8.6, 2.5 Hz, 1H), 7.99 (d, *J* = 8.6 Hz, 1H), 7.87 (d, *J* = 15.8 Hz, 1H), 7.56 (t, *J* = 5.4 Hz, 1H), 7.35 (dd, *J* = 6.0, 3.3 Hz, 1H), 7.29 – 7.26 (m, 2H), 6.26 (d, *J* = 15.9 Hz, 1H), 4.53 (d, *J* = 14.2 Hz, 1H), 4.28 (d, *J* = 14.3 Hz, 1H), 4.21 (dd, *J* = 18.3, 5.9 Hz, 3H), 4.07 (dd, *J* = 18.3, 4.6 Hz, 1H), 3.79 (s, 3H), 3.10 (p, *J* = 6.8 Hz, 1H), 1.32 (t, *J* = 7.1 Hz, 3H), 1.18 (d, *J* = 6.8 Hz, 3H), 0.95 (d, *J* = 6.7 Hz, 3H).

**<sup>13</sup>C NMR (101 MHz, Chloroform-*d*)**  $\delta$  167.83, 167.60, 146.91, 144.02, 143.06, 140.49, 139.29, 132.85, 131.75, 129.47, 129.16, 125.09, 124.86, 121.54, 60.82, 56.54, 52.50, 41.48, 28.39, 24.93, 23.35, 14.40.

**HRMS (ESI)** *m/z*: [M + Na]<sup>+</sup> Calcd for C<sub>25</sub>H<sub>28</sub>N<sub>4</sub>NaO<sub>8</sub> 535.1799; found: 535.1799.

**HPLC**: AS-H column (hexane/isopropanol = 60/40, rate = 1.0 mL/min,  $\lambda$  = 254 nm) *tr* = 25.2 min (minor), 12.1 min (major), 98% ee.

**$[\alpha]_D^{20}$**  = -136.7 (*c* = 1.0, CHCl<sub>3</sub>).

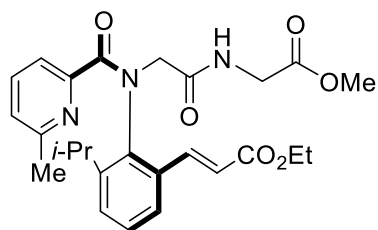

**Ethyl (*E*)-3-(3-isopropyl-2-(*N*-(2-((2-methoxy-2-oxoethyl)amino)-2-oxoethyl)-6-methylpicolinamido)phenyl)acrylate (3k)**

A purification by flash chromatography in petroleum ether : ethyl acetate= 2: 1 to give **3k** as yellow oil (36.2 mg, 75%, *E*: *Z* = 5: 1). (Note! The structure and NMR data of major *E*-rotamer were shown.)

**<sup>1</sup>H NMR (400 MHz, Chloroform-*d*)**  $\delta$  7.91 (d, *J* = 15.9 Hz, 1H), 7.85 (t, *J* = 5.5 Hz, 1H), 7.58 (d, *J* = 7.7 Hz, 1H), 7.49 (t, *J* = 7.7 Hz, 1H), 7.36 (d, *J* = 7.5 Hz, 1H), 7.22 (t, *J* = 7.6 Hz, 1H), 7.18 (dd, *J* = 7.8, 1.7 Hz, 1H), 6.95 (d, *J* = 7.6 Hz, 1H), 6.27 (d, *J* = 15.9 Hz, 1H), 4.43 (d, *J* = 14.2 Hz, 1H), 4.33 (d, *J* = 14.2 Hz, 1H), 4.21 (d, *J* = 7.6 Hz, 2H), 4.14 (dd, *J* = 16.0, 6.3 Hz, 1H), 4.05 (dd, *J* = 18.3, 4.8 Hz, 1H), 3.76 (s, 3H), 2.96 (hept, *J* = 6.6 Hz, 1H), 2.04 (s, 3H), 1.30 (t, *J* = 7.1 Hz, 3H), 1.10 (d, *J* = 6.8 Hz, 3H), 0.74 (d, *J* = 6.8 Hz, 3H).

**<sup>13</sup>C NMR (101 MHz, Chloroform-*d*)**  $\delta$  170.16, 169.65, 168.57, 166.68, 156.78, 146.25, 141.53, 140.84, 136.50, 133.02, 128.65, 128.49, 124.62, 121.64, 120.81, 60.60, 56.78, 52.36, 41.42, 28.15, 24.91, 23.58, 23.10, 14.39.

**HRMS (ESI)** *m/z*: [M + Na]<sup>+</sup> Calcd for C<sub>26</sub>H<sub>31</sub>N<sub>3</sub>NaO<sub>6</sub> 504.2108; found: 504.2105.

**HPLC**: OD-H column (hexane/isopropanol = 50/50, rate = 1.0 mL/min,  $\lambda$  = 254 nm) *tr* = 15.2 min (minor), 8.0 min (major), 21% ee.

**[ $\alpha$ ]<sub>D</sub><sup>20</sup>** = +33.6 (*c* = 1.0, CHCl<sub>3</sub>).

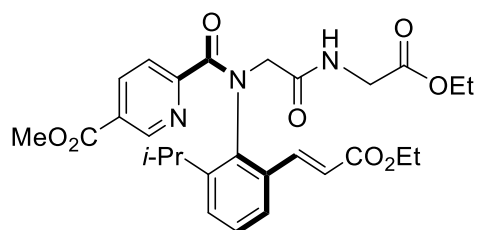

**Methyl (*E*)-6-((2-((2-ethoxy-2-oxoethyl)amino)-2-oxoethyl)(2-(3-ethoxy-3-oxoprop-1-en-1-yl)-6-isopropylphenyl)carbamoyl)nicotinate (3o)**

A purification by flash chromatography in petroleum ether : ethyl acetate= 2: 1 to give **3o** as yellow

oil (52.8 mg, 98%, *E*: *Z* = 5: 1). (Note! The structure and NMR data of major *E*-rotamer were shown.)

**<sup>1</sup>H NMR (400 MHz, Chloroform-*d*)**  $\delta$  8.70 (d, *J* = 2.1 Hz, 1H), 8.22 (dd, *J* = 8.2, 2.1 Hz, 1H), 7.93 – 7.82 (m, 2H), 7.70 (t, *J* = 5.3 Hz, 1H), 7.33 (dd, *J* = 7.0, 2.2 Hz, 1H), 7.22 (d, *J* = 6.5 Hz, 2H), 6.26 (d, *J* = 15.9 Hz, 1H), 4.46 (d, *J* = 14.3 Hz, 1H), 4.33 (d, *J* = 14.2 Hz, 1H), 4.24 (ddt, *J* = 9.6, 4.1, 2.5 Hz, 4H), 4.16 (d, *J* = 5.9 Hz, 1H), 4.06 (d, *J* = 4.6 Hz, 1H), 3.87 (s, 3H), 3.07 (q, *J* = 6.7 Hz, 1H), 1.30 (d, *J* = 7.5 Hz, 6H), 1.14 (d, *J* = 6.8 Hz, 3H), 0.86 (d, *J* = 6.8 Hz, 3H).

**<sup>13</sup>C NMR (101 MHz, Chloroform-*d*)**  $\delta$  169.71, 169.04, 168.02, 165.09, 155.46, 148.88, 146.76, 140.89, 139.78, 137.57, 129.08, 128.95, 126.57, 124.80, 121.30, 61.55, 60.72, 56.63, 52.65, 41.63, 28.32, 24.96, 23.23, 14.42, 14.29.

**HRMS (ESI)** *m/z*: [M + Na]<sup>+</sup> Calcd for C<sub>28</sub>H<sub>33</sub>N<sub>3</sub>NaO<sub>8</sub> 562.216; found: 562.216.

**HPLC**: AD-H column (hexane/isopropanol = 50/50, rate = 1.0 mL/min,  $\lambda$  = 254 nm) *tr* = 11.0 min (minor), 7.4 min (major), 96% ee.

**$[\alpha]_D^{20}$**  = -101.4 (*c* = 1.0, CHCl<sub>3</sub>).

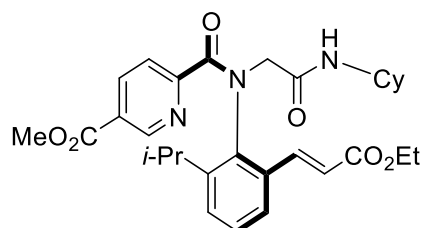

**Methyl (E)-6-((2-(cyclohexylamino)-2-oxoethyl)(2-(3-ethoxy-3-oxoprop-1-en-1-yl)-6-isopropylphenyl)carbamoyl)nicotinate (3p)**

A purification by flash chromatography in petroleum ether : ethyl acetate = 2: 1 to give **3p** as yellow oil (51.6mg, 96%, *E*: *Z* = 8: 1). (Note! The structure and NMR data of major *E*-rotamer were shown.)

**<sup>1</sup>H NMR (400 MHz, Chloroform-*d*)**  $\delta$  8.71 (d, *J* = 2.1 Hz, 1H), 8.21 (dd, *J* = 8.2, 2.1 Hz, 1H), 7.82 (d, *J* = 15.9 Hz, 1H), 7.76 (d, *J* = 8.1 Hz, 1H), 7.33 (dd, *J* = 6.8, 2.4 Hz, 1H), 7.22 (q, *J* = 6.8, 5.8 Hz, 2H), 7.13 (d, *J* = 8.0 Hz, 1H), 4.47 (d, *J* = 14.2 Hz, 1H), 4.24 (tt, *J* = 7.1, 3.5 Hz, 2H), 4.11 (d, *J* = 14.1 Hz, 1H), 3.87 (s, 3H), 3.82 – 3.70 (m, 1H), 3.06 (p, *J* = 6.7 Hz, 1H), 2.02 – 1.89 (m, 2H), 1.79 – 1.57 (m, 5H), 1.32 (t, *J* = 7.2 Hz, 6H), 1.18 (d, *J* = 6.8 Hz, 3H), 0.86 (d, *J* = 6.8 Hz, 3H).

**$^{13}\text{C}$  NMR (101 MHz, Chloroform-*d*)**  $\delta$  169.11, 166.87, 166.51, 148.94, 146.80, 140.81, 139.91, 137.53, 132.80, 129.02, 128.92, 126.53, 124.89, 123.91, 121.50, 60.73, 57.49, 52.66, 48.53, 32.94, 32.87, 28.40, 25.69, 25.12, 24.82, 24.81, 23.24, 14.44.

**HRMS (ESI)**  $m/z$ :  $[\text{M} + \text{Na}]^+$  Calcd for  $\text{C}_{30}\text{H}_{37}\text{N}_3\text{NaO}_6$  558.2574; found: 558.2575.

**HPLC**: AD-H column (hexane/isopropanol = 80/20, rate = 1.0 mL/min,  $\lambda$  = 254 nm)  $t_r$  = 11.6 min (minor), 8.4 min (major), 83% ee.

**$[\alpha]_D^{20}$**  = -165.0 ( $c$  = 1.0,  $\text{CHCl}_3$ ).

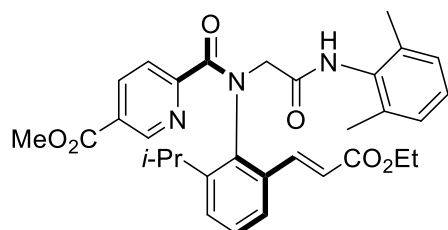

**Methyl (*E*)-6-((2-((2,6-dimethylphenyl)amino)-2-oxoethyl)(2-(3-ethoxy-3-oxoprop-1-en-1-yl)-6-isopropylphenyl)carbamoyl)nicotinate (3q)**

A purification by flash chromatography in petroleum ether : ethyl acetate = 2: 1 to give **3q** as yellow oil (48.4 mg, 87%, *E*: *Z* = 10: 1). (Note! The structure and NMR data of major *E*-rotamer were shown.)

**$^1\text{H}$  NMR (400 MHz, Chloroform-*d*)**  $\delta$  8.72 (d,  $J$  = 2.1 Hz, 1H), 8.44 (s, 1H), 8.23 (dd,  $J$  = 8.1, 2.1 Hz, 1H), 7.94 (d,  $J$  = 15.9 Hz, 1H), 7.80 (d,  $J$  = 8.1 Hz, 1H), 7.32 (dd,  $J$  = 5.6, 3.7 Hz, 1H), 7.25 (d,  $J$  = 5.6 Hz, 2H), 7.07 (s, 3H), 6.22 (d,  $J$  = 15.9 Hz, 1H), 4.70 (d,  $J$  = 14.4 Hz, 1H), 4.32 (d,  $J$  = 14.4 Hz, 1H), 4.18 – 4.10 (m, 2H), 3.88 (s, 3H), 3.26 (p,  $J$  = 6.8 Hz, 1H), 2.30 (s, 6H), 1.24 (d,  $J$  = 7.1 Hz, 3H), 1.20 (t,  $J$  = 6.9 Hz, 3H), 0.94 (d,  $J$  = 6.8 Hz, 3H).

**$^{13}\text{C}$  NMR (101 MHz, Chloroform-*d*)**  $\delta$  169.52, 166.41, 165.91, 165.06, 148.91, 147.02, 140.92, 140.34, 137.59, 135.08, 133.93, 132.84, 129.08, 129.04, 128.33, 127.23, 126.60, 124.81, 123.91, 121.63, 60.78, 57.54, 52.66, 28.49, 24.98, 23.27, 18.68, 14.28.

**HRMS (ESI)**  $m/z$ :  $[\text{M} + \text{Na}]^+$  Calcd for  $\text{C}_{32}\text{H}_{35}\text{N}_3\text{NaO}_6$  580.2418; found: 580.2418.

**HPLC**: AD-H column (hexane/isopropanol = 80/20, rate = 0.8 mL/min,  $\lambda$  = 254 nm)  $t_r$  = 15.1 min (minor), 10.9 min (major), 95% ee.

**$[\alpha]_D^{20}$**  = -125.8 ( $c$  = 1.0,  $\text{CHCl}_3$ ).

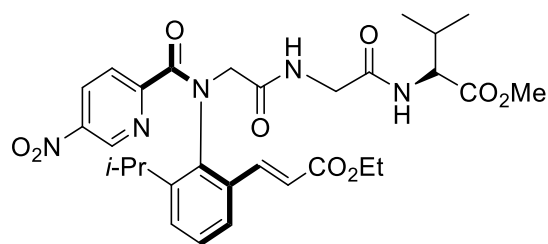

**Methyl (*E*)-*N*-(2-(3-ethoxy-3-oxoprop-1-en-1-yl)-6-isopropylphenyl)-*N*-(5-nitropicolinoyl)glycylglycyl-*D*-valinate (3r)**

A purification by flash chromatography in petroleum ether : ethyl acetate = 2 : 1 to give **3r** as yellow oil (43.5 mg, 71%, *E*: *Z* = 9 : 1). (Note! The structure and NMR data of major *E*-rotamer were shown.)

**<sup>1</sup>H NMR (400 MHz, Chloroform-*d*)** δ 8.87 (d, *J* = 2.5 Hz, 1H), 8.40 (dd, *J* = 8.6, 2.6 Hz, 1H), 7.98 (d, *J* = 8.6 Hz, 1H), 7.92 (d, *J* = 15.9 Hz, 1H), 7.54 (t, *J* = 5.2 Hz, 1H), 7.32 (q, *J* = 4.2, 3.8 Hz, 1H), 7.25 (s, 1H), 6.93 (d, *J* = 8.6 Hz, 1H), 6.23 (d, *J* = 15.9 Hz, 1H), 4.51 (dd, *J* = 8.6, 5.4 Hz, 1H), 4.40 (d, *J* = 14.6 Hz, 1H), 4.28 – 4.16 (m, 4H), 4.10 (d, *J* = 7.1 Hz, 1H), 3.97 (dd, *J* = 16.8, 4.9 Hz, 1H), 3.70 (s, 3H), 3.21 (p, *J* = 6.8 Hz, 1H), 2.18 – 2.12 (m, 1H), 1.30 (t, *J* = 7.1 Hz, 3H), 1.23 (t, *J* = 7.1 Hz, 3H), 1.17 (d, *J* = 6.7 Hz, 3H), 0.94 – 0.91 (m, 6H).

**<sup>13</sup>C NMR (101 MHz, Chloroform-*d*)** δ 172.47, 168.89, 167.76, 167.64, 166.60, 156.89, 146.95, 143.98, 142.99, 140.70, 139.51, 132.80, 131.73, 129.38, 129.17, 125.13, 124.79, 121.48, 60.90, 57.54, 56.55, 52.26, 43.44, 31.10, 28.23, 24.91, 23.25, 19.05, 18.07, 14.39.

**HRMS (ESI)** *m/z*: [M + Na]<sup>+</sup> Calcd for C<sub>30</sub>H<sub>37</sub>N<sub>5</sub>NaO<sub>9</sub> 634.2483; found: 634.2483.

**HPLC**: IE-H column (hexane/isopropanol = 50/50, rate = 1.0 mL/min, λ = 254 nm) *t<sub>r</sub>* = 23.8 min (minor), 36.6 min (major), 91% de.

**[α]<sub>D</sub><sup>20</sup>** = -105.2 (c = 1.0, CHCl<sub>3</sub>).

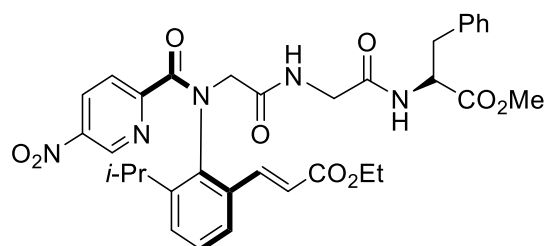

**Ethyl (*R,E*)-3-(3-isopropyl-2-(*N*-(2-((2-((1-methoxy-1-oxo-3-phenylpropan-2-yl)amino)-2-oxoethyl)amino)-2-oxoethyl)-5-nitropicolinamido)phenyl)acrylate (3s)**

A purification by flash chromatography in petroleum ether: ethyl acetate= 1: 2 to give **3s** as yellow oil (37.1 mg, 56%, *E: Z* = 10: 1). (Note! The structure and NMR data of major *E*-rotamer were shown.)

**<sup>1</sup>H NMR (400 MHz, Chloroform-*d*)**  $\delta$  8.88 (d, *J* = 2.5 Hz, 1H), 8.38 (dd, *J* = 8.6, 2.6 Hz, 1H), 7.98 – 7.84 (m, 2H), 7.42 (t, *J* = 5.7 Hz, 1H), 7.37 – 7.31 (m, 1H), 7.27 (s, 1H), 7.22 (dd, *J* = 16.1, 7.1 Hz, 4H), 7.16 – 7.10 (m, 2H), 6.84 (d, *J* = 7.9 Hz, 1H), 6.25 (d, *J* = 15.9 Hz, 1H), 4.86 (q, *J* = 6.6 Hz, 1H), 4.36 (d, *J* = 14.6 Hz, 1H), 4.28 – 4.18 (m, 3H), 4.15 – 4.10 (m, 1H), 3.92 (dd, *J* = 16.8, 4.8 Hz, 1H), 3.68 (s, 3H), 3.21 (p, *J* = 8.1, 7.4 Hz, 1H), 3.12 (t, *J* = 6.3 Hz, 2H), 1.31 (t, *J* = 7.1 Hz, 3H), 1.18 (d, *J* = 6.7 Hz, 3H), 0.93 (d, *J* = 6.7 Hz, 3H).

**<sup>13</sup>C NMR (101 MHz, Chloroform-*d*)**  $\delta$  172.00, 168.57, 167.67, 166.56, 142.97, 140.66, 136.04, 132.80, 131.72, 129.38, 129.16, 128.65, 127.17, 125.11, 124.79, 121.49, 60.87, 56.54, 53.56, 52.44, 37.81, 28.22, 24.93, 23.25, 14.39.

**HRMS (ESI)** *m/z*: [M + Na]<sup>+</sup> Calcd for C<sub>34</sub>H<sub>37</sub>N<sub>5</sub>NaO<sub>9</sub> 682.2483; found: 648.2485.

**HPLC**: IE-H column (hexane/isopropanol = 70/30, rate = 1.0 mL/min,  $\lambda$  = 254 nm) *t<sub>r</sub>* = 68.7 min (minor), 84.6 min (major), 93% de.

**[ $\alpha$ ]<sub>D</sub><sup>20</sup>** = -86.4 (c = 0.5, CHCl<sub>3</sub>).

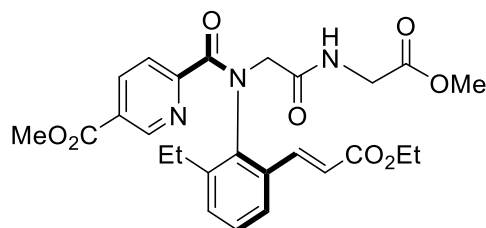

**Methyl (*E*)-6-((2-(3-ethoxy-3-oxoprop-1-en-1-yl)-6-ethylphenyl)(2-((2-methoxy-2-oxoethyl)amino)-2-oxoethyl)carbonyl)nicotinate (**3t**)**

A purification by flash chromatography in petroleum ether : ethyl acetate= 2: 1 to give **3t** as yellow oil (50.5 mg, 99%, *E: Z* = 5: 1). (Note! The structure and NMR data of major *E*-rotamer were shown.)

**<sup>1</sup>H NMR (400 MHz, Chloroform-*d*)**  $\delta$  8.71 (d, *J* = 2.0 Hz, 1H), 8.20 (dd, *J* = 8.2, 2.1 Hz, 1H), 7.85 (d, *J* = 15.9 Hz, 1H), 7.75 (d, *J* = 8.2 Hz, 1H), 7.67 (t, *J* = 5.4 Hz, 1H), 7.32 (p, *J* = 4.0 Hz, 1H), 7.20 (d, *J* = 5.3 Hz, 2H), 6.24 (d, *J* = 15.9 Hz, 1H), 4.52 (d, *J* = 14.2 Hz, 1H), 4.27 – 4.17 (m, 4H), 4.09 – 4.02 (m, 1H), 3.87 (s, 3H), 3.77 (s, 3H), 2.63 – 2.55 (m, 2H), 1.31 (t, *J* = 7.1 Hz, 3H), 1.13 (t, *J* = 7.5 Hz, 3H).

**<sup>13</sup>C NMR (101 MHz, Chloroform-*d*)**  $\delta$  170.16, 169.08, 168.05, 166.55, 155.71, 149.00, 142.03, 140.50, 140.45, 137.53, 132.79, 130.54, 128.86, 126.49, 124.71, 123.55, 121.29, 60.73, 55.88, 52.63, 52.43, 41.45, 23.53, 14.39, 13.87.

**HRMS (ESI)** *m/z*: [M + H]<sup>+</sup> Calcd for C<sub>26</sub>H<sub>30</sub>N<sub>3</sub>O<sub>8</sub> 512.2028; found: 512.2030

**HPLC**: AS-H column (hexane/isopropanol = 60/40, rate = 1.0 mL/min,  $\lambda$  = 254 nm) *tr* = 38.4 min (minor), 14.5 min (major), 94% ee.

**$[\alpha]_D^{20}$**  = -126.0 (c = 1.0, CHCl<sub>3</sub>).

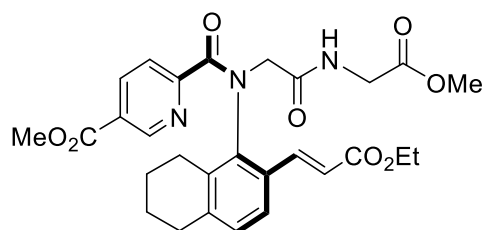

**Methyl (E)-6-((2-(3-ethoxy-3-oxoprop-1-en-1-yl)-5,6,7,8-tetrahydronaphthalen-1-yl)(2-((2-methoxy-2-oxoethyl)amino)-2-oxoethyl)carbamoyl)nicotinate (3u)**

A purification by flash chromatography in petroleum ether : ethyl acetate = 2 : 1 to give **3u** as yellow oil (46.1 mg, 86%, *E*:*Z* = 5 : 1). (Note! The structure and NMR data of major *E*-rotamer were shown.)

**<sup>1</sup>H NMR (400 MHz, Chloroform-*d*)**  $\delta$  8.73 (d, *J* = 1.2 Hz, 1H), 8.17 (dd, *J* = 8.2, 2.1 Hz, 1H), 7.79 – 7.70 (m, 2H), 7.68 (d, *J* = 8.1 Hz, 1H), 7.19 (d, *J* = 8.0 Hz, 1H), 6.94 (d, *J* = 8.1 Hz, 1H), 6.17 (d, *J* = 15.8 Hz, 1H), 4.60 (d, *J* = 14.1 Hz, 1H), 4.23 – 4.11 (m, 4H), 4.07 – 4.02 (m, 1H), 3.86 (s, 3H), 3.76 (s, 3H), 2.82 – 2.77 (m, 1H), 2.69 (q, *J* = 6.4 Hz, 2H), 2.60 (d, *J* = 7.1 Hz, 1H), 1.83 – 1.65 (m, 4H), 1.30 (t, *J* = 7.1 Hz, 3H).

**<sup>13</sup>C NMR (101 MHz, Chloroform-*d*)**  $\delta$  170.12, 169.11, 168.18, 166.68, 155.94, 149.08, 141.67, 140.01, 137.46, 136.14, 129.93, 129.80, 126.41, 123.65, 123.16, 120.01, 60.59, 55.19, 52.60, 52.37, 41.44, 29.70, 25.67, 22.58, 22.35.

**HRMS (ESI)** *m/z*: [M + Na]<sup>+</sup> Calcd for C<sub>28</sub>H<sub>31</sub>N<sub>3</sub>NaO<sub>8</sub> 560.2003; found: 560.2003.

**HPLC**: AD-H column (hexane/isopropanol = 50/50, rate = 1.0 mL/min,  $\lambda$  = 254 nm) *tr* = 37.6 min (minor), 15.6 min (major), >99% ee.

**$[\alpha]_D^{20}$**  = -61.2 (c = 1.0, CHCl<sub>3</sub>).



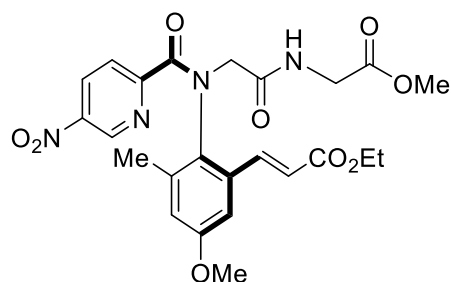

**Ethyl (*E*)-3-(5-methoxy-2-(*N*-(2-((2-methoxy-2-oxoethyl)amino)-2-oxoethyl)-5-nitrophenyl)acrylate (3v)**

A purification by flash chromatography in petroleum ether : ethyl acetate = 2: 1 to give **3v** as yellow oil (23.6 mg, 46%, *E*: *Z* = 11: 1). (Note! The structure and NMR data of major *E*-rotamer were shown.)

**<sup>1</sup>H NMR (400 MHz, Chloroform-*d*)**  $\delta$  8.98 (d, *J* = 2.5 Hz, 1H), 8.40 (dd, *J* = 8.6, 2.5 Hz, 1H), 7.85 (d, *J* = 8.6 Hz, 1H), 7.78 (d, *J* = 15.8 Hz, 1H), 7.53 (t, *J* = 5.3 Hz, 1H), 6.78 (d, *J* = 2.9 Hz, 1H), 6.68 (d, *J* = 2.8 Hz, 1H), 6.23 (d, *J* = 15.8 Hz, 1H), 4.52 (d, *J* = 14.1 Hz, 1H), 4.26 – 4.20 (m, 3H), 4.17 (d, *J* = 5.8 Hz, 1H), 4.09 – 4.01 (m, 1H), 3.78 (s, 3H), 3.74 (s, 3H), 2.25 (s, 3H), 1.32 (t, *J* = 7.1 Hz, 3H).

**<sup>13</sup>C NMR (101 MHz, Chloroform-*d*)**  $\delta$  170.17, 168.16, 167.79, 166.40, 159.18, 157.76, 143.87, 143.43, 139.86, 138.40, 133.80, 133.70, 131.73, 124.11, 121.62, 118.57, 109.20, 60.87, 55.47, 52.50, 41.45, 18.76, 14.39.

**HRMS (ESI)** *m/z*: [M + Na]<sup>+</sup> Calcd for C<sub>24</sub>H<sub>26</sub>N<sub>4</sub>NaO<sub>9</sub> 537.1592; found: 537.1591.

**HPLC**: OD-H column (hexane/isopropanol = 50/50, rate = 1.0 mL/min,  $\lambda$  = 254 nm) *tr* = 17.9 min (minor), 31.0 min (major), 98% ee.

**[ $\alpha$ ]<sub>D</sub><sup>20</sup>** = -130.2 (*c* = 1.0, CHCl<sub>3</sub>).

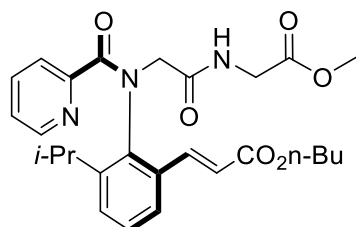

**Butyl (*E*)-3-(3-isopropyl-2-(*N*-(2-((2-methoxy-2-oxoethyl)amino)-2-oxoethyl)phenyl)acrylate (4b)**

A purification by flash chromatography in petroleum ether : ethyl acetate = 2: 1 to give **4b** as yellow

oil (36.3 mg, 73%, *E*: *Z* = 2: 1). (Note! The structure and NMR data of major *E*-rotamer were shown.)

**<sup>1</sup>H NMR (400 MHz, Chloroform-*d*)**  $\delta$  8.13 (d, *J* = 4.6 Hz, 1H), 7.90 (d, *J* = 15.9 Hz, 1H), 7.85 (t, *J* = 5.5 Hz, 1H), 7.73 (d, *J* = 8.0 Hz, 1H), 7.62 (td, *J* = 7.7, 1.7 Hz, 1H), 7.36 (dd, *J* = 7.3, 1.9 Hz, 1H), 7.25 – 7.16 (m, 2H), 7.12 (dd, *J* = 7.6, 4.7 Hz, 1H), 6.29 (d, *J* = 15.9 Hz, 1H), 4.35 (d, *J* = 14.7 Hz, 1H), 4.19 – 4.11 (m, 4H), 4.05 (dd, *J* = 18.3, 4.8 Hz, 1H), 3.77 (s, 3H), 3.01 (q, *J* = 6.8 Hz, 1H), 1.70 – 1.63 (m, 2H), 1.46 – 1.38 (m, 2H), 1.12 (d, *J* = 6.8 Hz, 3H), 0.95 (t, *J* = 7.4 Hz, 3H), 0.78 (d, *J* = 6.7 Hz, 3H).

**<sup>13</sup>C NMR (101 MHz, Chloroform-*d*)**  $\delta$  170.18, 168.46, 166.76, 147.87, 146.60, 141.14, 136.36, 132.82, 128.82, 128.77, 125.02, 124.80, 124.51, 121.13, 64.61, 56.72, 52.43, 41.42, 30.82, 28.28, 24.98, 23.10, 19.28, 13.87.

**HRMS (ESI)** *m/z*: [M + Na]<sup>+</sup> Calcd for C<sub>27</sub>H<sub>33</sub>N<sub>3</sub>NaO<sub>6</sub> 518.2261; found: 518.2264.

**HPLC**: AD-H column (hexane/isopropanol = 80/20, rate = 1.0 mL/min,  $\lambda$  = 254 nm) *tr* = 42.1 min (minor), 29.0 min (major), 94% ee.

**[ $\alpha$ ]<sub>D</sub><sup>20</sup>** = -110.6 (*c* = 1.0, CHCl<sub>3</sub>).

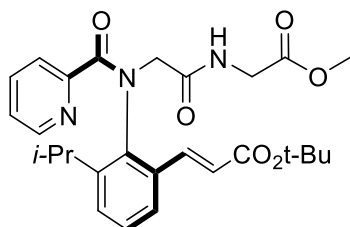

**Tert-butyl (*E*)-3-(3-isopropyl-2-(*N*-(2-((2-methoxy-2-oxoethyl)amino)-2-oxoethyl)picolinamido)phenyl)acrylate (**4c**)**

A purification by flash chromatography in petroleum ether : ethyl acetate = 2: 1 to give **4c** as yellow oil (20.8 mg, 42%, *E*: *Z* = 2: 1). (Note! The structure and NMR data of major *E*-rotamer were shown.)

**<sup>1</sup>H NMR (400 MHz, Chloroform-*d*)**  $\delta$  8.14 (d, *J* = 4.3 Hz, 1H), 7.88 – 7.78 (m, 2H), 7.72 (t, *J* = 7.2 Hz, 1H), 7.62 (td, *J* = 7.8, 1.8 Hz, 1H), 7.34 (dd, *J* = 7.3, 1.9 Hz, 1H), 7.21 (t, *J* = 7.6 Hz, 1H), 7.17 (dd, *J* = 7.9, 1.9 Hz, 1H), 7.12 (ddd, *J* = 7.7, 4.7, 1.2 Hz, 1H), 6.22 (d, *J* = 15.8 Hz, 1H), 4.40 – 4.34 (m, 2H), 4.14 (d, *J* = 3.3 Hz, 1H), 4.06 (dd, *J* = 18.3, 4.8 Hz, 1H), 3.78 (s, 3H), 3.04 – 2.99 (m, 1H), 1.51 (s, 9H), 1.12 (d, *J* = 6.8 Hz, 3H), 0.78 (d, *J* = 6.7 Hz, 3H).

**$^{13}\text{C}$  NMR (101 MHz, Chloroform-*d*)**  $\delta$  170.18, 168.52, 165.94, 147.92, 146.52, 140.12, 139.38, 136.32, 132.99, 128.73, 128.57, 124.99, 124.80, 124.49, 123.08, 80.73, 56.73, 52.42, 41.46, 28.56, 28.28, 25.01, 23.09.

**HRMS (ESI)**  $m/z$ :  $[\text{M} + \text{Na}]^+$  Calcd for  $\text{C}_{27}\text{H}_{33}\text{N}_3\text{NaO}_6$  518.2261; found: 518.2662.

**HPLC**: AD-H column (hexane/isopropanol = 70/30, rate = 1.0 mL/min,  $\lambda$  = 254 nm)  $t_r$  = 16.1 min (minor), 8.6 min (major), 96% ee.

**$[\alpha]_D^{20}$**  = -94.1 ( $c$  = 1.0,  $\text{CHCl}_3$ ).

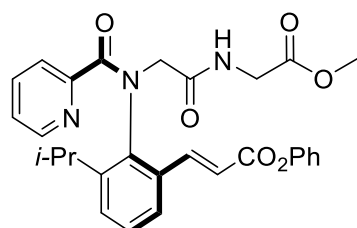

**Phenyl (*E*)-3-(3-isopropyl-2-(*N*-(2-((2-methoxy-2-oxoethyl)amino)-2-oxoethyl)picolinamido)phenyl)acrylate (4d)**

A purification by flash chromatography in petroleum ether : ethyl acetate = 2 : 1 to give **4d** as yellow oil (35.9 mg, 70%, *E*: *Z* = 2 : 1). (Note! The structure and NMR data of major *E*-rotamer were shown.)

**$^1\text{H}$  NMR (400 MHz, Chloroform-*d*)**  $\delta$  8.13 (d,  $J$  = 4.7 Hz, 1H), 8.08 (d,  $J$  = 15.9 Hz, 1H), 7.98 – 7.92 (m, 1H), 7.86 (t,  $J$  = 5.4 Hz, 1H), 7.80 (d,  $J$  = 7.9 Hz, 1H), 7.65 (td,  $J$  = 3.7, 1.4 Hz, 1H), 7.57 – 7.48 (m, 1H), 7.45 – 7.37 (m, 4H), 7.15 (d,  $J$  = 7.7 Hz, 3H), 6.47 (d,  $J$  = 15.9 Hz, 1H), 4.57 (d,  $J$  = 14.1 Hz, 1H), 4.28 (d,  $J$  = 14.2 Hz, 1H), 4.13 (dd,  $J$  = 15.2, 6.4 Hz, 1H), 4.00 (dd,  $J$  = 18.3, 4.7 Hz, 1H), 3.68 (s, 3H), 3.06 – 3.00 (m, 1H), 1.16 (d,  $J$  = 6.8 Hz, 3H), 0.84 (d,  $J$  = 6.7 Hz, 3H).

**$^{13}\text{C}$  NMR (101 MHz, Chloroform-*d*)**  $\delta$  170.08, 169.83, 168.39, 165.09, 151.92, 150.80, 147.81, 146.66, 143.11, 140.60, 136.45, 132.54, 129.53, 129.34, 128.85, 125.93, 125.09, 124.85, 124.64, 121.73, 119.98, 56.80, 52.37, 41.45, 28.34, 24.89, 23.14.

**HRMS (ESI)**  $m/z$ :  $[\text{M} + \text{Na}]^+$  Calcd for  $\text{C}_{29}\text{H}_{29}\text{N}_3\text{NaO}_6$  538.1948; found: 538.1950.

**HPLC**: AD-H column (hexane/isopropanol = 50/50, rate = 1.0 mL/min,  $\lambda$  = 254 nm)  $t_r$  = 19.7 min (minor), 9.2 min (major), 95% ee.

**$[\alpha]_D^{20}$**  = -164.7 ( $c$  = 1.0,  $\text{CHCl}_3$ ).

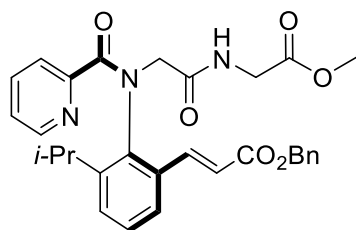

**Benzyl (*E*)-3-(3-isopropyl-2-(*N*-(2-((2-methoxy-2-oxoethyl)amino)-2-oxoethyl)picolinamido)phenyl)acrylate (4e)**

A purification by flash chromatography in petroleum ether : ethyl acetate = 2 : 1 to give **4e** as yellow oil (40.2 mg, 76%, *E*: *Z* = 2 : 1). (Note! The structure and NMR data of major *E*-rotamer were shown.)

**<sup>1</sup>H NMR (400 MHz, Chloroform-*d*)**  $\delta$  8.11 (d, *J* = 4.6 Hz, 1H), 7.97 (d, *J* = 11.4 Hz, 1H), 7.85 – 7.81 (m, 1H), 7.72 (d, *J* = 7.8 Hz, 1H), 7.63 – 7.50 (m, 2H), 7.41 – 7.38 (m, 3H), 7.34 (d, *J* = 6.3 Hz, 3H), 7.22 (d, *J* = 4.6 Hz, 1H), 7.11 (dd, *J* = 7.4, 4.8 Hz, 1H), 6.32 (d, *J* = 15.9 Hz, 1H), 5.22 (s, 2H), 4.46 (d, *J* = 14.2 Hz, 1H), 4.32 (d, *J* = 14.2 Hz, 1H), 4.13 (dd, *J* = 12.4, 5.7 Hz, 1H), 3.99 (dd, *J* = 18.3, 4.7 Hz, 1H), 3.77 (s, 3H), 3.06 – 3.00 (m, 1H), 1.13 (d, *J* = 6.8 Hz, 3H), 0.81 (d, *J* = 6.7 Hz, 3H).

**<sup>13</sup>C NMR (101 MHz, Chloroform-*d*)**  $\delta$  170.16, 169.86, 168.41, 166.43, 151.95, 147.82, 146.60, 141.78, 140.37, 138.59, 136.38, 136.08, 132.69, 128.99, 128.74, 128.39, 128.23, 125.02, 124.74, 124.53, 120.61, 66.47, 56.73, 52.42, 41.37, 28.30, 24.91, 23.14.

**HRMS (ESI)** *m/z*: [M + Na]<sup>+</sup> Calcd for C<sub>30</sub>H<sub>31</sub>N<sub>3</sub>NaO<sub>6</sub> 552.2105; found: 552.2107.

**HPLC**: AD-H column (hexane/isopropanol = 50/50, rate = 1.0 mL/min,  $\lambda$  = 254 nm) *tr* = 22.0 min (minor), 11.2 min (major), 95% ee.

**[ $\alpha$ ]<sub>D</sub><sup>20</sup>** = -87.5 (*c* = 1.0, CHCl<sub>3</sub>).

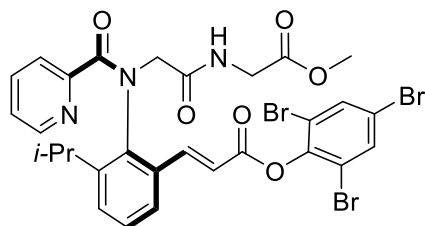

**2,4,6-tribromophenyl (E)-3-(3-isopropyl-2-(N-(2-((2-methoxy-2-oxoethyl)amino)-2-oxoethyl)picolinamido)phenyl)acrylate (4f)**

A purification by flash chromatography in petroleum ether : ethyl acetate= 2: 1 to give **4f** as yellow oil (39.1 mg, 52%, *E*: *Z* = 2: 1). (Note! The structure and NMR data of major *E*-rotamer were shown.)

**<sup>1</sup>H NMR (400 MHz, Chloroform-*d*)**  $\delta$  8.16 (d, *J* = 15.9 Hz, 1H), 8.11 (d, *J* = 3.2 Hz, 1H), 7.86 (t, *J* = 5.4 Hz, 1H), 7.82 (d, *J* = 7.8 Hz, 1H), 7.73 (s, 2H), 7.64 (td, *J* = 7.8, 1.8 Hz, 1H), 7.57 – 7.51 (m, 1H), 7.45 (t, *J* = 4.6 Hz, 1H), 7.29 (s, 1H), 7.13 (ddd, *J* = 7.7, 4.8, 1.2 Hz, 1H), 6.46 (d, *J* = 15.9 Hz, 1H), 4.54 (d, *J* = 14.1 Hz, 1H), 4.33 (d, *J* = 14.1 Hz, 1H), 4.20 (dd, *J* = 18.3, 6.1 Hz, 1H), 3.99 (dd, *J* = 18.3, 4.6 Hz, 1H), 3.70 (s, 3H), 3.09 – 3.01 (m, 1H), 1.17 (d, *J* = 6.7 Hz, 3H), 0.87 (d, *J* = 6.8 Hz, 3H).

**<sup>13</sup>C NMR (101 MHz, Chloroform-*d*)**  $\delta$  170.69, 170.09, 168.37, 162.53, 151.86, 147.74, 146.84, 145.08, 140.72, 136.47, 134.92, 132.21, 129.82, 128.88, 125.13, 125.00, 124.78, 119.94, 118.76, 118.17, 56.82, 52.41, 41.44, 28.39, 24.83, 23.21.

**HRMS (ESI)** *m/z*: [M + Na]<sup>+</sup> Calcd for C<sub>29</sub>H<sub>26</sub>Br<sub>3</sub>N<sub>3</sub>NaO<sub>6</sub> 771.9264; found: 771.9263.

**HPLC**: AD-H column (hexane/isopropanol = 50/50, rate = 1.0 mL/min,  $\lambda$  = 254 nm) *tr* = 19.3 min (minor), 26.1 min (major), 97% ee.

**$[\alpha]_D^{20}$**  = -71.6 (*c* = 1.0, CHCl<sub>3</sub>).

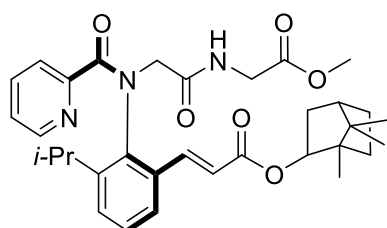

**1,7,7-trimethylbicyclo[2.2.1]heptan-2-yl (E)-3-(3-isopropyl-2-(N-(2-((2-methoxy-2-oxoethyl)amino)-2-oxoethyl)picolinamido)phenyl)acrylate (4g)**

A purification by flash chromatography in petroleum ether: ethyl acetate= 2: 1 to give **4g** as yellow

oil (45.5 mg, 79%, *E*: *Z* = 2: 1). (Note! The structure and NMR data of major *E*-rotamer were shown.)

**<sup>1</sup>H NMR (400 MHz, Chloroform-*d*)**  $\delta$  8.13 (d, *J* = 4.7 Hz, 1H), 7.97 (dd, *J* = 6.9, 1.7 Hz, 1H), 7.87 (dd, *J* = 15.9, 2.6 Hz, 1H), 7.72 (d, *J* = 7.2 Hz, 1H), 7.62 (tt, *J* = 7.7, 1.8 Hz, 1H), 7.39 – 7.35 (m, 1H), 7.22 (t, *J* = 7.6 Hz, 1H), 7.18 (dd, *J* = 8.0, 1.8 Hz, 1H), 7.12 (ddd, *J* = 7.7, 4.8, 1.2 Hz, 1H), 6.26 (dd, *J* = 15.9, 5.3 Hz, 1H), 4.76 (dt, *J* = 7.2, 3.4 Hz, 1H), 4.54 (dd, *J* = 14.2, 5.9 Hz, 1H), 4.22 (d, *J* = 3.4 Hz, 1H), 4.16 (d, *J* = 5.8 Hz, 1H), 4.05 (ddd, *J* = 18.0, 4.8, 2.0 Hz, 1H), 3.78 (s, 3H), 3.08 – 3.01 (m, 1H), 1.89 – 1.69 (m, 6H), 1.60 – 1.53 (m, 1H), 1.10 (d, *J* = 6.8 Hz, 3H), 1.01 (d, *J* = 8.8 Hz, 3H), 0.88 (s, 3H), 0.84 (s, 3H), 0.78 (s, 3H).

**<sup>13</sup>C NMR (101 MHz, Chloroform-*d*)**  $\delta$  170.17, 168.52, 166.14, 147.89, 140.82, 136.35, 132.77, 128.74, 126.32, 125.02, 124.78, 121.69, 121.64, 56.72, 52.45, 48.94, 47.12, 45.11, 41.41, 38.96, 33.80, 28.28, 27.17, 25.03, 23.12, 20.21, 20.10, 11.67.

**HRMS (ESI)** *m/z*: [M + Na]<sup>+</sup> Calcd for C<sub>33</sub>H<sub>41</sub>N<sub>3</sub>NaO<sub>6</sub> 598.2887; found: 598.2887.

**HPLC**: AD-H column (hexane/isopropanol = 50/50, rate = 1.0 mL/min,  $\lambda$  = 254 nm) *tr* = 13.7 min (minor), 6.3 min (major), 95% ee.

**[ $\alpha$ ]<sub>D</sub><sup>20</sup>** = -118.8 (*c* = 1.0, CHCl<sub>3</sub>).

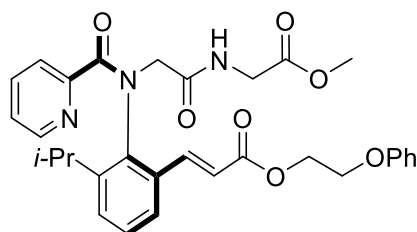

**2-phenoxyethyl (*E*)-3-(3-isopropyl-2-(*N*-(2-((2-methoxy-2-oxoethyl)amino)-2-oxoethyl)picolinamido)phenyl)acrylate (4h)**

A purification by flash chromatography in petroleum ether : ethyl acetate = 1: 2 to give **4h** as yellow oil (44.3 mg, 79%, *E*: *Z* = 2: 1). (Note! The structure and NMR data of major *E*-rotamer were shown.)

**<sup>1</sup>H NMR (400 MHz, Chloroform-*d*)**  $\delta$  8.11 (d, *J* = 4.6 Hz, 1H), 7.99 – 7.87 (m, 2H), 7.73 (d, *J* = 7.8 Hz, 1H), 7.62 – 7.48 (m, 2H), 7.36 (dd, *J* = 7.0, 2.1 Hz, 1H), 7.25 – 7.17 (m, 2H), 7.11 (ddd, *J* = 7.6, 4.7, 1.2 Hz, 1H), 6.98 (d, *J* = 7.4 Hz, 1H), 6.94 (d, *J* = 7.8 Hz, 2H), 6.89 (d, *J* = 8.1 Hz, 1H), 6.34 (d, *J* = 15.9 Hz, 1H), 4.58 – 4.50 (m, 2H), 4.44 (d, *J* = 14.2 Hz, 1H), 4.32 (d, *J* = 14.2 Hz,

1H), 4.23 (t,  $J = 4.8$  Hz, 2H), 4.14 (d,  $J = 5.0$  Hz, 1H), 4.06 (dd,  $J = 18.3, 4.7$  Hz, 1H), 3.77 (s, 3H), 3.02 (p,  $J = 6.8$  Hz, 1H), 1.13 (d,  $J = 6.8$  Hz, 3H), 0.80 (d,  $J = 6.7$  Hz, 3H).

**$^{13}\text{C}$  NMR (101 MHz, Chloroform- $d$ )**  $\delta$  170.19, 168.42, 166.54, 158.55, 147.83, 146.61, 141.96, 140.40, 136.39, 132.66, 129.67, 129.02, 128.79, 125.02, 124.79, 124.54, 121.29, 120.38, 114.70, 65.96, 63.04, 56.74, 52.43, 41.42, 28.29, 24.94, 23.11.

**HRMS (ESI)**  $m/z$ :  $[\text{M} + \text{Na}]^+$  Calcd for  $\text{C}_{31}\text{H}_{33}\text{N}_3\text{NaO}_7$  582.2211; found: 582.2212.

**HPLC**: IA column (hexane/isopropanol = 50/50, rate = 1.0 mL/min,  $\lambda = 254$  nm)  $t_r = 21.2$  min (minor), 15.8 min (major), 95% ee.

**$[\alpha]_D^{20}$**  = -92.8 ( $c = 1.0$ ,  $\text{CHCl}_3$ ).

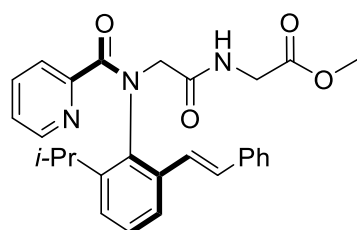

**Methyl (*E*)-*N*-(2-isopropyl-6-styrylphenyl)-*N*-picolinoylglycylglycinate (4i)**

A purification by flash chromatography in petroleum ether : ethyl acetate = 2 : 1 to give **4i** as yellow oil (26.0 mg, 55%,  $E:Z = 3:1$ ). (Note! The structure and NMR data of major  $E$ -rotamer were shown.)

**$^1\text{H}$  NMR (400 MHz, Chloroform- $d$ )**  $\delta$  8.24 (d,  $J = 4.7$  Hz, 1H), 7.74 (t,  $J = 5.5$  Hz, 1H), 7.60 – 7.55 (m, 2H), 7.49 (d,  $J = 7.2$  Hz, 2H), 7.44 – 7.39 (m, 2H), 7.35 (s, 2H), 7.29 (s, 1H), 7.21 (d,  $J = 7.9$  Hz, 1H), 7.12 (ddd,  $J = 6.9, 4.8, 1.5$  Hz, 1H), 7.08 (d,  $J = 8.0$  Hz, 1H), 6.94 (d,  $J = 16.2$  Hz, 1H), 4.52 (d,  $J = 14.4$  Hz, 1H), 4.31 (d,  $J = 14.4$  Hz, 1H), 4.11 – 4.05 (m, 1H), 3.98 – 3.92 (m, 1H), 3.74 (s, 3H), 3.08 – 3.03 (m, 1H), 1.12 (d,  $J = 6.7$  Hz, 3H), 0.81 (d,  $J = 6.8$  Hz, 3H).

**$^{13}\text{C}$  NMR (101 MHz, Chloroform- $d$ )**  $\delta$  170.35, 170.12, 168.65, 152.35, 148.21, 146.33, 138.98, 137.28, 136.15, 132.02, 128.85, 128.77, 126.85, 126.28, 125.27, 124.90, 124.03, 56.41, 52.46, 41.39, 28.32, 25.24, 23.10.

**HRMS (ESI)**  $m/z$ :  $[\text{M} + \text{Na}]^+$  Calcd for  $\text{C}_{28}\text{H}_{29}\text{N}_3\text{NaO}_4$  494.2050; found: 494.2051.

**HPLC**: AD-H column (hexane/isopropanol = 80/20, rate = 1.0 mL/min,  $\lambda = 254$  nm)  $t_r = 26.0$  min (minor), 19.2 min (major), 98% ee.

**$[\alpha]_D^{20}$**  = -196.1 ( $c = 1.0$ ,  $\text{CHCl}_3$ ).

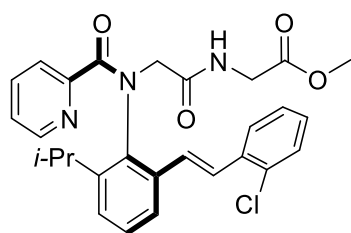

**Methyl (*E*)-*N*-(2-(2-chlorostyryl)-6-isopropylphenyl)-*N*-picolinoylglycylglycinate (4j)**

A purification by flash chromatography in petroleum ether : ethyl acetate= 2: 1 to give **4j** as yellow oil (40.6 mg, 80%, *E*: *Z* = 4: 1). (Note! The structure and NMR data of major *E*-rotamer were shown.)

**<sup>1</sup>H NMR (400 MHz, Chloroform-*d*)**  $\delta$  8.23 (d, *J* = 4.5 Hz, 1H), 7.68 (d, *J* = 1.8 Hz, 2H), 7.64 – 7.50 (m, 3H), 7.45 – 7.41 (m, 1H), 7.39 – 7.33 (m, 3H), 7.25 – 7.19 (m, 2H), 7.15 – 7.09 (m, 2H), 4.51 (d, *J* = 14.3 Hz, 1H), 4.33 (d, *J* = 14.3 Hz, 1H), 4.12 (dd, *J* = 18.3, 5.7 Hz, 1H), 3.99 (dd, *J* = 18.3, 5.0 Hz, 1H), 3.73 (s, 3H), 3.11 – 3.04 (m, 1H), 1.13 (d, *J* = 6.7 Hz, 3H), 0.83 (d, *J* = 6.7 Hz, 3H).

**<sup>13</sup>C NMR (101 MHz, Chloroform-*d*)**  $\delta$  170.36, 170.10, 168.57, 148.16, 146.35, 139.17, 136.21, 135.48, 135.40, 133.59, 129.91, 128.99, 128.85, 128.00, 127.93, 127.16, 126.99, 126.68, 124.91, 124.44, 124.02, 56.40, 52.47, 41.38, 28.33, 25.21, 23.12.

**HRMS (ESI)** *m/z*: [M + Na]<sup>+</sup> Calcd for C<sub>28</sub>H<sub>28</sub>ClN<sub>3</sub>NaO<sub>4</sub> 528.1660; found: 528.1661.

**HPLC**: AD-H column (hexane/isopropanol = 50/50, rate = 1.0 mL/min,  $\lambda$  = 254 nm) *tr* = 11.3 min (minor), 4.9 min (major), 92% ee.

**$[\alpha]_D^{20}$**  = -158.8 (*c* = 1.0, CHCl<sub>3</sub>).

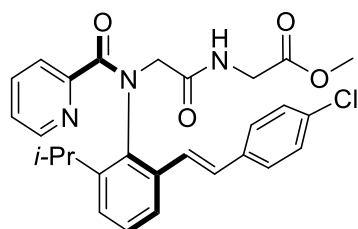

**Methyl (*E*)-*N*-(2-(4-chlorostyryl)-6-isopropylphenyl)-*N*-picolinoylglycylglycinate (4k)**

A purification by flash chromatography in petroleum ether : ethyl acetate= 2: 1 to give **4k** as yellow oil (46.1 mg, 91%, *E*: *Z* = 2: 1). (Note! The structure and NMR data of major *E*-rotamer were shown.)



**<sup>1</sup>H NMR (400 MHz, Chloroform-*d*)**  $\delta$  8.22 (d,  $J = 4.8$  Hz, 1H), 7.62 – 7.54 (m, 2H), 7.41 (t,  $J = 8.6$  Hz, 3H), 7.38 – 7.33 (m, 2H), 7.30 (d,  $J = 8.5$  Hz, 2H), 7.23 (d,  $J = 7.7$  Hz, 1H), 7.12 (ddd,  $J = 7.5, 4.7, 1.4$  Hz, 1H), 7.09 (dd,  $J = 7.8, 1.5$  Hz, 1H), 6.87 (d,  $J = 16.2$  Hz, 1H), 4.43 (d,  $J = 14.4$  Hz, 1H), 4.35 (d,  $J = 14.3$  Hz, 1H), 4.09 (dd,  $J = 18.3, 5.6$  Hz, 1H), 3.95 (dd,  $J = 18.5, 4.9$  Hz, 1H), 3.75 (s, 3H), 3.04 (p,  $J = 6.7$  Hz, 1H), 1.12 (d,  $J = 6.8$  Hz, 3H), 0.81 (d,  $J = 6.7$  Hz, 3H).

**<sup>13</sup>C NMR (101 MHz, Chloroform-*d*)**  $\delta$  170.26, 170.14, 168.54, 148.14, 146.30, 139.14, 136.18, 135.88, 135.42, 133.63, 130.51, 129.00, 128.77, 128.06, 126.47, 126.12, 124.94, 124.11, 123.98, 56.38, 52.49, 41.41, 28.33, 25.21, 23.10.

**HRMS (ESI)**  $m/z$ :  $[M + Na]^+$  Calcd for  $C_{28}H_{28}ClN_3NaO_4$  528.1660; found: 528.1661.

**HPLC**: AD-H column (hexane/isopropanol = 50/50, rate = 1.0 mL/min,  $\lambda = 254$  nm)  $t_r = 12.1$  min (minor), 5.4 min (major), 92% ee.

**$[\alpha]_D^{20}$**  = -223.6 ( $c = 1.0$ ,  $CHCl_3$ ).

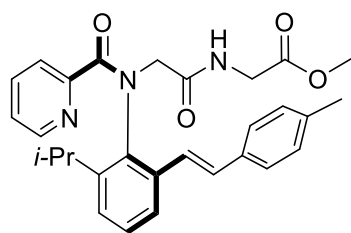

**Methyl (*E*)-*N*-(2-isopropyl-6-(4-methylstyryl)phenyl)-*N*-picolinoylglycylglycinate (**4I**)**

A purification by flash chromatography in petroleum ether : ethyl acetate = 2 : 1 to give **4I** as yellow oil (32.3 mg, 67%,  $E : Z = 3 : 1$ ). (Note! The structure and NMR data of major *E*-rotamer were shown.)

**<sup>1</sup>H NMR (400 MHz, Chloroform-*d*)**  $\delta$  8.25 (d,  $J = 4.6$  Hz, 1H), 7.76 (t,  $J = 5.4$  Hz, 1H), 7.56 (dt,  $J = 9.8, 2.3$  Hz, 2H), 7.39 (dd,  $J = 7.2, 5.4$  Hz, 3H), 7.31 (s, 1H), 7.21 (t,  $J = 7.7$  Hz, 1H), 7.15 (d,  $J = 7.9$  Hz, 2H), 7.11 (d,  $J = 6.5$  Hz, 1H), 7.08 – 7.03 (m, 1H), 6.92 (d,  $J = 16.2$  Hz, 1H), 4.55 (d,  $J = 14.3$  Hz, 1H), 4.28 (d,  $J = 14.4$  Hz, 1H), 4.09 (dd,  $J = 18.3, 5.7$  Hz, 1H), 3.96 (dd,  $J = 18.3, 5.2$  Hz, 1H), 3.75 (s, 3H), 3.06 (d,  $J = 13.5$  Hz, 1H), 2.36 (s, 3H), 1.11 (d,  $J = 6.8$  Hz, 3H), 0.80 (d,  $J = 6.7$  Hz, 3H).

**<sup>13</sup>C NMR (101 MHz, Chloroform-*d*)**  $\delta$  170.40, 170.12, 168.68, 148.25, 146.32, 138.83, 138.12, 136.12, 134.50, 132.02, 129.57, 128.76, 126.77, 126.08, 124.88, 124.14, 124.00, 123.95, 56.40, 52.45, 41.40, 28.32, 25.26, 23.10, 21.42.

**HRMS (ESI)** m/z:  $[M + Na]^+$  Calcd for  $C_{29}H_{31}N_3NaO_4$  508.2207; found: 508.2205.

**HPLC:** AD-H column (hexane/isopropanol = 50/50, rate = 1.0 mL/min,  $\lambda = 254$  nm) tr = 8.5 min (minor), 5.0 min (major), 99% ee.

$[\alpha]_D^{20} = -247.2$  (c = 1.0,  $CHCl_3$ ).

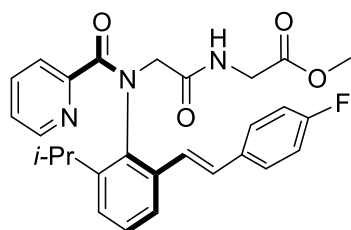

**Methyl (E)-N-(2-(4-fluorostyryl)-6-isopropylphenyl)-N-picolinoylglycylglycinate (4m)**

A purification by flash chromatography in petroleum ether : ethyl acetate = 2 : 1 to give **4m** as yellow oil (27.0 mg, 55%, *E*: *Z* = 3 : 1). (Note! The structure and NMR data of major *E*-rotamer were shown.)

**$^1H$  NMR (400 MHz, Chloroform-*d*)**  $\delta$  8.23 (d,  $J = 4.8$  Hz, 1H), 7.68 (t,  $J = 5.4$  Hz, 1H), 7.61 – 7.55 (m, 2H), 7.46 (dd,  $J = 8.6, 5.5$  Hz, 2H), 7.39 – 7.32 (m, 2H), 7.22 (t,  $J = 7.7$  Hz, 1H), 7.14 – 7.01 (m, 4H), 6.89 (d,  $J = 16.2$  Hz, 1H), 4.46 (d,  $J = 14.4$  Hz, 1H), 4.33 (d,  $J = 14.4$  Hz, 1H), 4.08 (dd,  $J = 12.6, 5.8$  Hz, 1H), 3.96 (dd,  $J = 18.2, 5.1$  Hz, 1H), 3.75 (s, 3H), 3.07 – 3.01 (m, 1H), 1.12 (d,  $J = 6.7$  Hz, 3H), 0.80 (d,  $J = 6.7$  Hz, 3H).

**$^{13}C$  NMR (101 MHz, Chloroform-*d*)**  $\delta$  170.28, 170.12, 168.57, 152.33, 148.17, 146.27, 139.03, 136.14, 133.53, 130.66, 128.76, 128.46, 128.38, 126.27, 125.22, 124.91, 124.06, 123.92, 115.89, 115.68, 56.36, 52.46, 41.38, 28.31, 25.23, 23.08.

**$^{19}F$  NMR (376 MHz, Chloroform-*d*)**  $\delta$  -113.62.

**HRMS (ESI)** m/z:  $[M + Na]^+$  Calcd for  $C_{28}H_{28}FN_3NaO_4$  512.1956; found: 512.1958.

**HPLC:** AD-H column (hexane/isopropanol = 50/50, rate = 1.0 mL/min,  $\lambda = 254$  nm) tr = 5.5 min (minor), 11.3 min (major), 97% ee.

$[\alpha]_D^{20} = -196.1$  (c = 1.0,  $CHCl_3$ ).

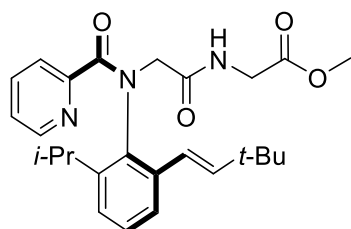

**Methyl (E)-N-(2-(3,3-dimethylbut-1-en-1-yl)-6-isopropylphenyl)-N-picolinoylglycylglycinate**

**(4n)**

A purification by flash chromatography in petroleum ether : ethyl acetate= 2: 1 to give **4n** as yellow oil (20.8 mg, 43%, *E*: *Z* = 5: 1). (Note! The structure and NMR data of major *E*-rotamer were shown.)

**<sup>1</sup>H NMR (400 MHz, Chloroform-*d*)** δ 8.27 (d, *J* = 4.8 Hz, 1H), 7.96 – 7.89 (m, 1H), 7.57 – 7.49 (m, 2H), 7.23 – 7.10 (m, 3H), 7.04 – 6.98 (m, 1H), 6.43 (d, *J* = 16.0 Hz, 1H), 6.07 (d, *J* = 16.0 Hz, 1H), 4.69 (d, *J* = 14.3 Hz, 1H), 4.15 (dd, *J* = 18.2, 5.8 Hz, 1H), 4.11 – 4.01 (m, 2H), 3.77 (s, 3H), 3.09 (d, *J* = 7.3 Hz, 1H), 1.09 (s, 9H), 1.04 (s, 3H), 0.79 (d, *J* = 6.8 Hz, 3H).

**<sup>13</sup>C NMR (101 MHz, Chloroform-*d*)** δ 170.12, 168.99, 148.31, 146.27, 145.77, 138.38, 136.18, 135.97, 128.68, 125.52, 124.80, 124.30, 123.86, 121.28, 56.35, 52.46, 45.77, 41.46, 33.79, 29.57, 28.32, 25.32, 23.11, 8.74.

**HRMS (ESI)** *m/z*: [M + Na]<sup>+</sup> Calcd for C<sub>26</sub>H<sub>33</sub>N<sub>3</sub>NaO<sub>4</sub> 474.2361; found: 474.2363.

**HPLC**: AD-H column (hexane/isopropanol = 70/30, rate = 1.0 mL/min, λ = 254 nm) *tr* = 7.0 min (minor), 4.3 min (major), 98% ee.

**[α]<sub>D</sub><sup>20</sup>** = -92.4 (c = 1.0, CHCl<sub>3</sub>).

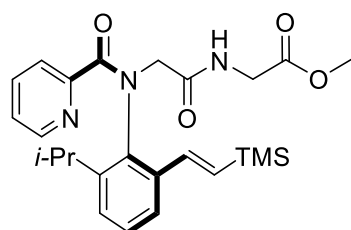

**Methyl (E)-N-(2-isopropyl-6-(2-(trimethylsilyl)vinyl)phenyl)-N-picolinoylglycylglycinate (4o)**

A purification by flash chromatography in petroleum ether : ethyl acetate= 2: 1 to give **4o** as yellow oil (17.7 mg, 38%, *E*: *Z* = 3: 1). (Note! The structure and NMR data of major *E*-rotamer were shown.)

**<sup>1</sup>H NMR (400 MHz, Chloroform-*d*)** δ 8.24 (d, *J* = 4.6 Hz, 1H), 7.86 (t, *J* = 5.1 Hz, 1H), 7.57 – 7.51 (m, 2H), 7.31 – 7.29 (m, 1H), 7.18 (t, *J* = 7.7 Hz, 1H), 7.12 (ddd, *J* = 6.7, 4.9, 2.1 Hz, 1H), 7.08 – 7.05 (m, 1H), 7.02 (d, *J* = 19.0 Hz, 1H), 6.34 (d, *J* = 19.0 Hz, 1H), 4.71 (d, *J* = 14.3 Hz, 1H), 4.16 (dd, *J* = 18.2, 5.8 Hz, 1H), 4.09 – 4.02 (m, 2H), 3.77 (s, 3H), 3.09 (s, 1H), 1.09 (d, *J* = 6.8 Hz, 3H), 0.81 (d, *J* = 6.7 Hz, 3H), 0.13 (s, 9H).

**$^{13}\text{C}$  NMR (101 MHz, Chloroform-*d*)**  $\delta$  170.36, 170.12, 168.82, 148.22, 146.32, 139.92, 138.52, 136.58, 136.03, 134.44, 128.68, 126.53, 124.83, 124.22, 124.01, 56.56, 52.47, 45.79, 41.47, 28.29, 25.26, 23.14, 8.82, -1.19.

**HRMS (ESI)**  $m/z$ :  $[\text{M} + \text{Na}]^+$  Calcd for  $\text{C}_{25}\text{H}_{33}\text{N}_3\text{NaO}_4\text{Si}$  490.2134; found: 490.2133.

**HPLC**: AD-H column (hexane/isopropanol = 50/50, rate = 1.0 mL/min,  $\lambda$  = 254 nm)  $t_r$  = 7.0 min (minor), 4.0 min (major), 96% ee.

**$[\alpha]_{\text{D}}^{20}$**  = -136.2 ( $c$  = 0.5,  $\text{CHCl}_3$ ).

## 2.4 Gram-Scale Synthesis

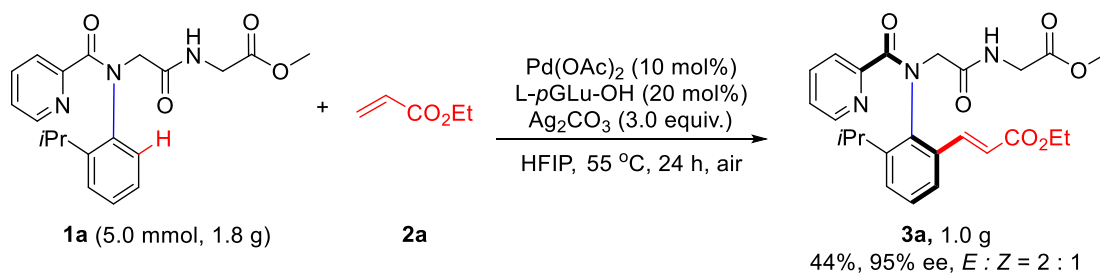

To a 50 mL Schlenk tube was added **1a** (5.0 mmol), **2a** (7.5 mmol), Pd(OAc)<sub>2</sub> (112.2 mg, 10 mol%), L-*p*Glu-OH (129.1 mg, 20 mol%) and Ag<sub>2</sub>CO<sub>3</sub> (4.1 g, 3.0 equiv.), HFIP (20.0 mL) stirred at 55 °C (aluminum heat transfer block) under air for 24 h. After cooling to room temperature, the mixture was diluted with ethyl acetate, the crude mixture was purified by flash column chromatography on silica gel (hexanes/ethyl acetate = 2:1 to 1:1) affording the desired product **3a** as yellow oil (**3a**, 1.0 g, 44% yield, 95% ee, *E*: *Z* = 2: 1). (Note! The structure and NMR data of major *E*-rotamer were shown.)

### 3. References

- [1] Y.J. Wu, P.P. Xie, G. Zhou, Q.J. Yao, X. Hong, B.F. Shi, *Chem. Sci.* 12 (2021) 9391-9397.

## 4. NMR Spectra

### 1k-<sup>1</sup>H NMR

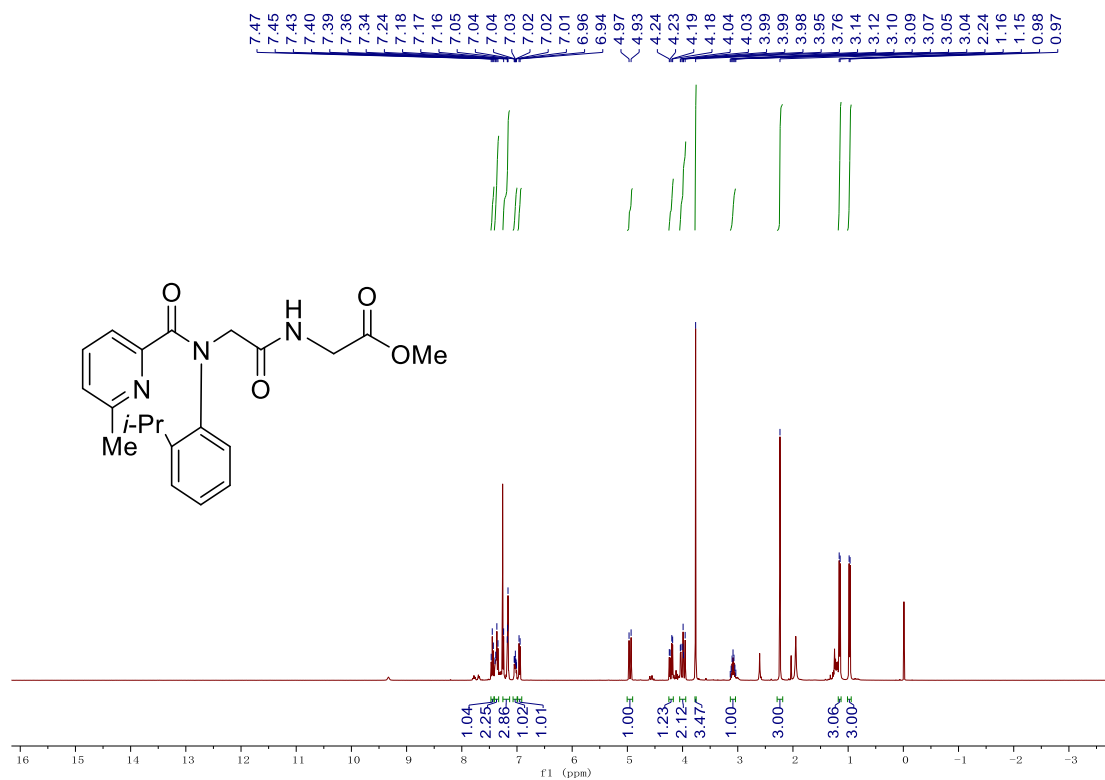

### 1k-<sup>13</sup>C NMR

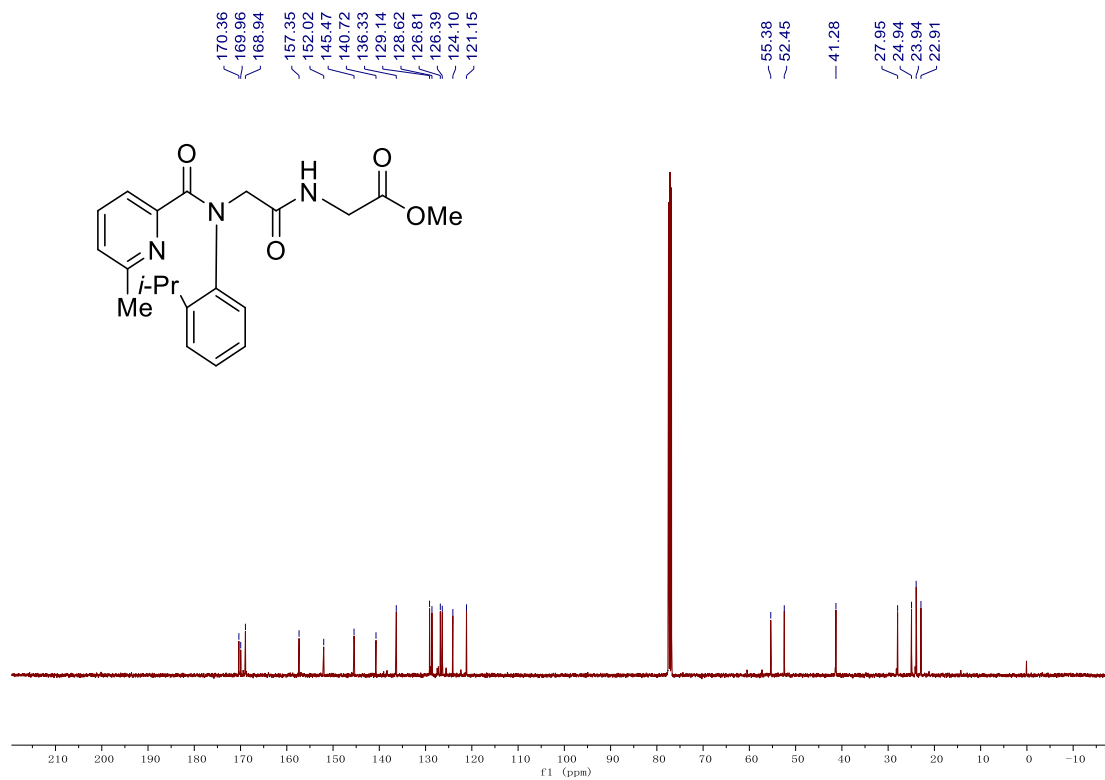

### 1H NMR

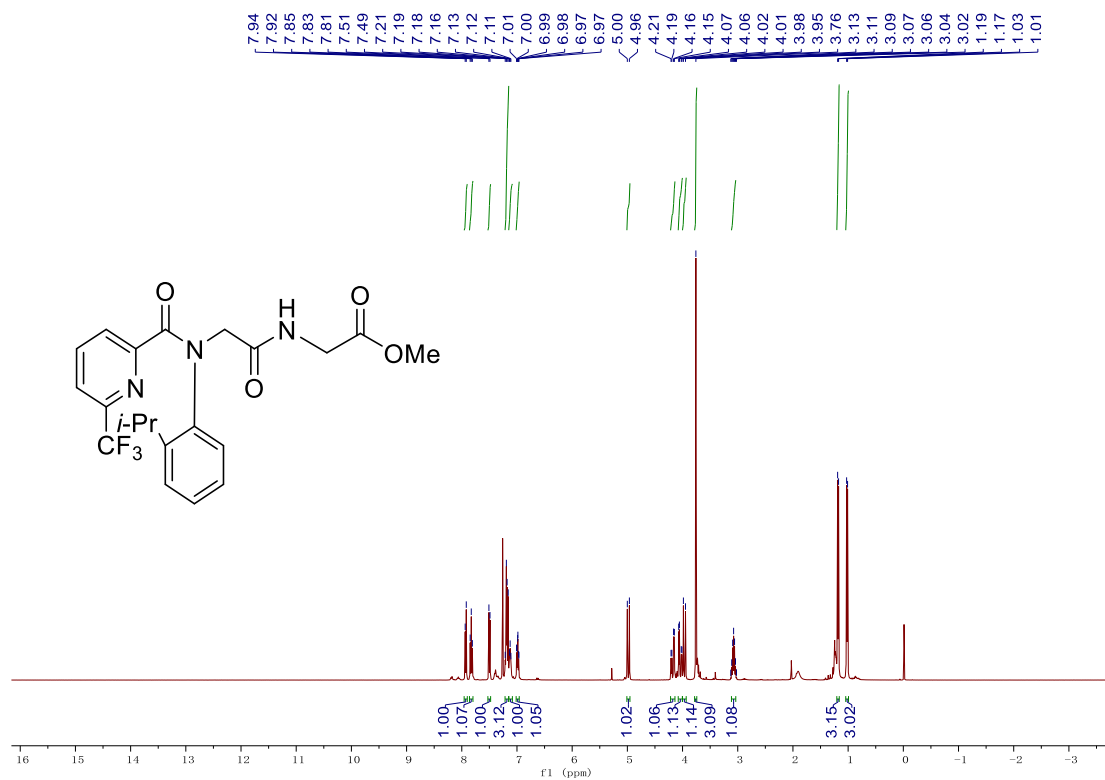

### 13C NMR

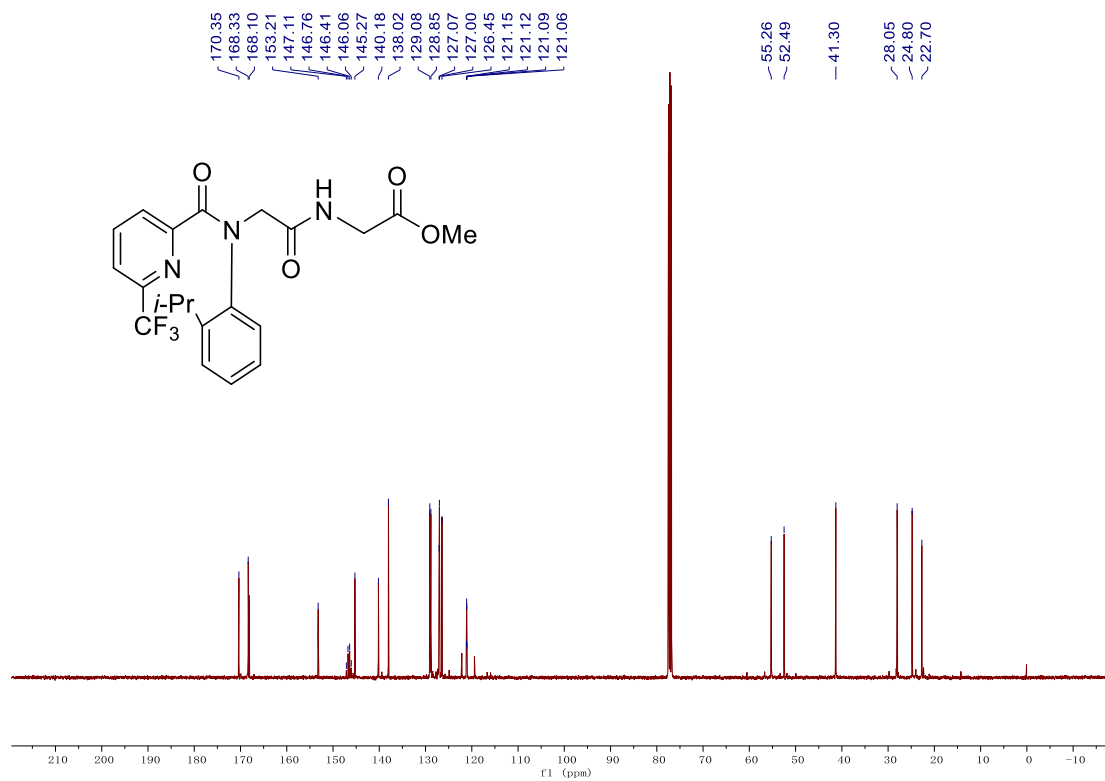



11-<sup>19</sup>F

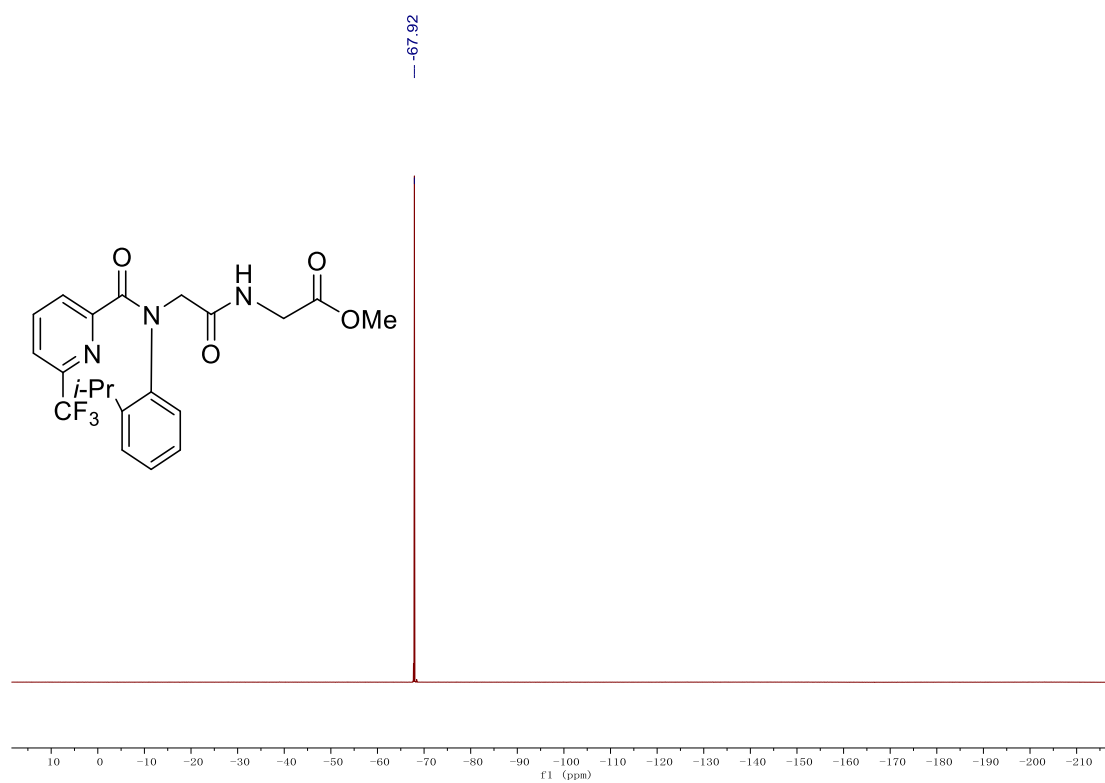

### 3a-<sup>1</sup>H NMR

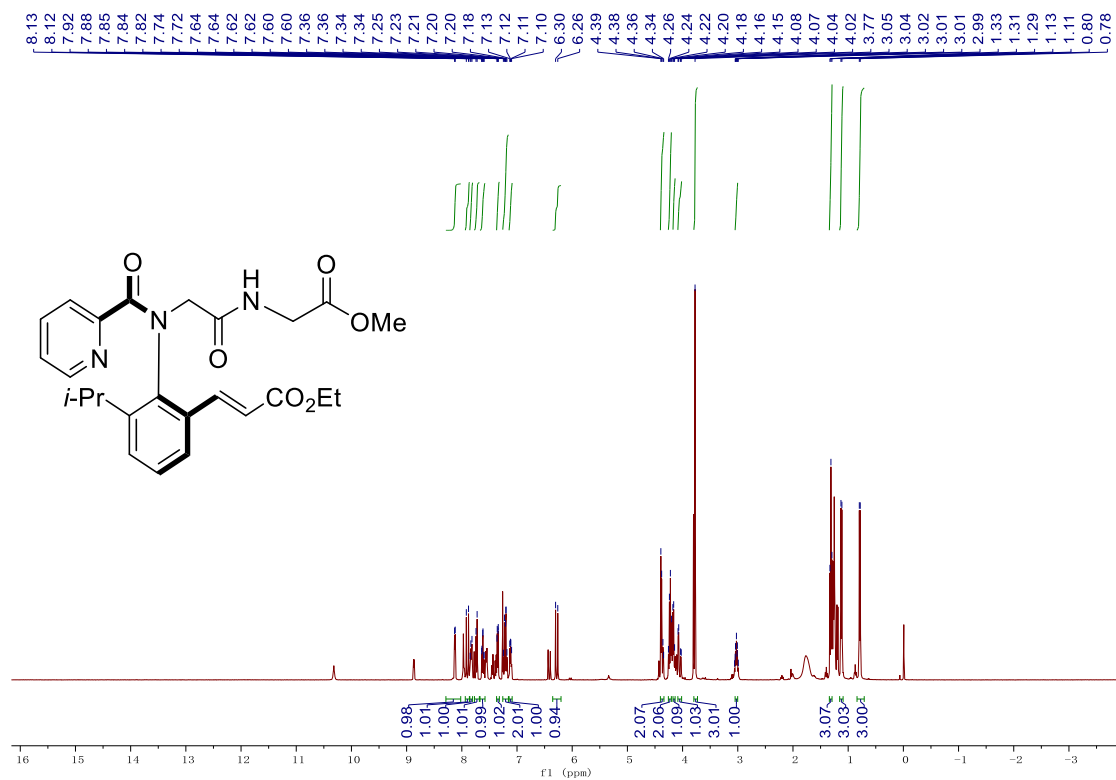

### 3a-<sup>13</sup>C NMR

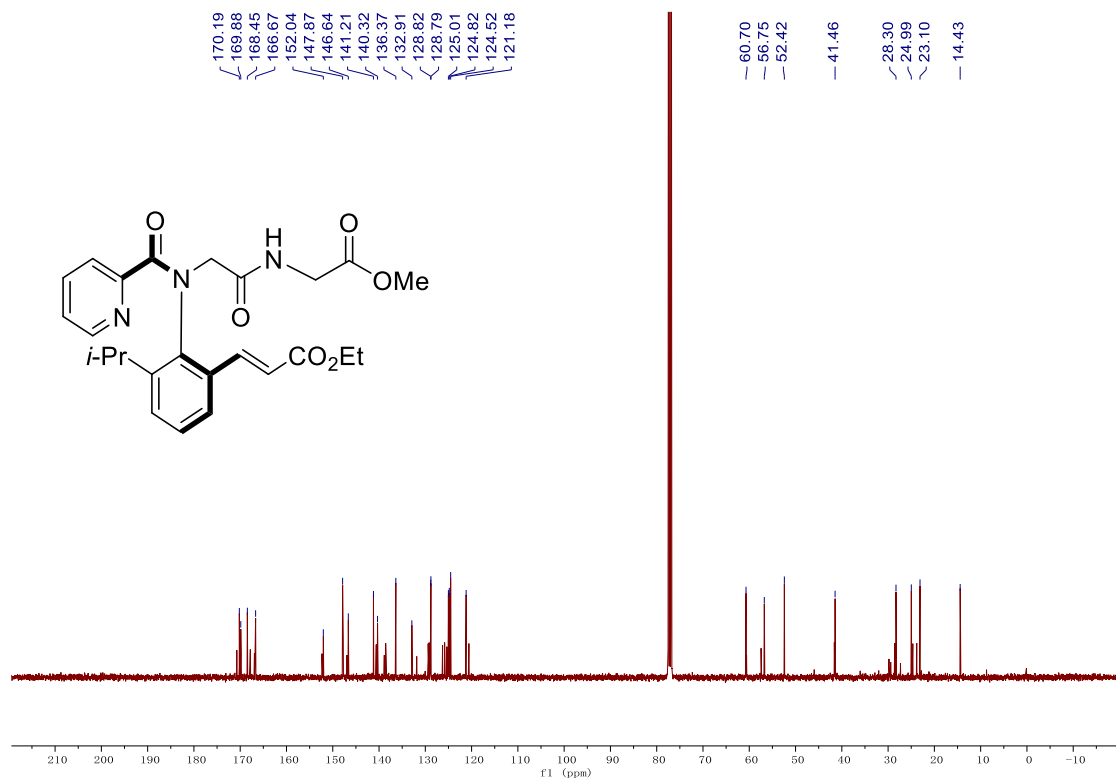

### 3b-<sup>1</sup>H NMR

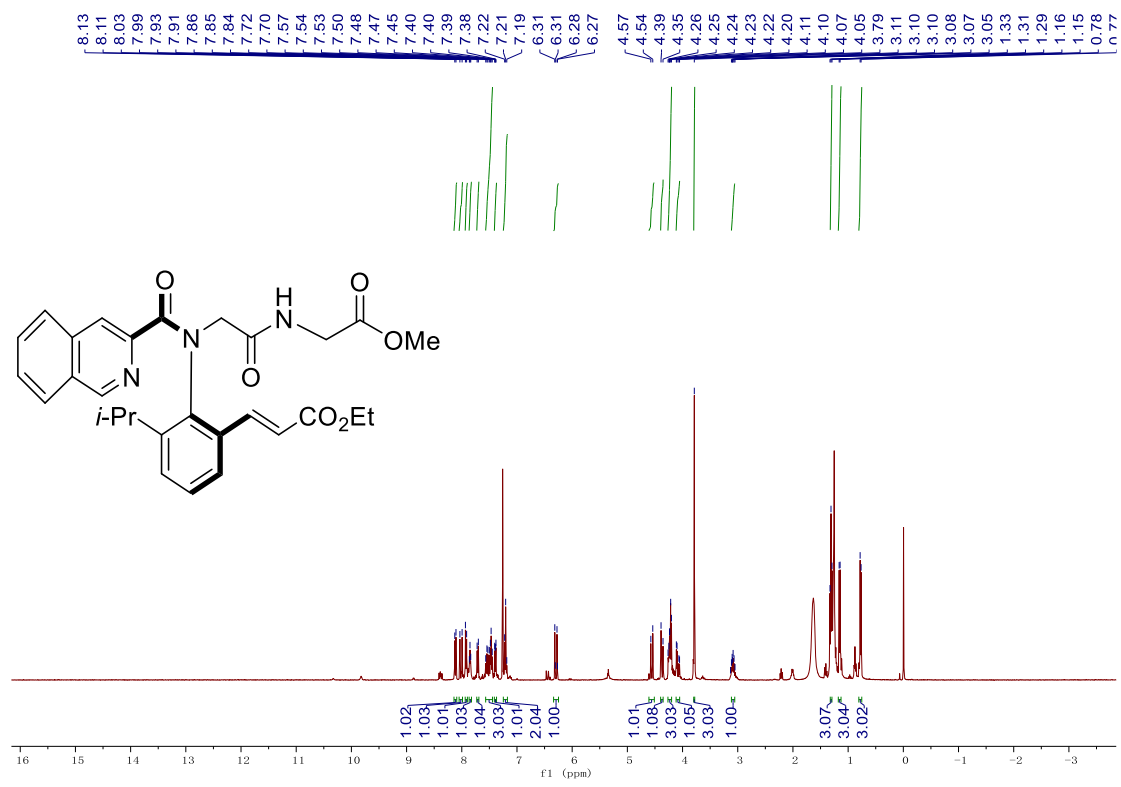

**3b-<sup>13</sup>C NMR**

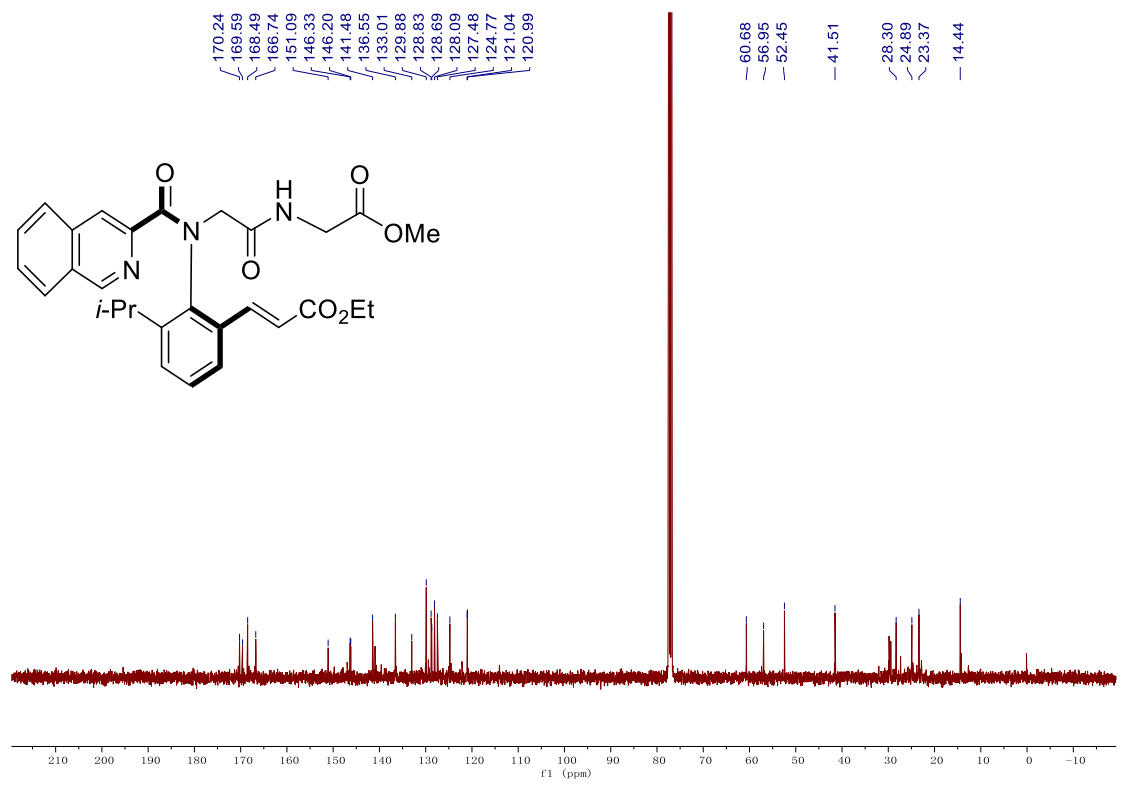

### 3c-<sup>1</sup>H NMR

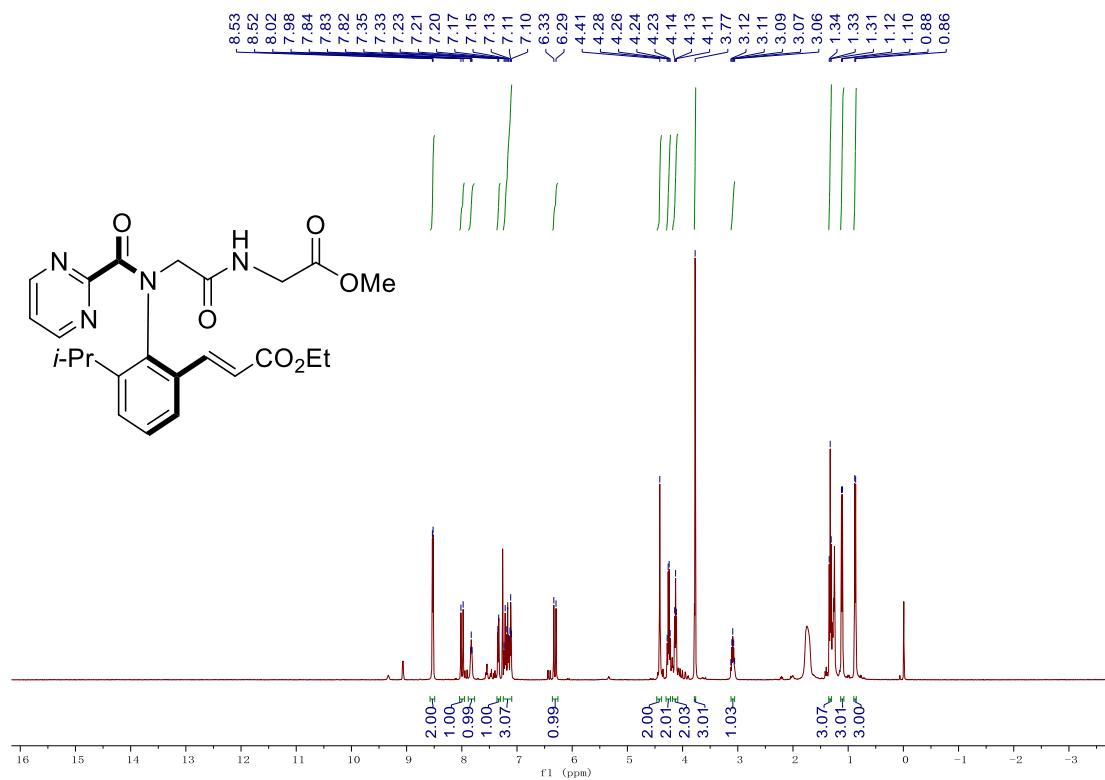

### 3c-<sup>13</sup>C NMR

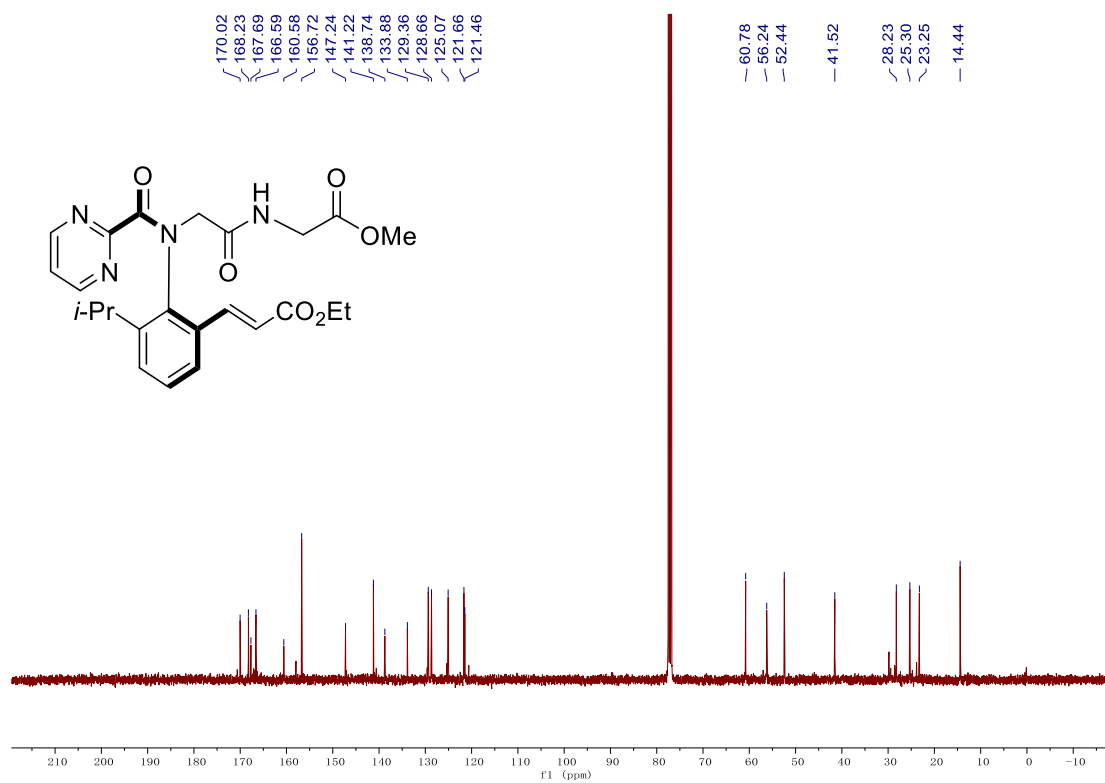

### 3d-<sup>1</sup>H NMR

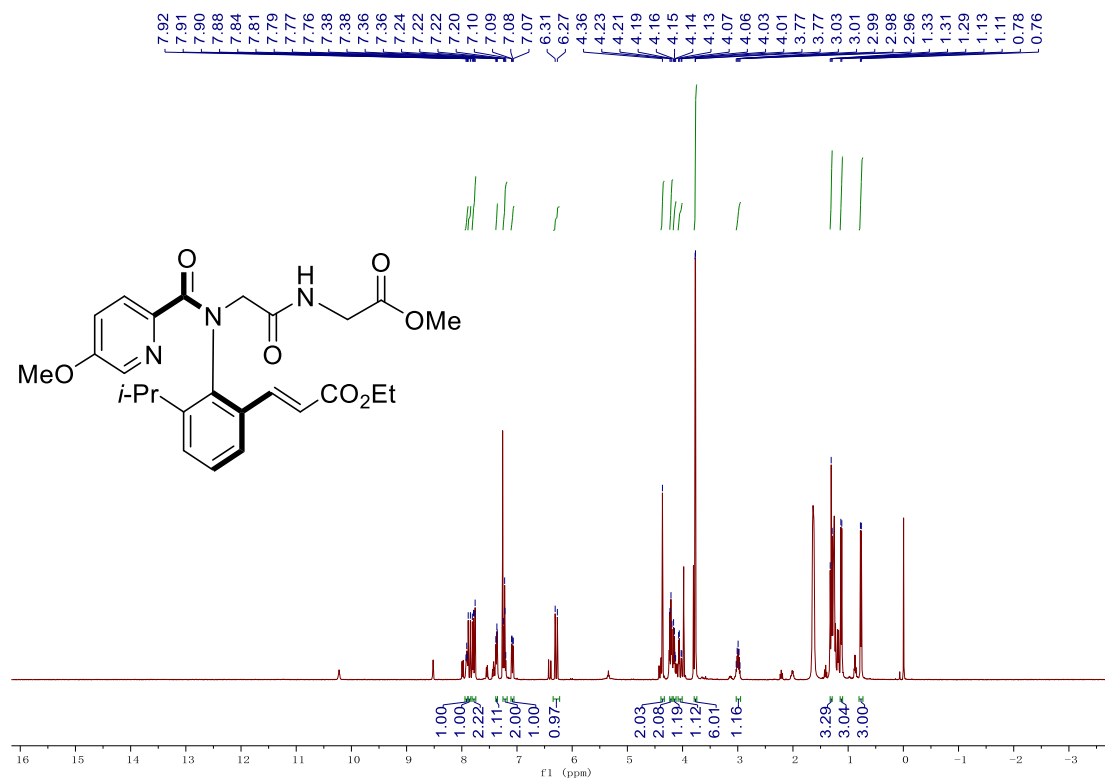

### 3d-<sup>13</sup>C NMR

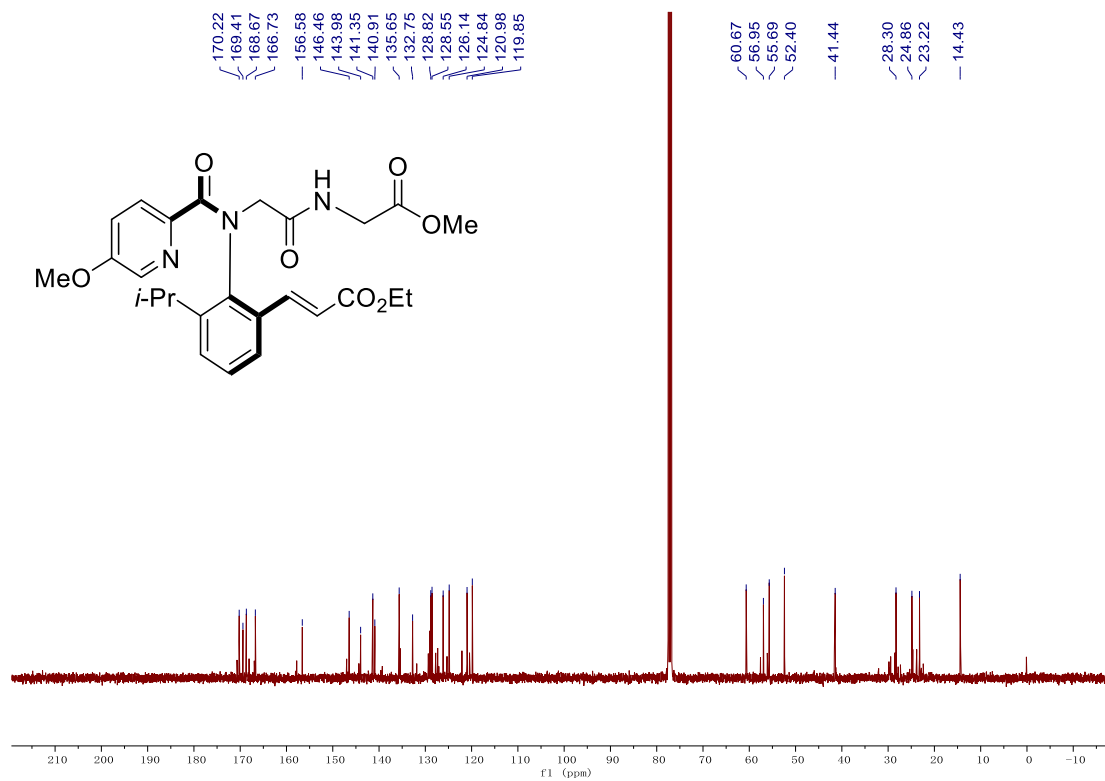

### 3e-<sup>1</sup>H NMR

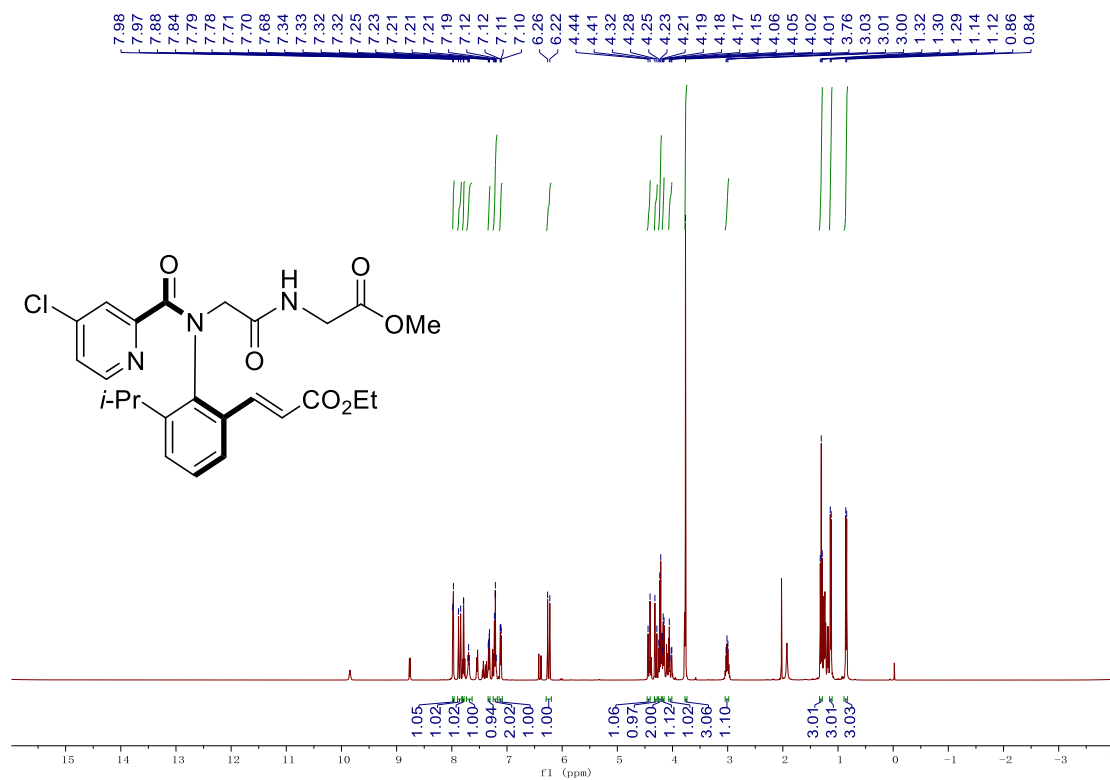

### 3e-<sup>13</sup>C NMR

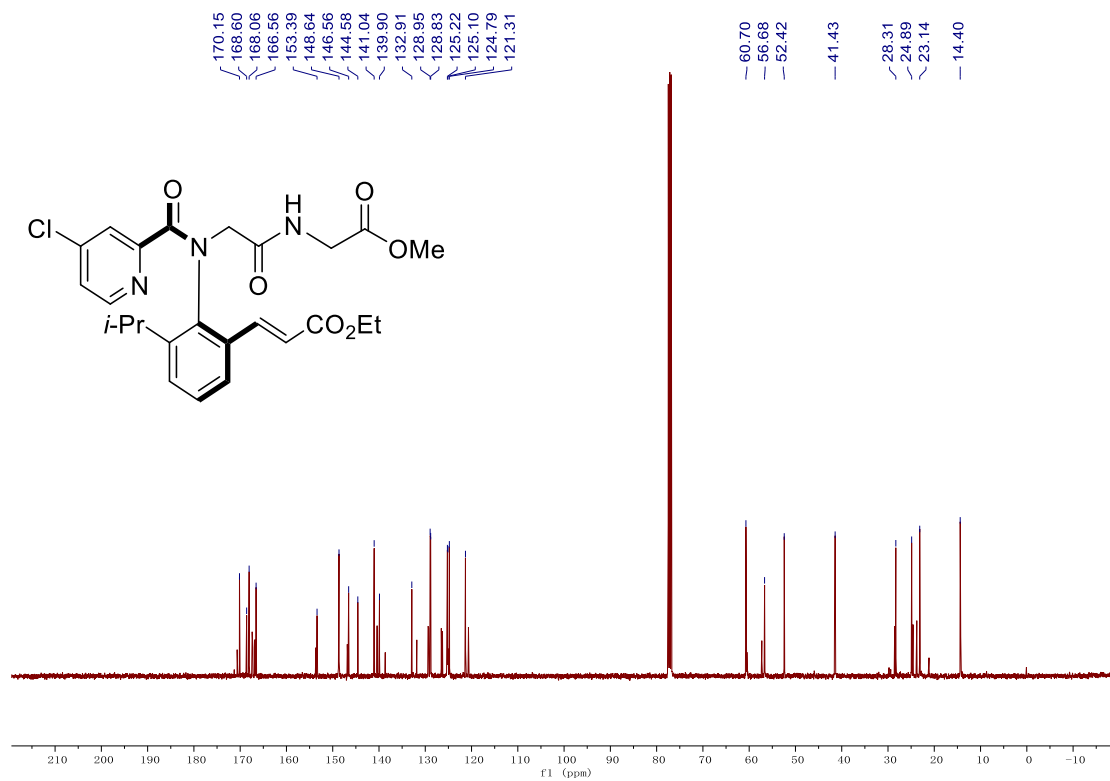

### 3f-<sup>1</sup>H NMR

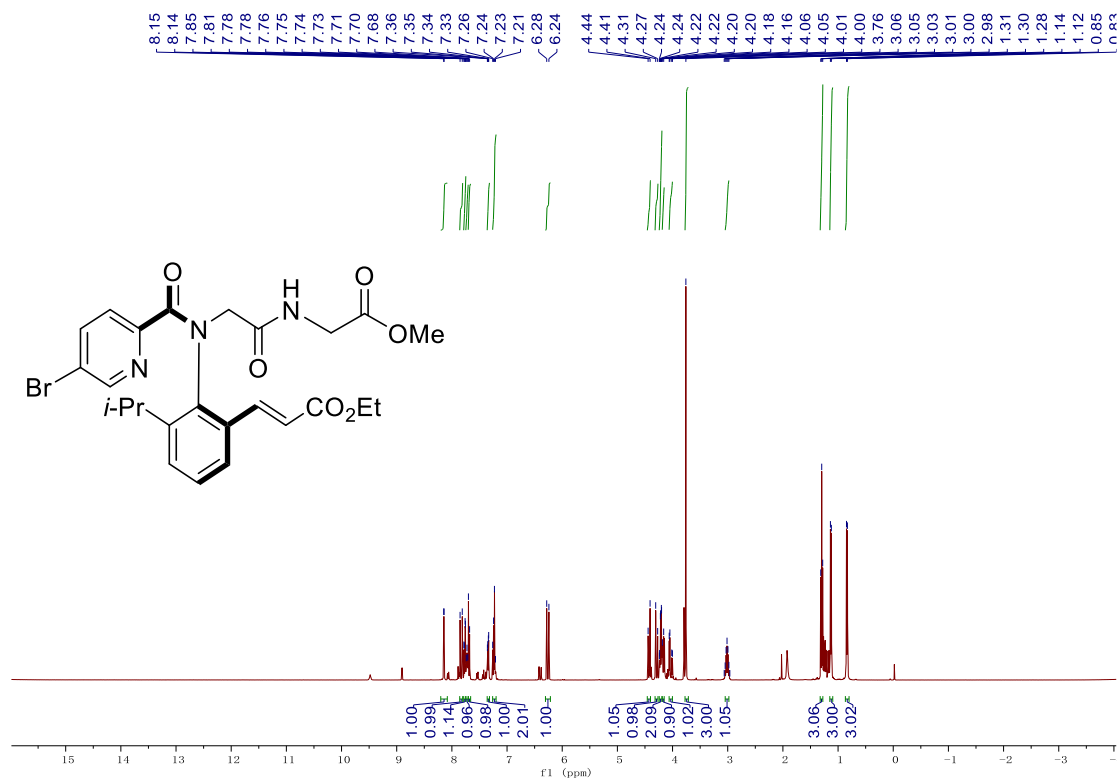

### 3f-<sup>13</sup>C NMR

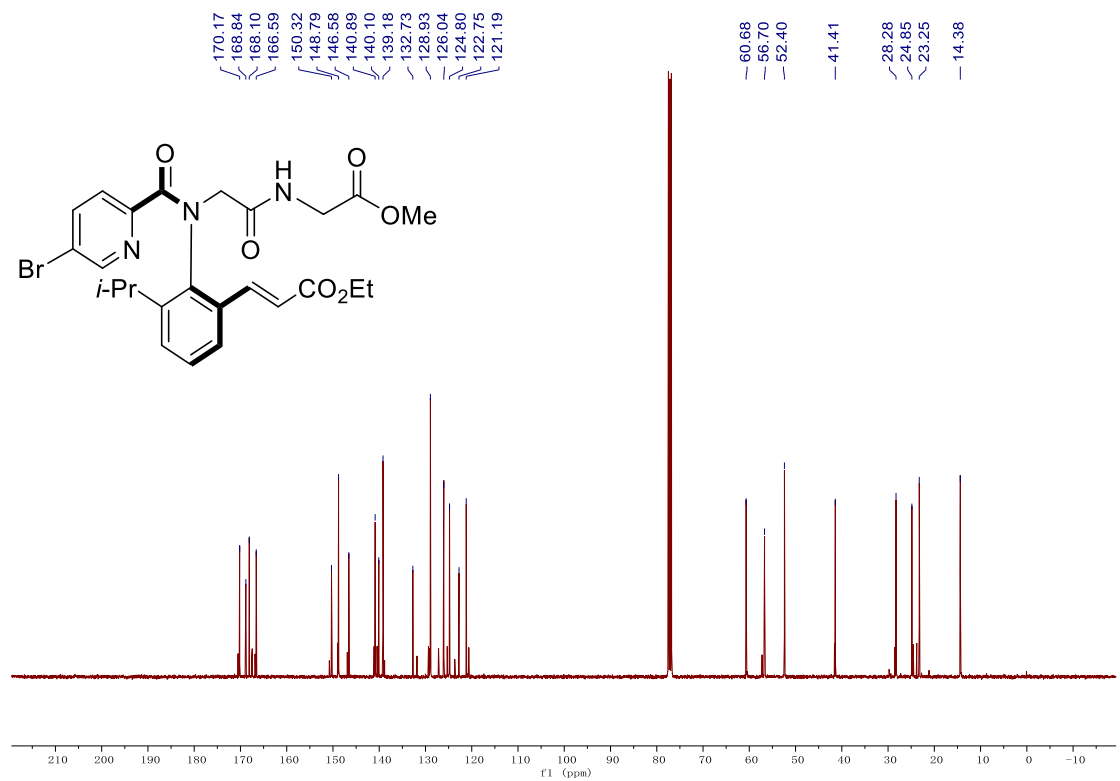

### 3g-<sup>1</sup>H NMR

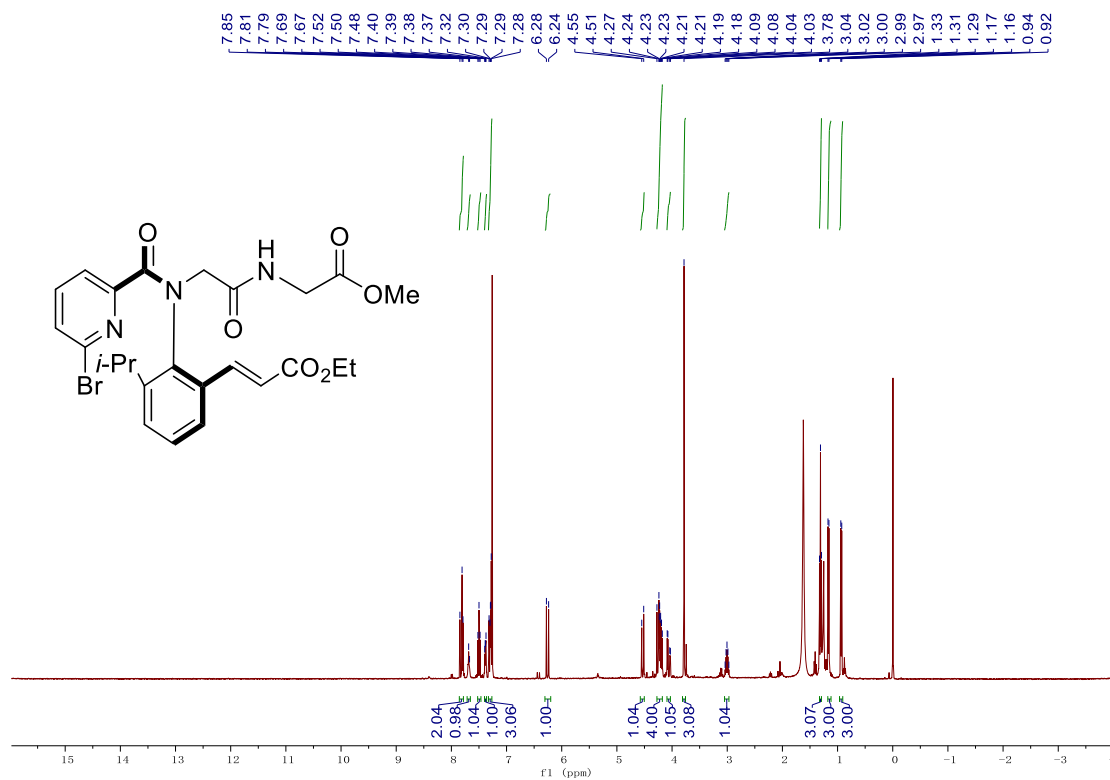

### 3g-<sup>13</sup>C NMR

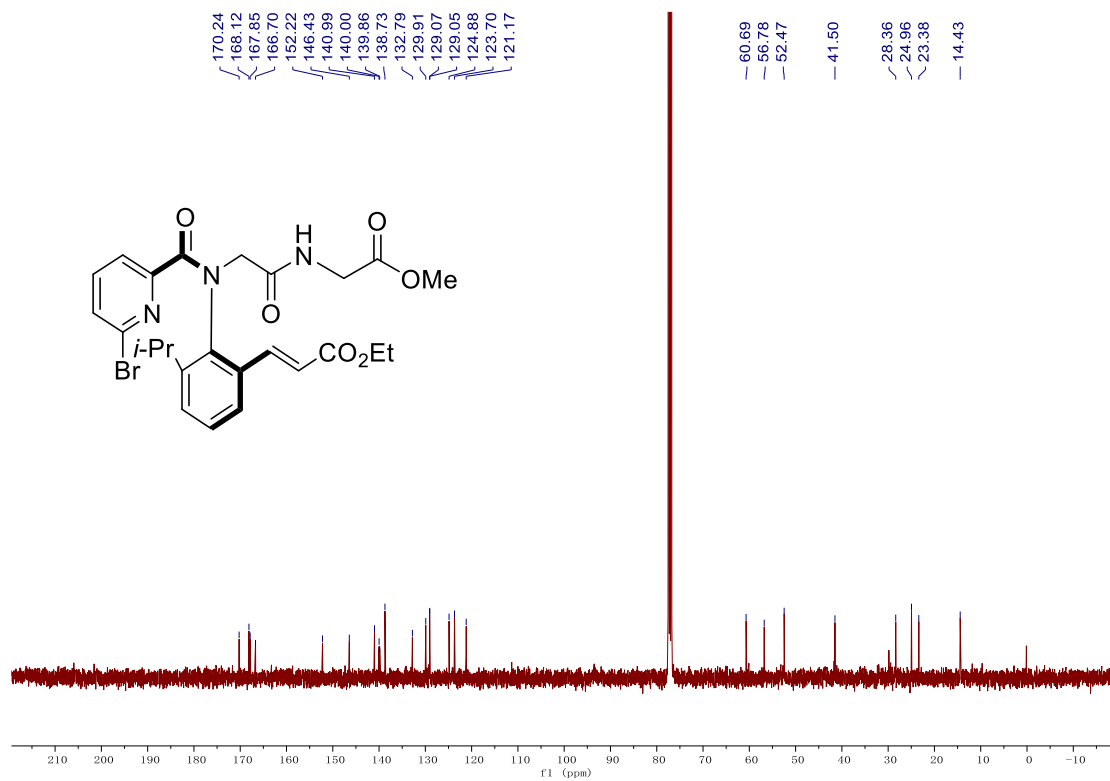



### 3h-<sup>1</sup>H NMR

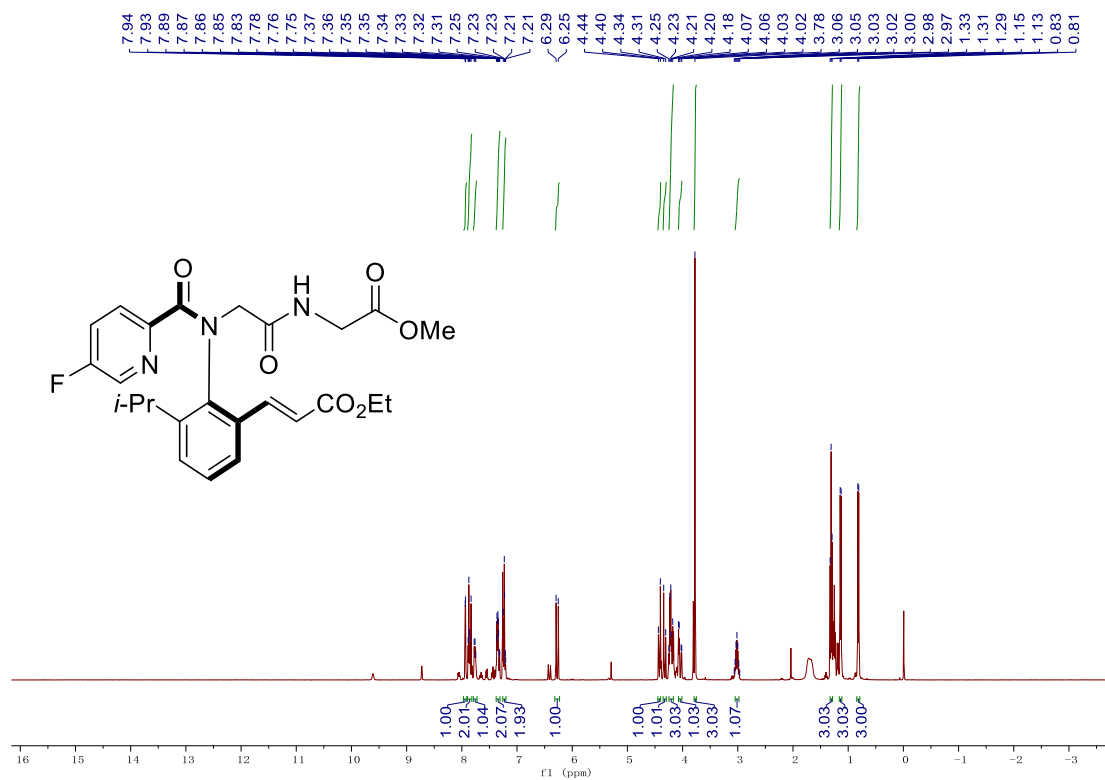

### 3h-<sup>13</sup>C NMR

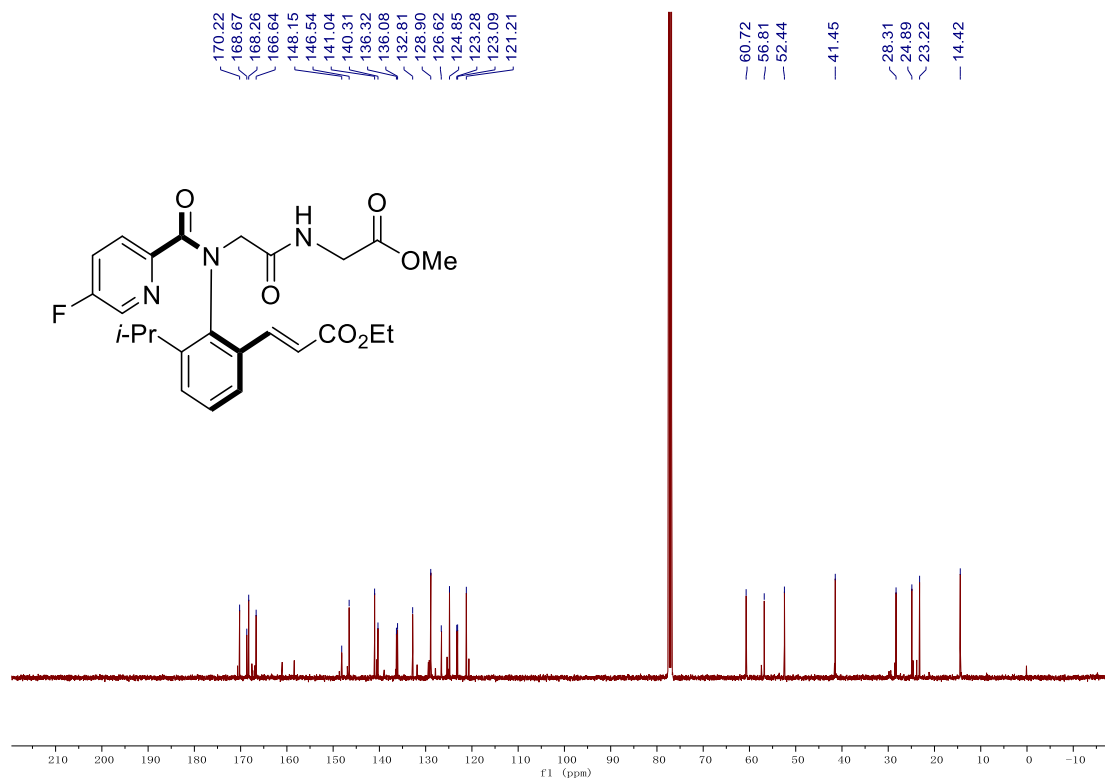

3h-<sup>19</sup>F

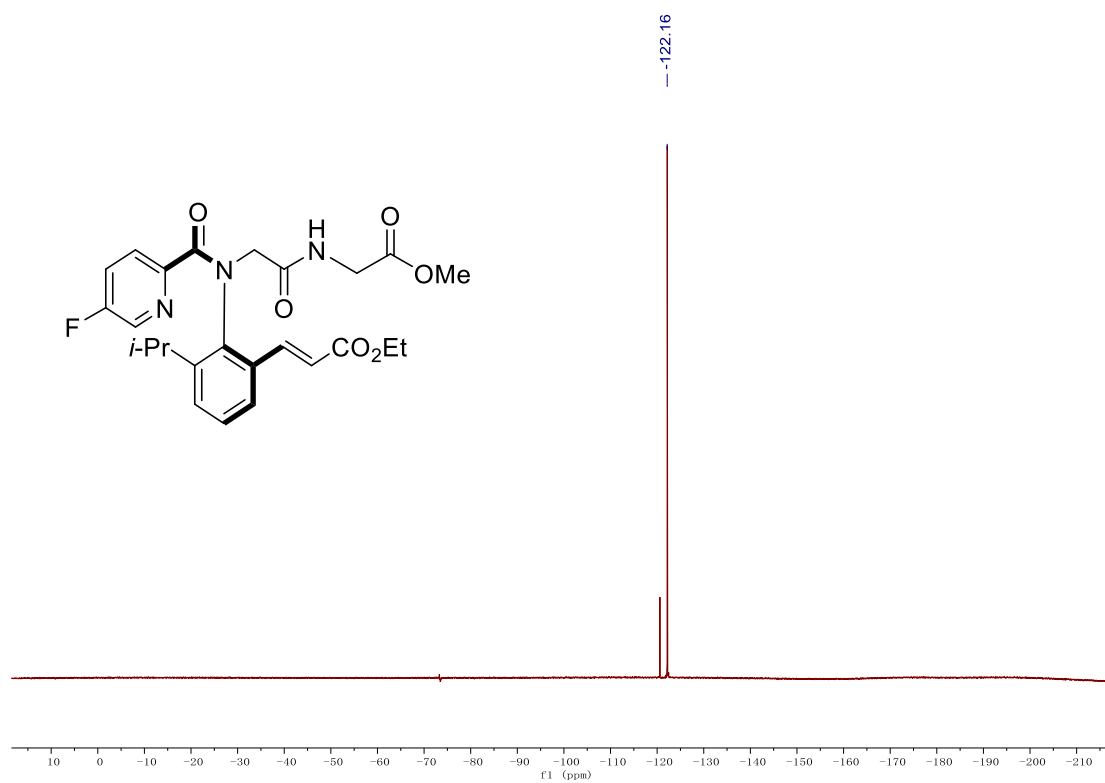

### 3i-<sup>1</sup>H NMR

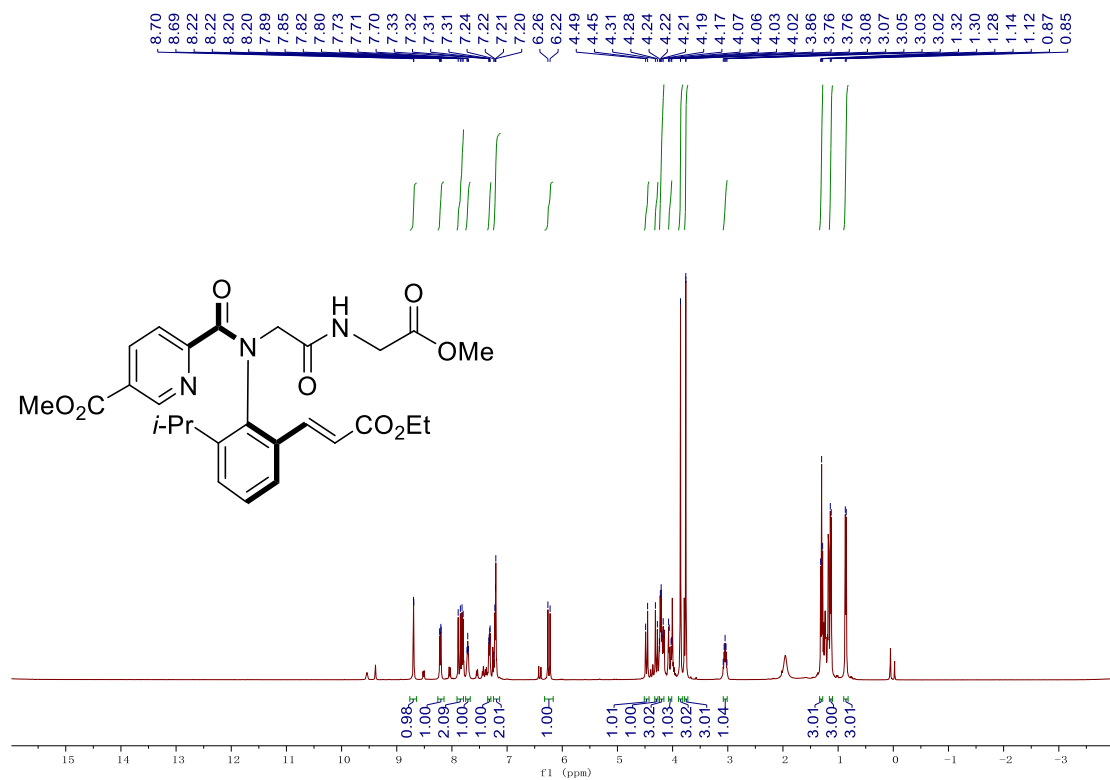

### 3i-<sup>13</sup>C NMR

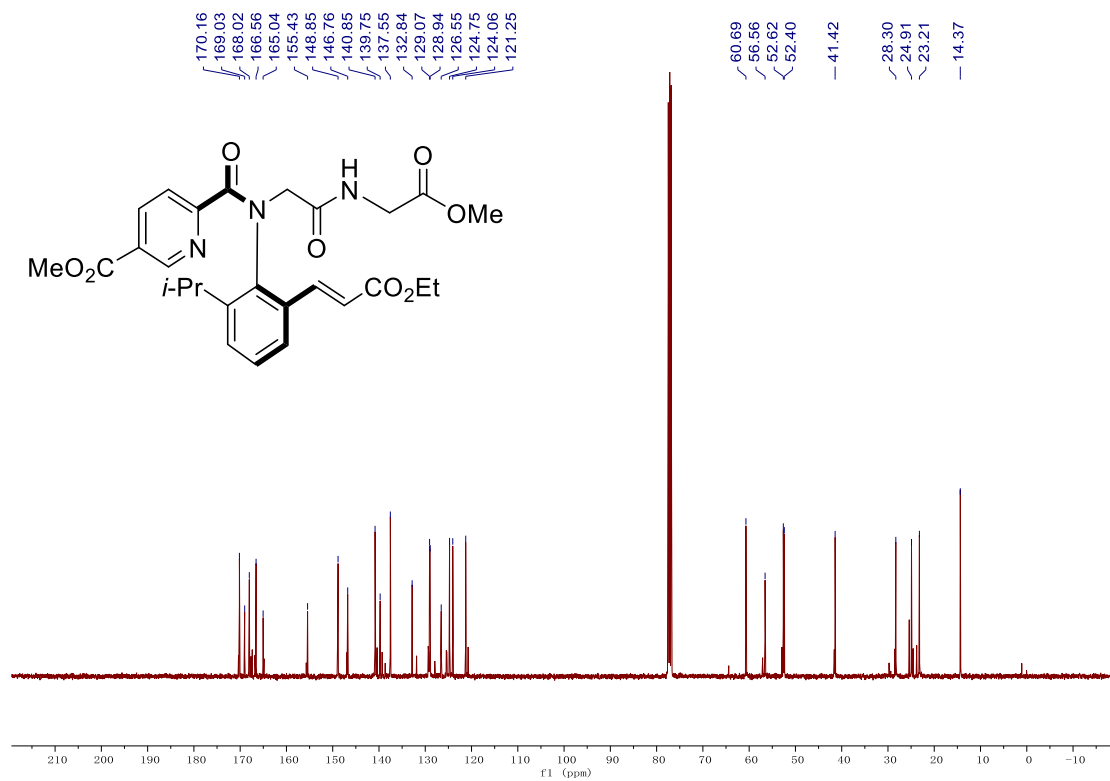

### 3j-<sup>1</sup>H NMR

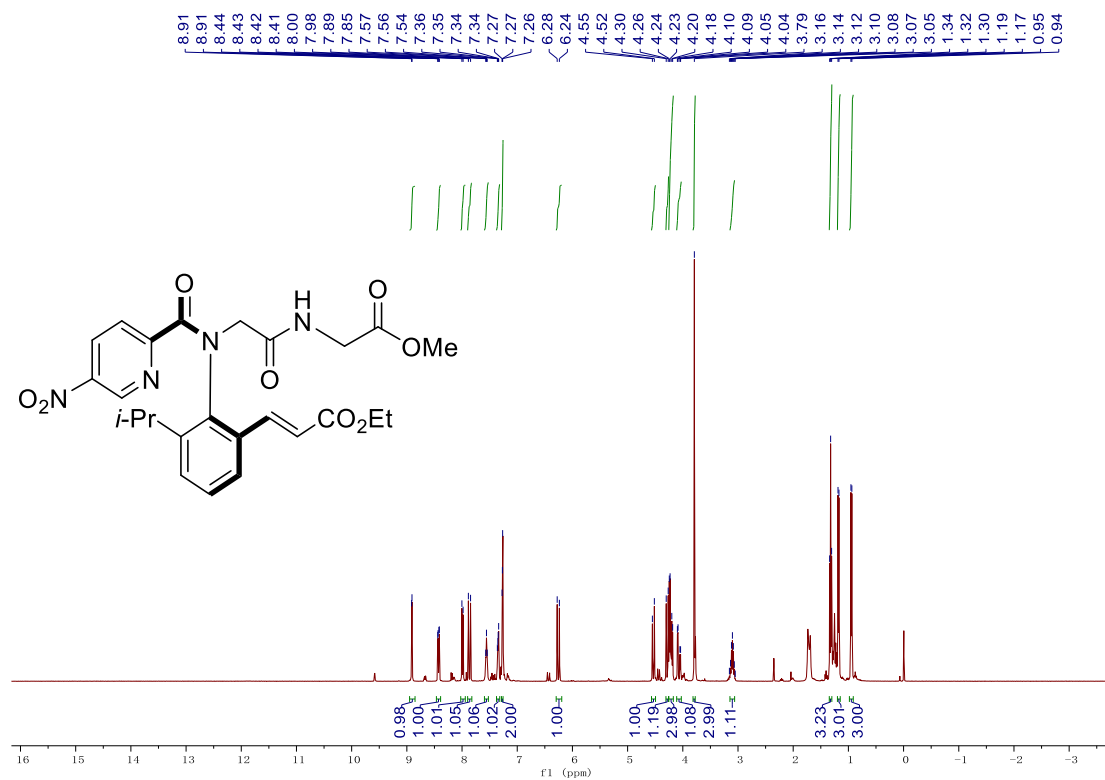

### 3j-<sup>13</sup>C NMR

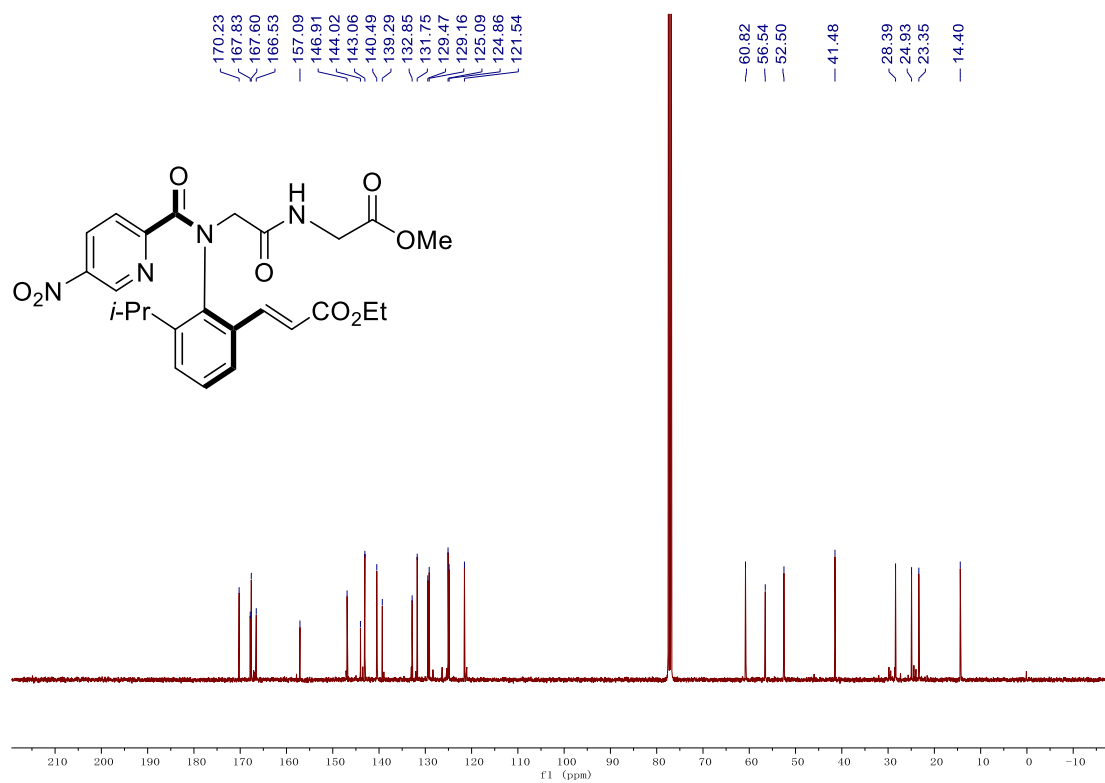

### 3k-<sup>1</sup>H NMR

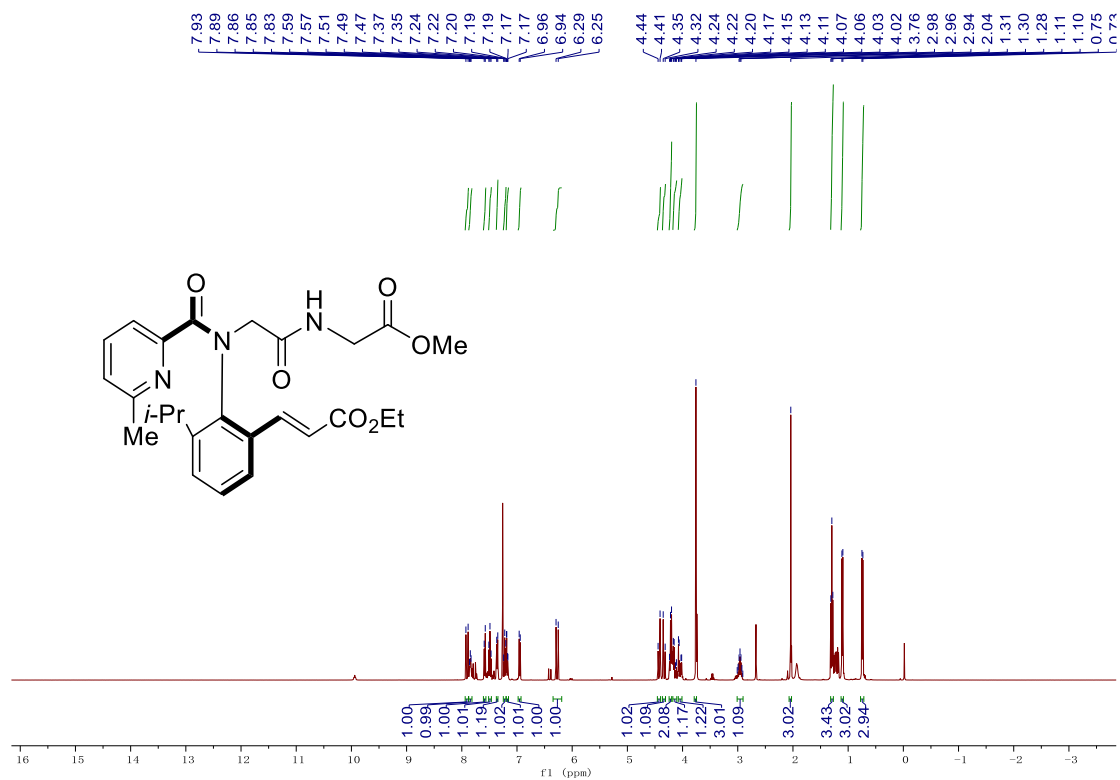

### 3k-<sup>13</sup>C NMR

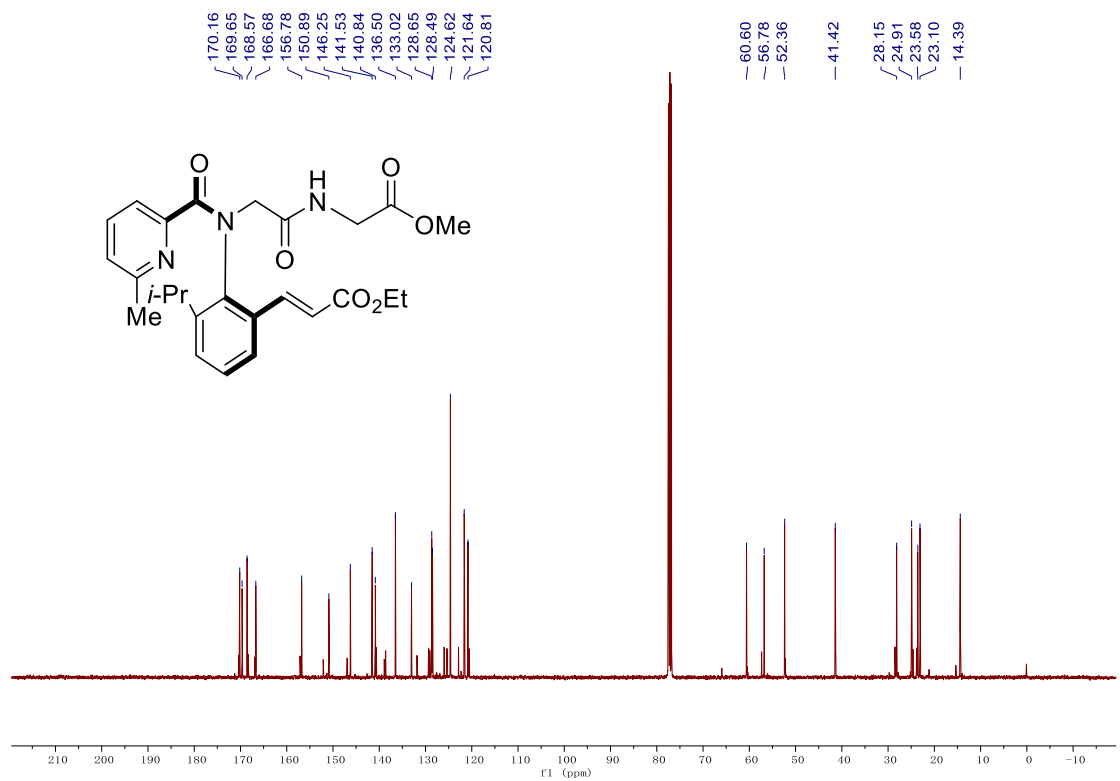

### 30-<sup>1</sup>H NMR

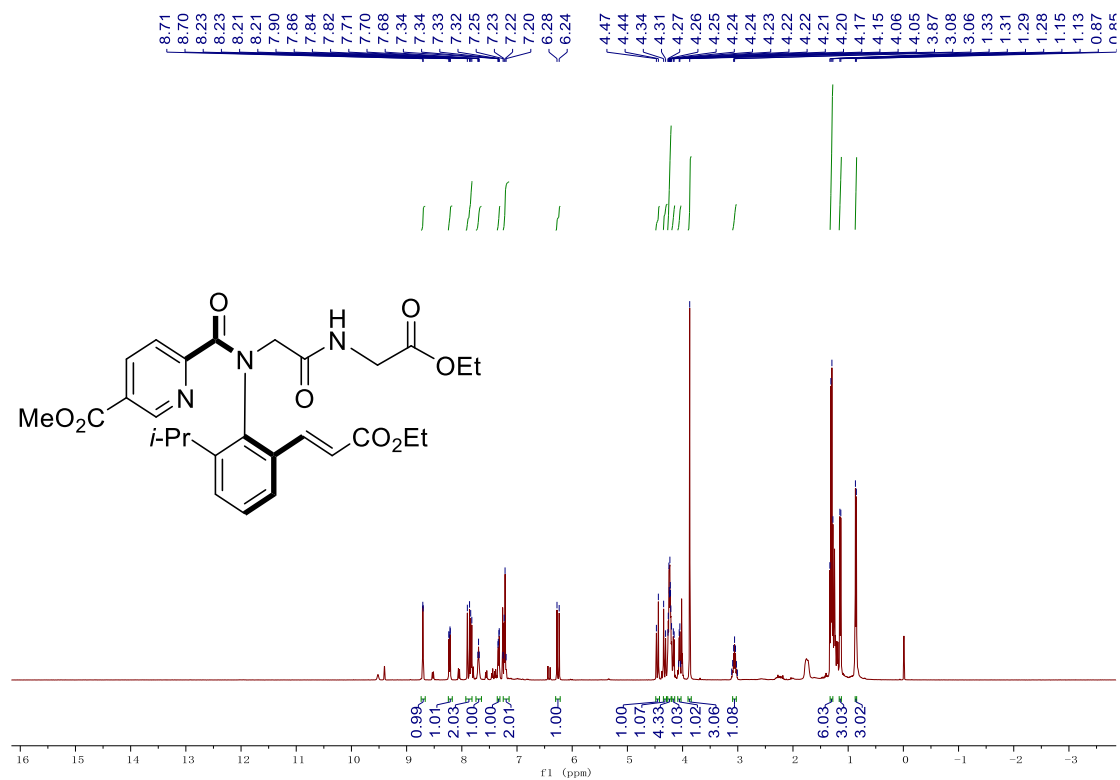

### 30-<sup>13</sup>C NMR

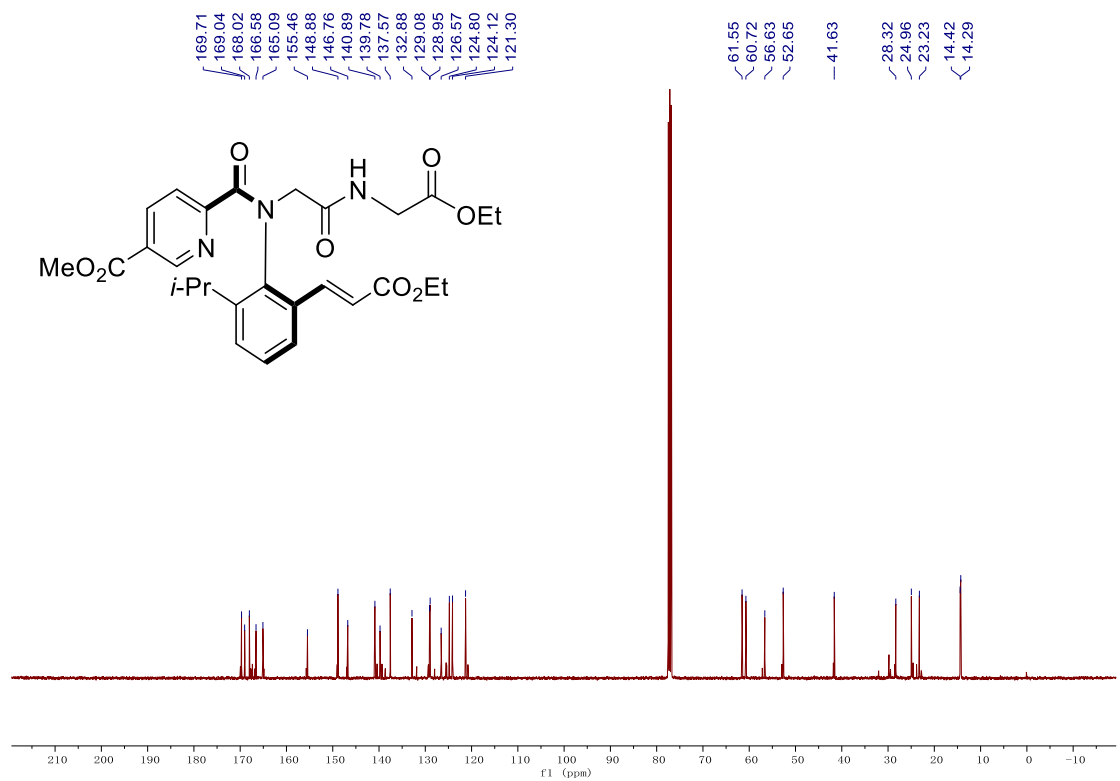

### 3p-<sup>1</sup>H NMR

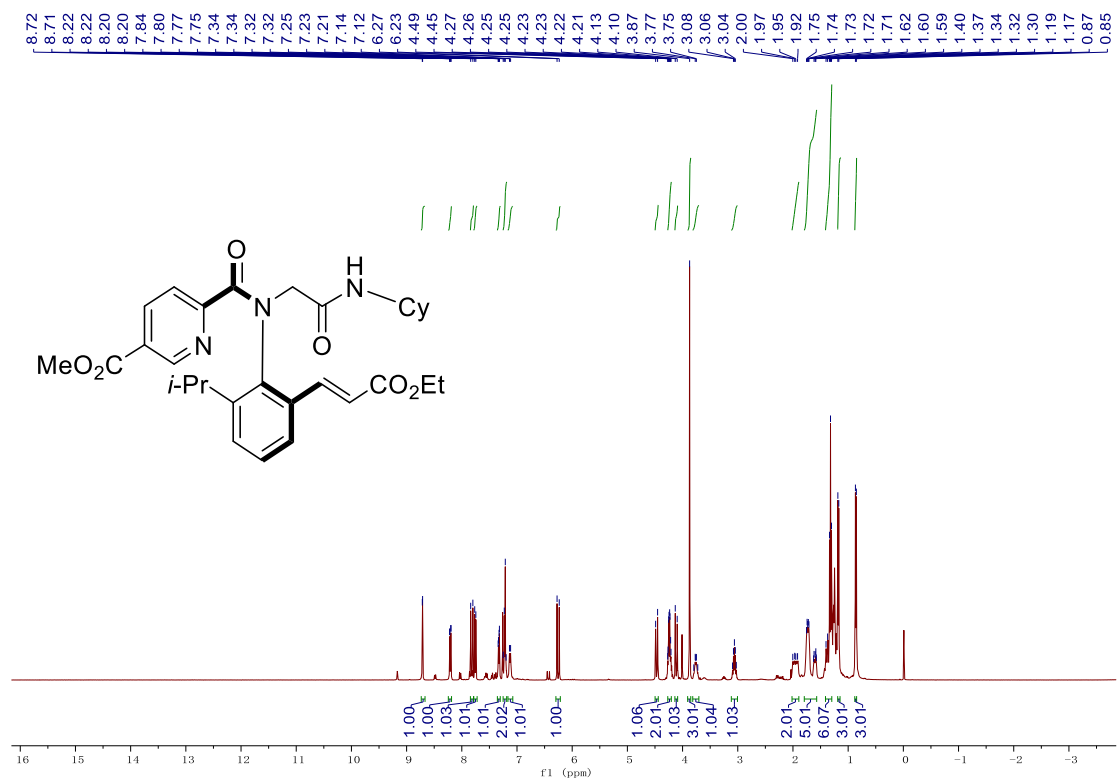

### 3p-<sup>13</sup>C NMR

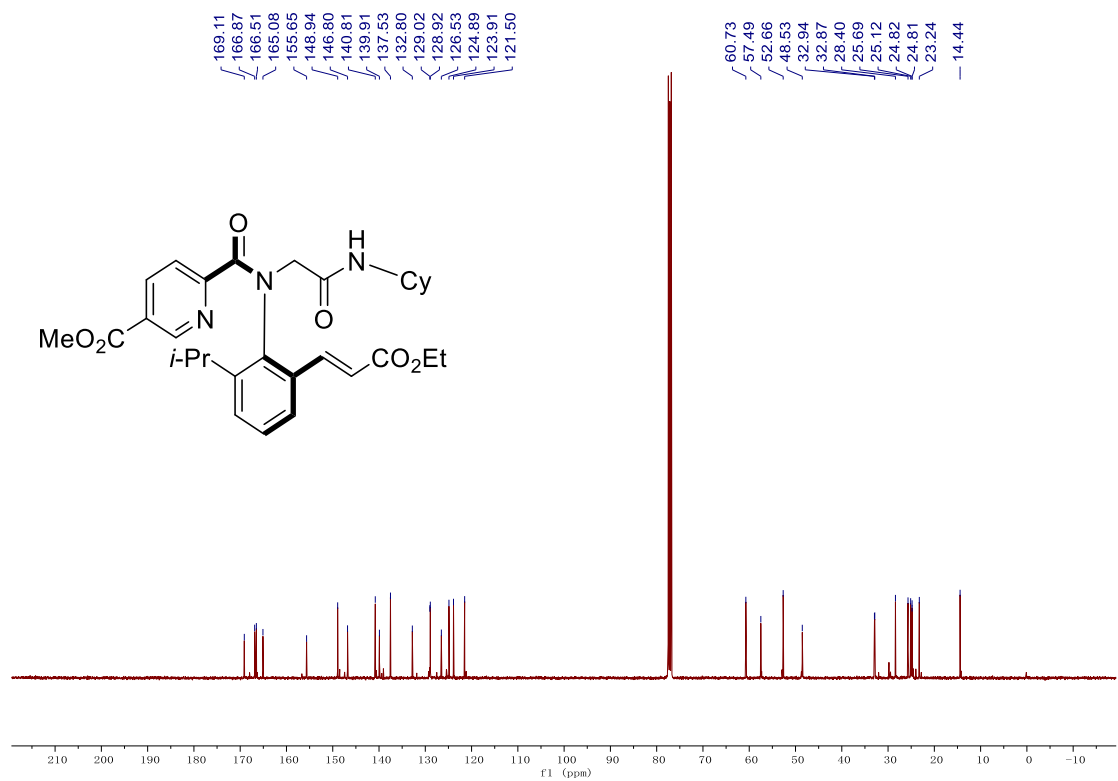

### 3q-<sup>1</sup>H NMR

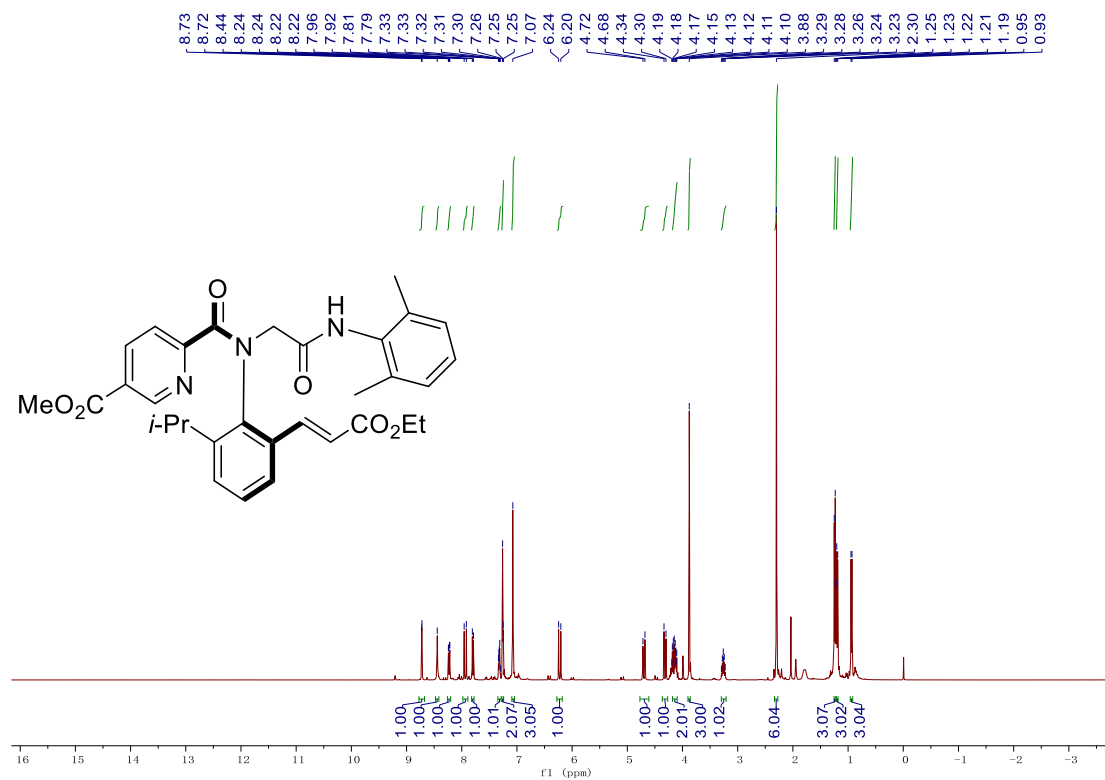

### 3q-<sup>13</sup>C NMR

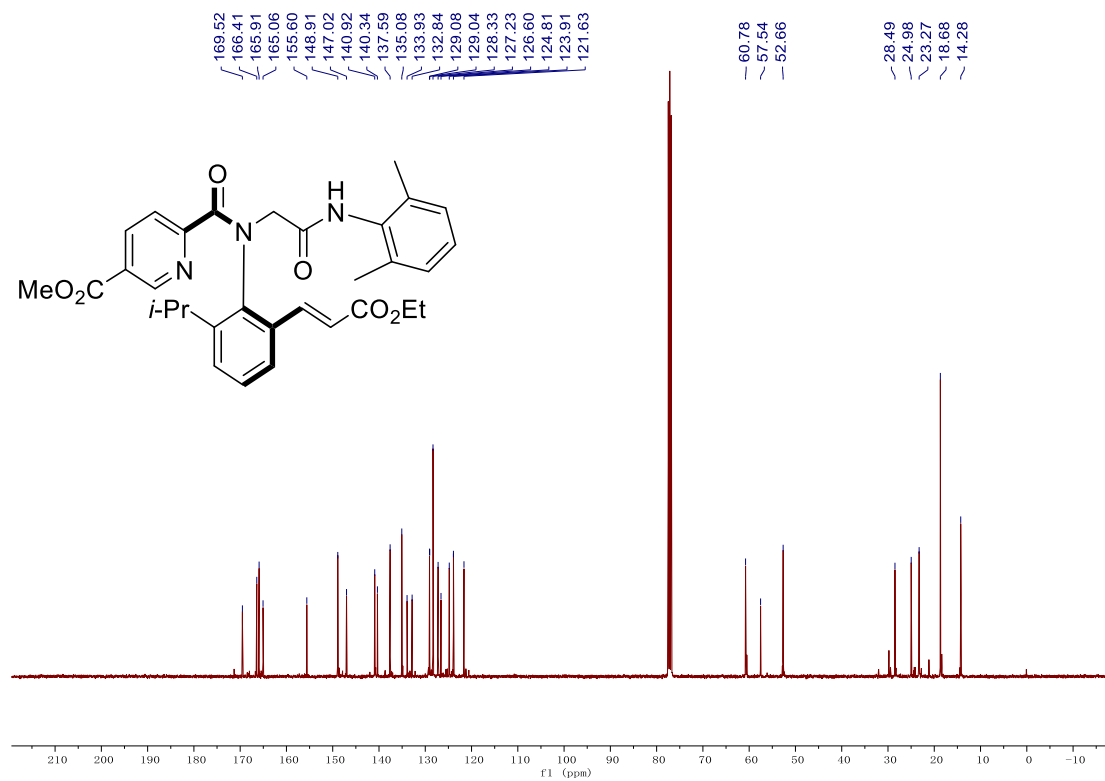



### 3r-<sup>1</sup>H NMR

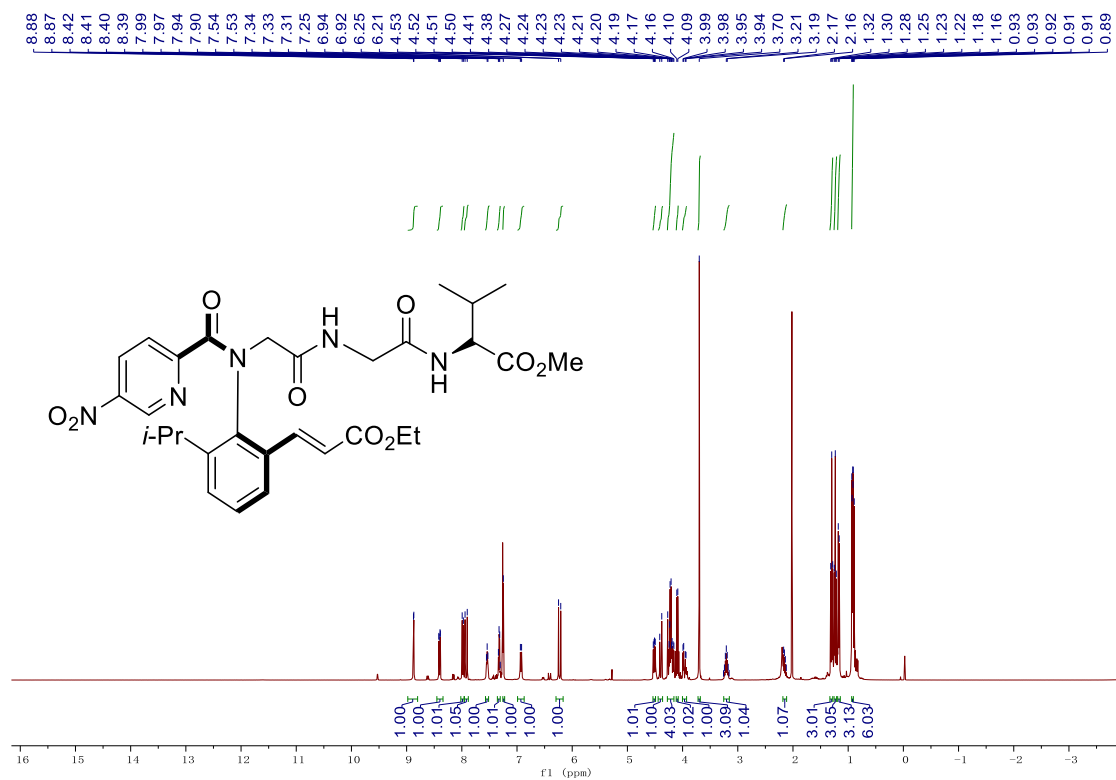

### 3r-<sup>13</sup>C NMR

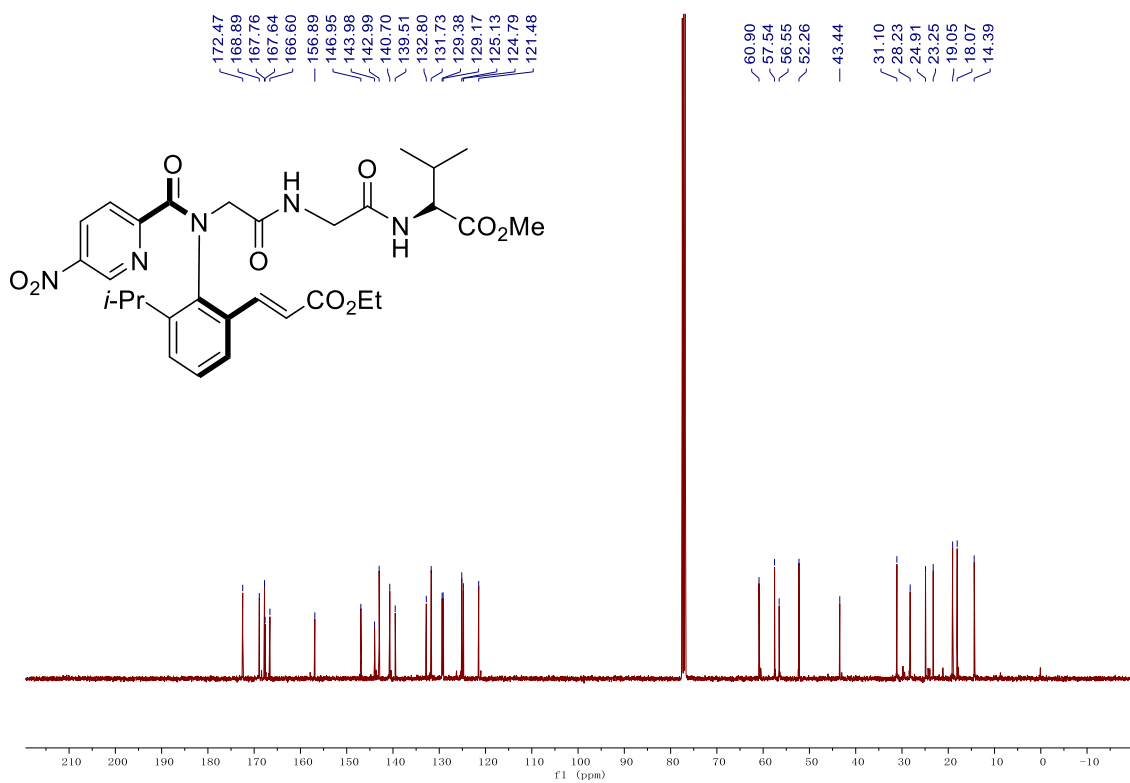

### 3s-<sup>1</sup>H NMR

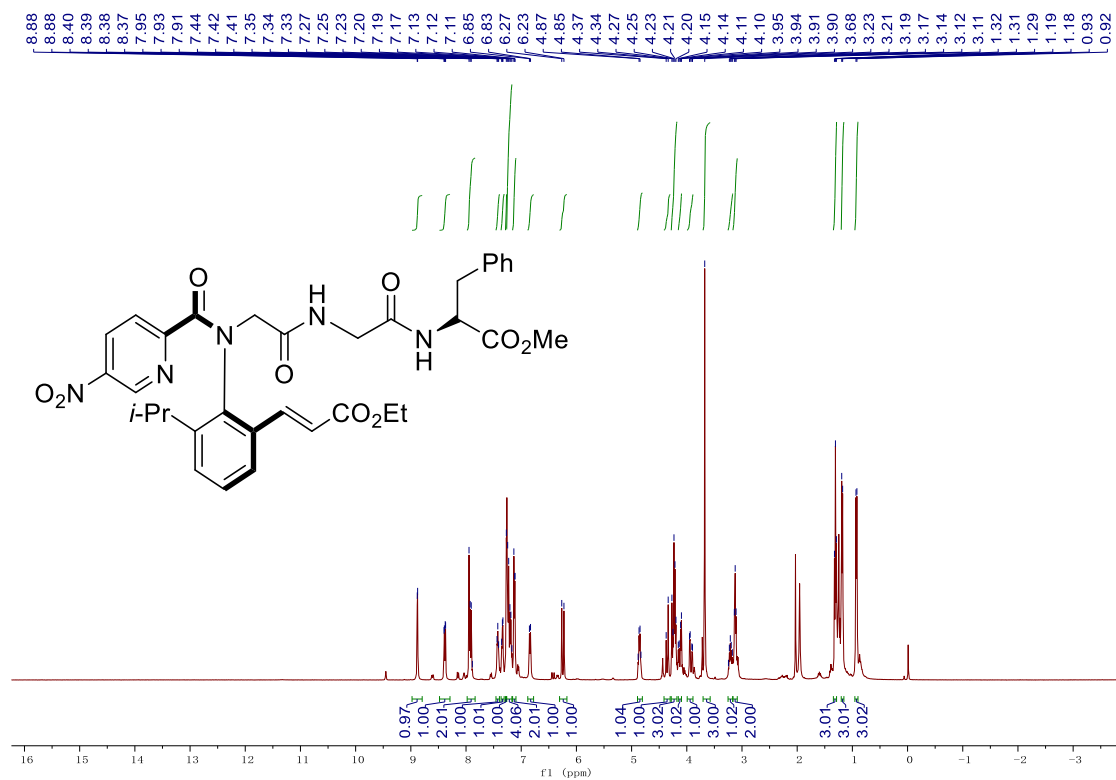

### 3s-<sup>13</sup>C NMR

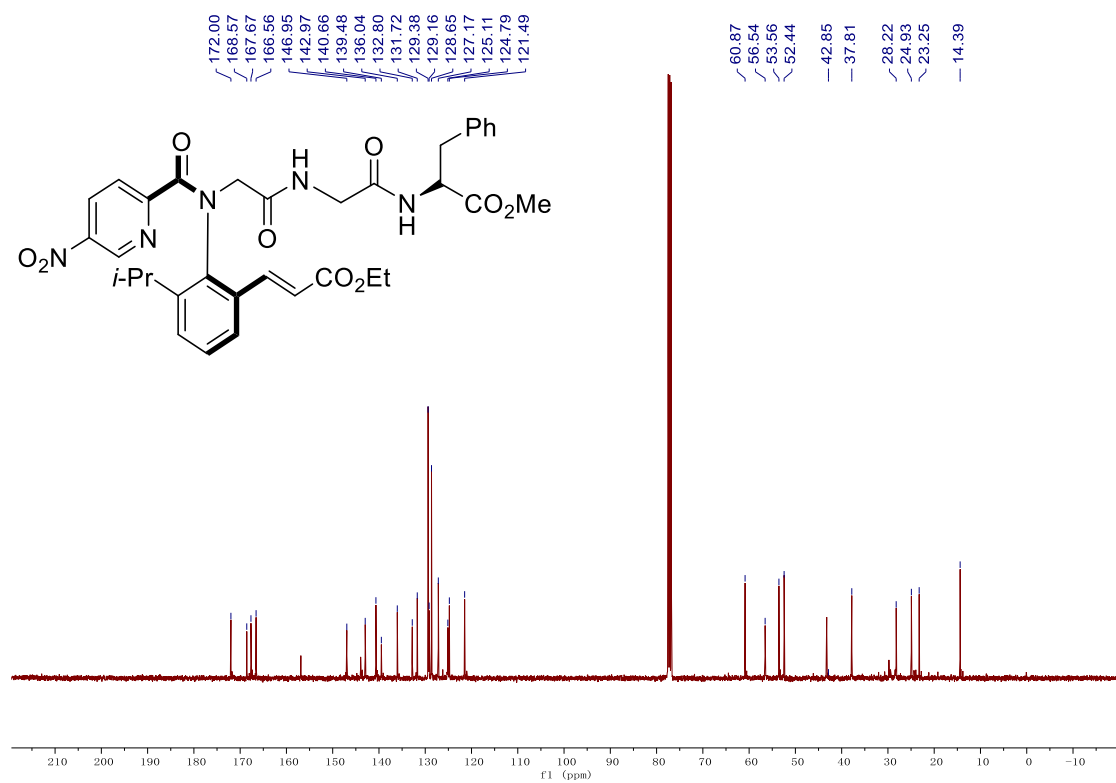

### 3t-<sup>1</sup>H NMR

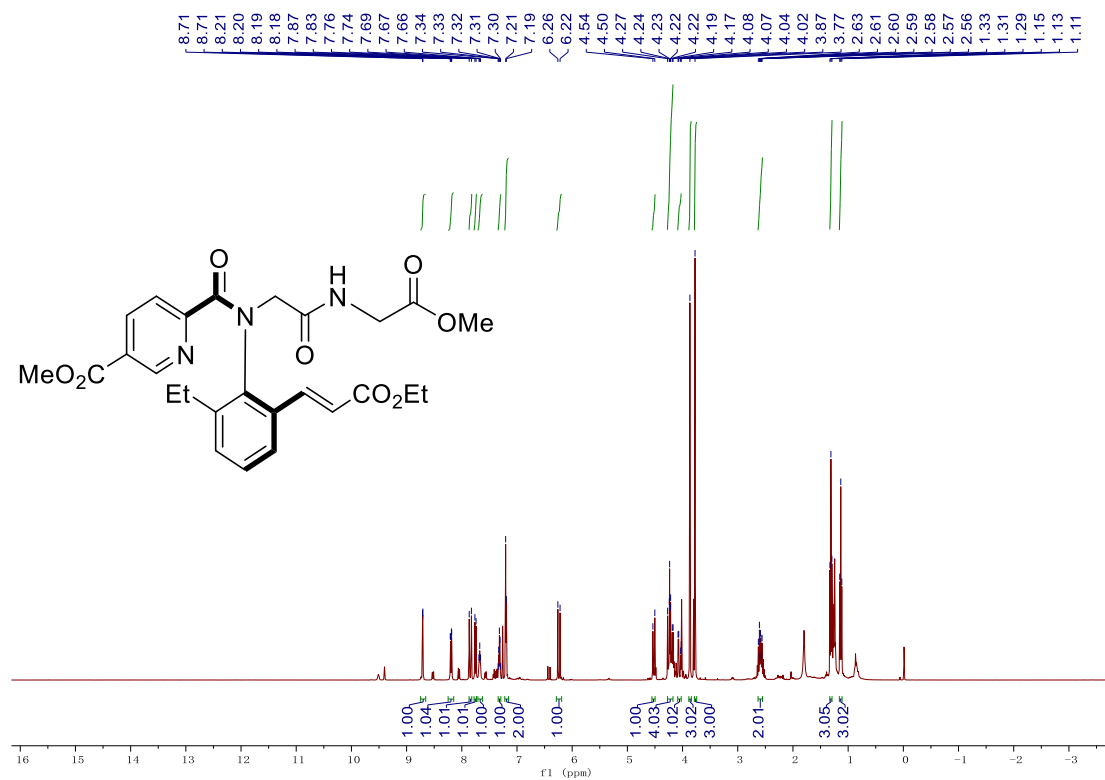

### 3t-<sup>13</sup>C NMR

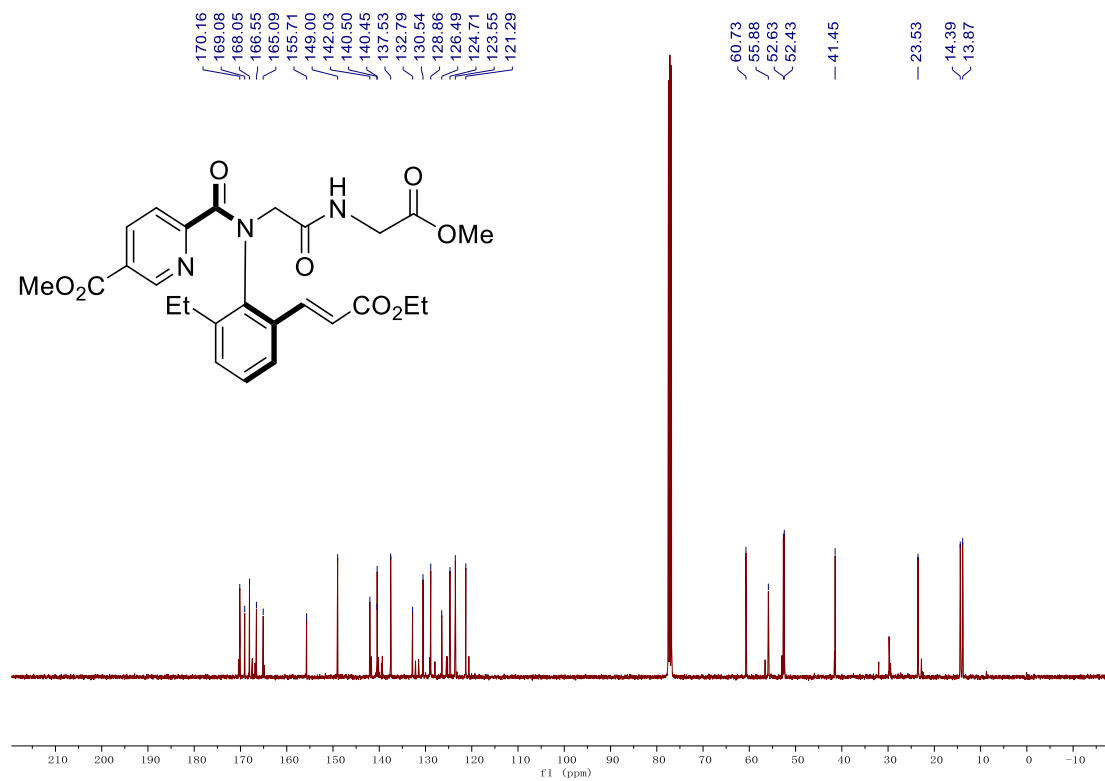

### 3u-<sup>1</sup>H NMR

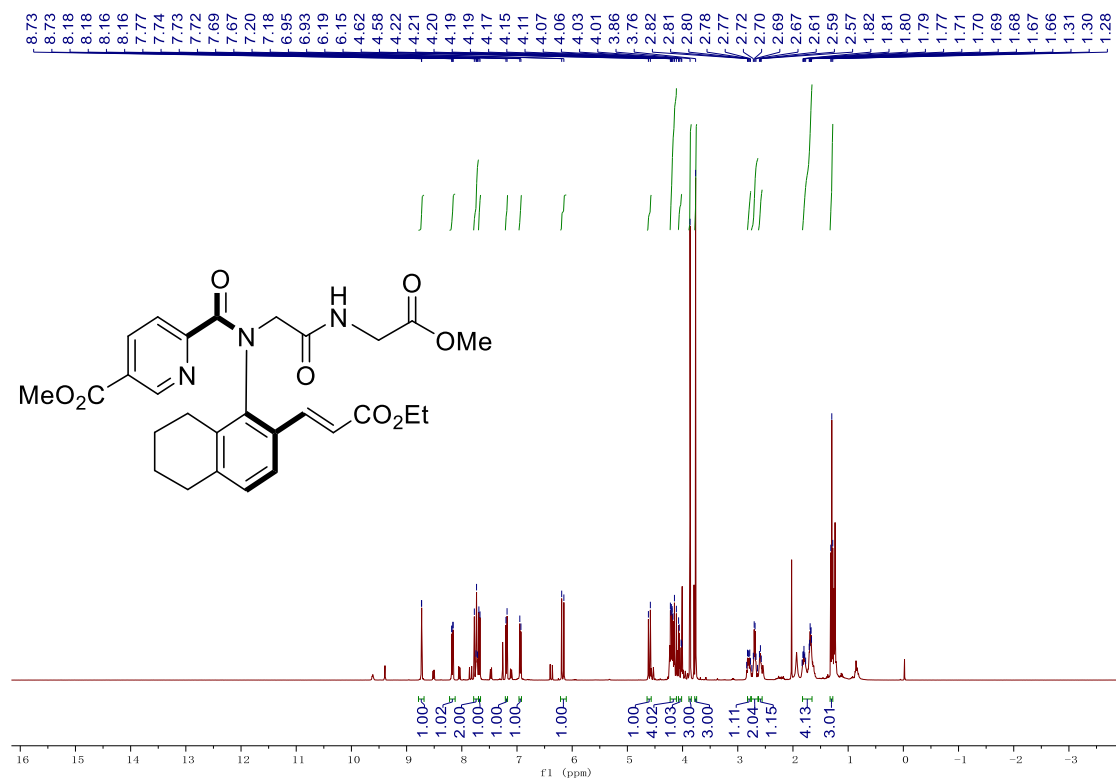

### 3u-<sup>13</sup>C NMR

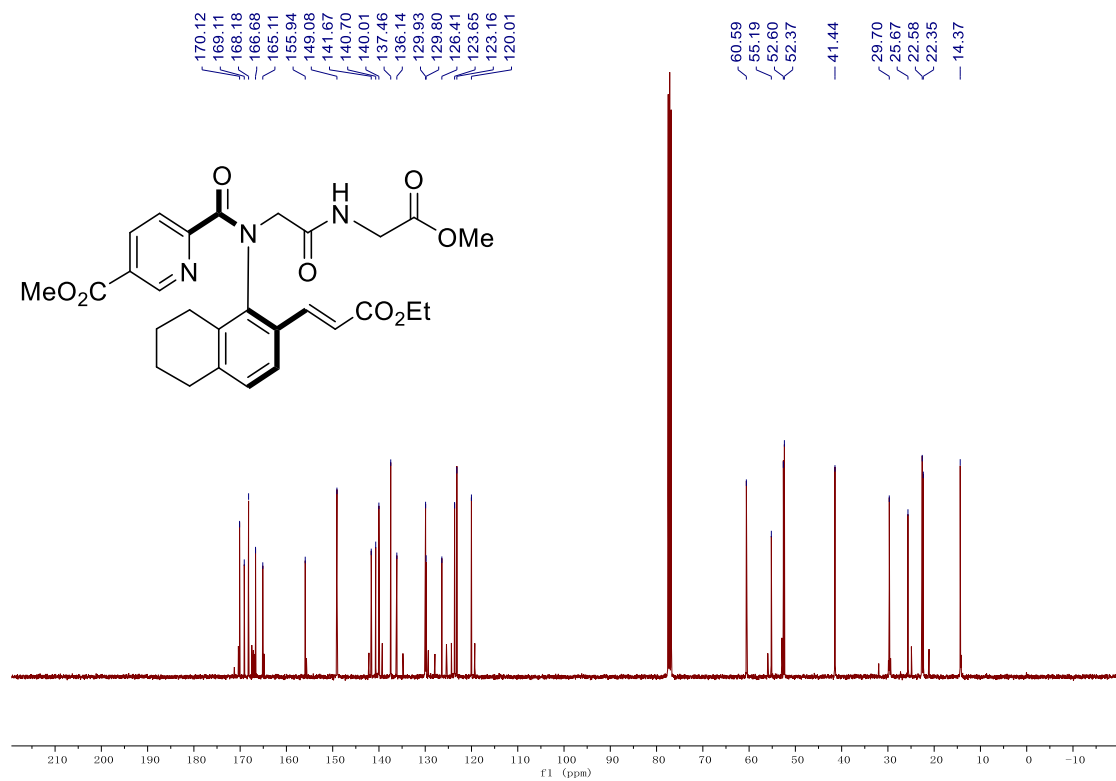

### 3v-<sup>1</sup>H NMR

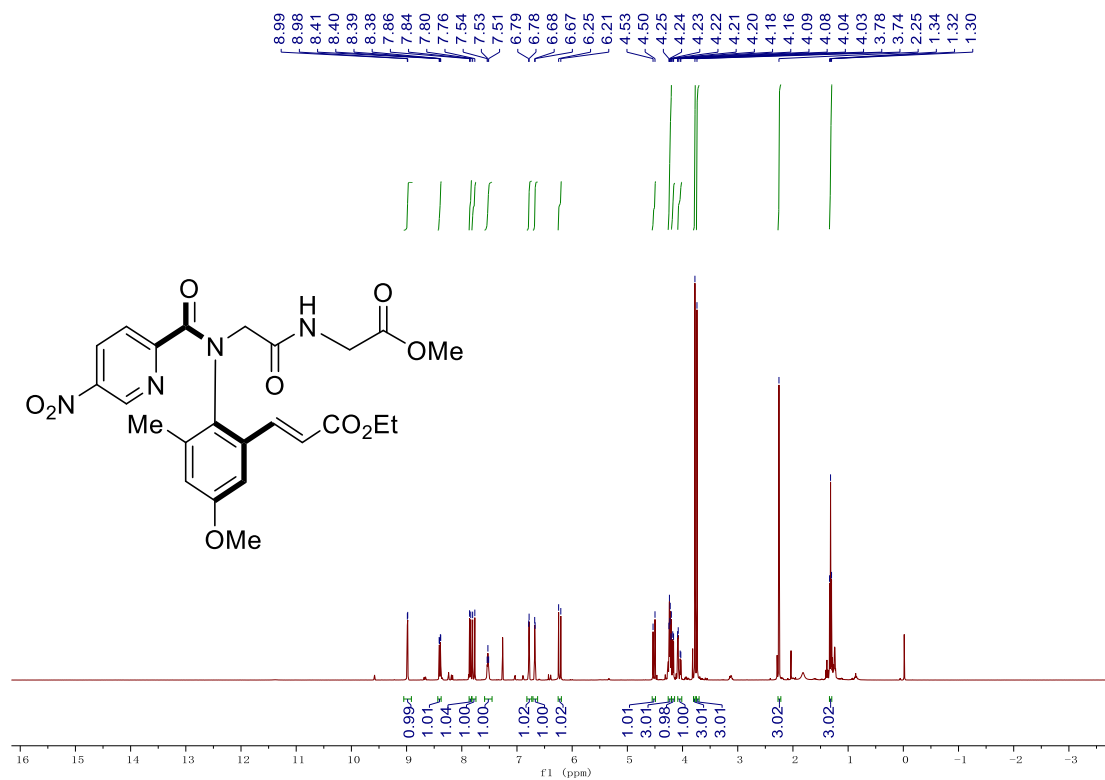

### 3v-<sup>13</sup>C NMR

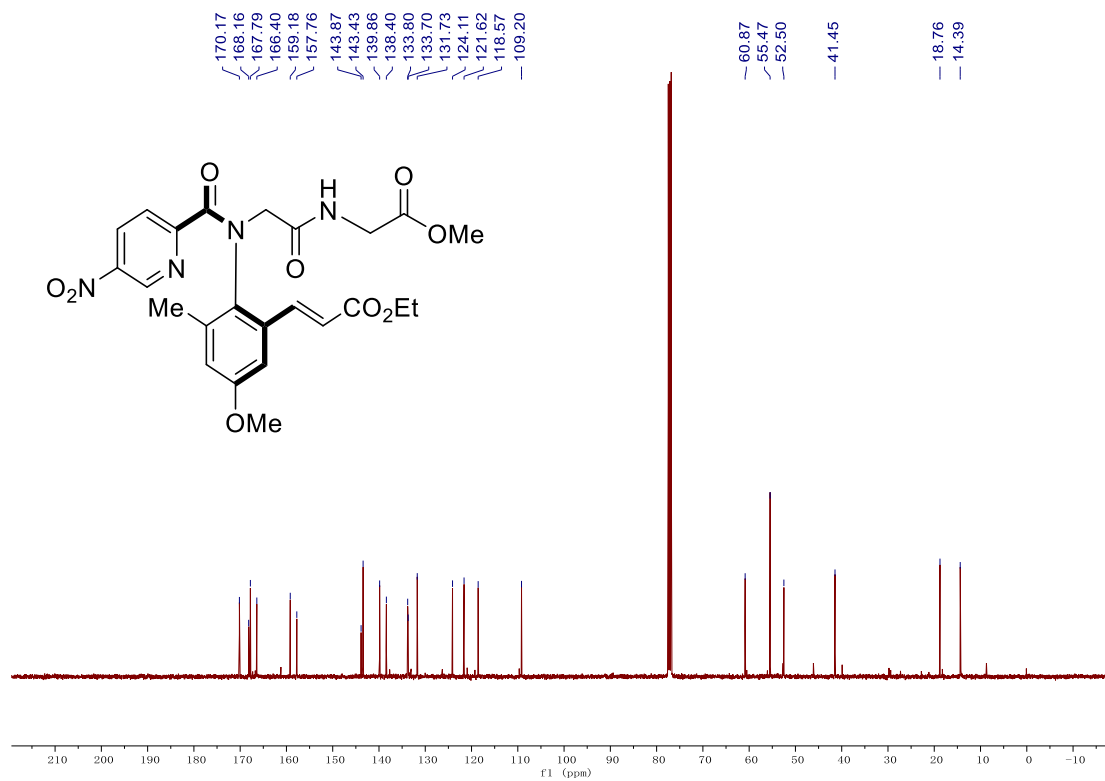

### 4b-<sup>1</sup>H NMR

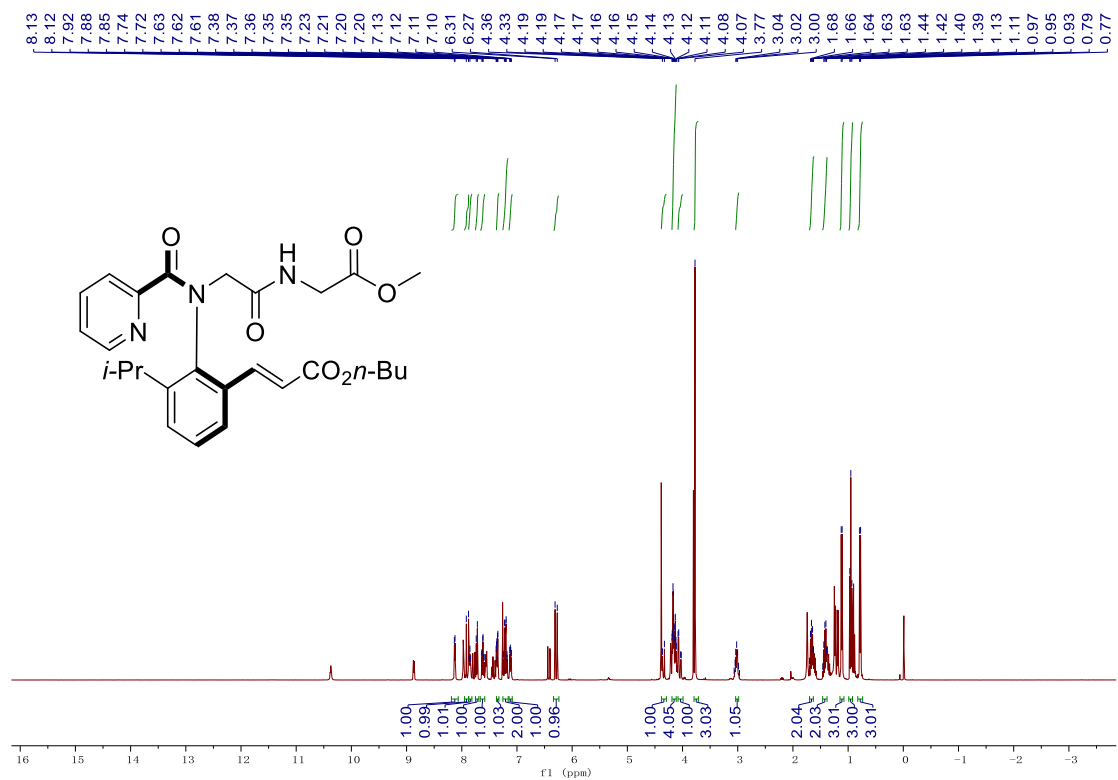

### 4b-<sup>13</sup>C NMR

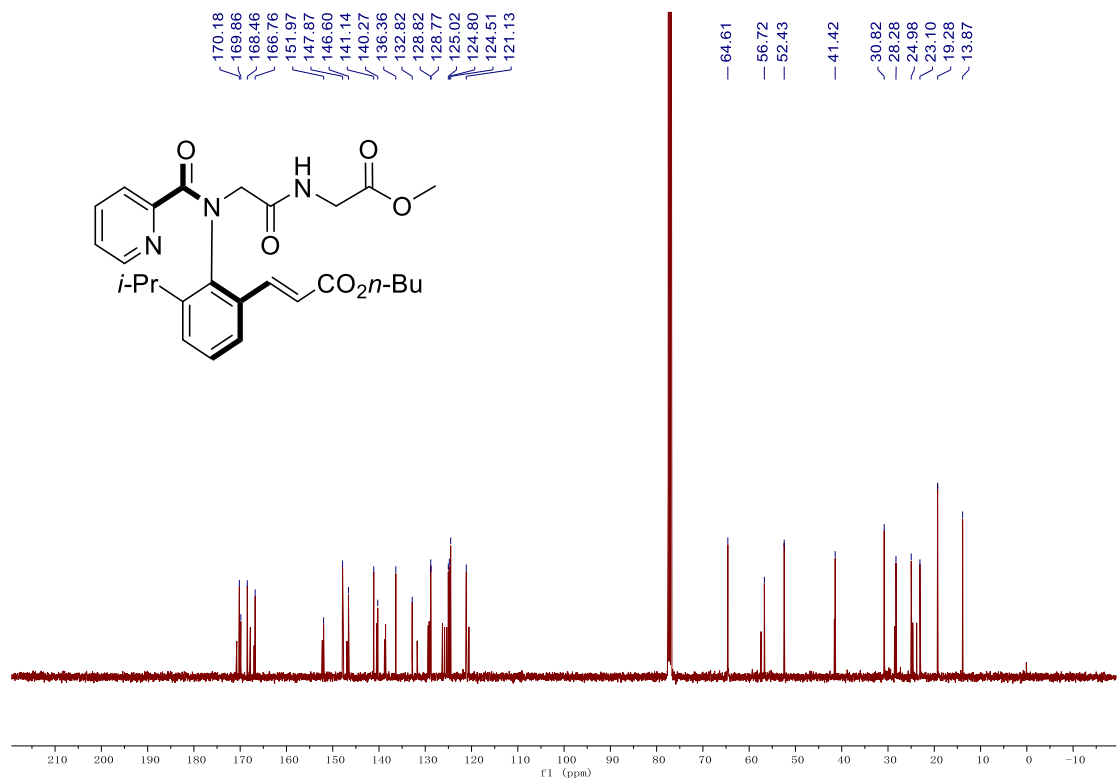

### 4c-<sup>1</sup>H NMR

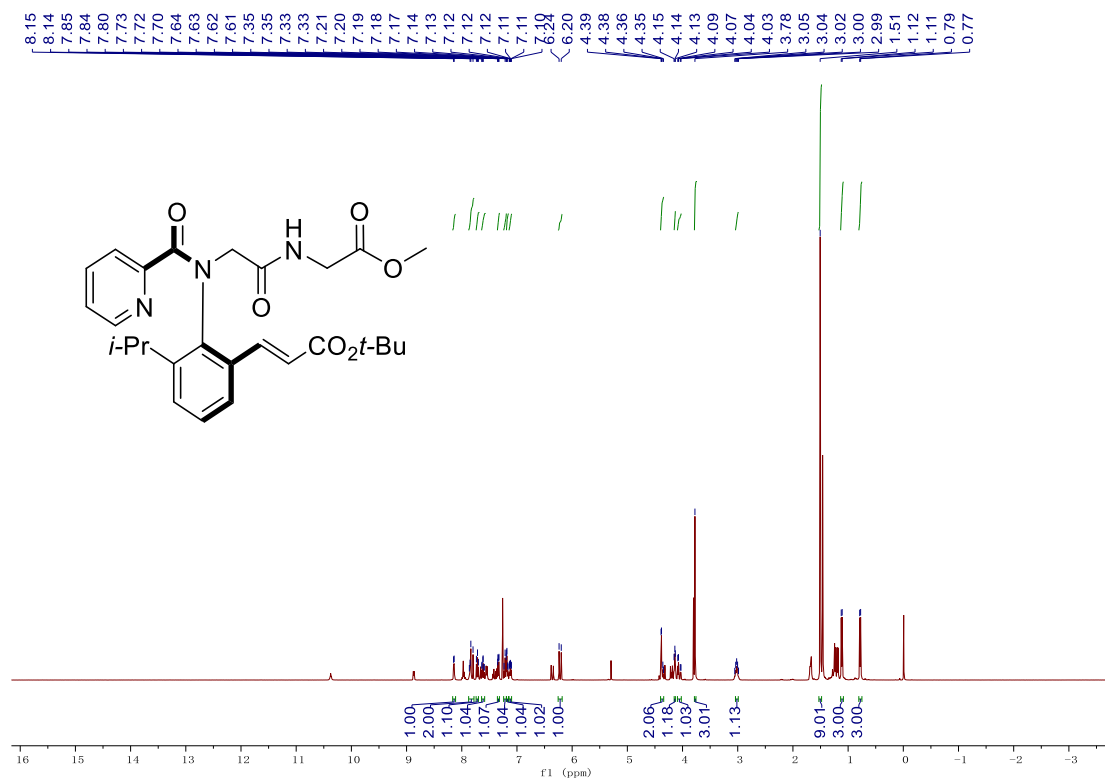

### 4c-<sup>13</sup>C NMR

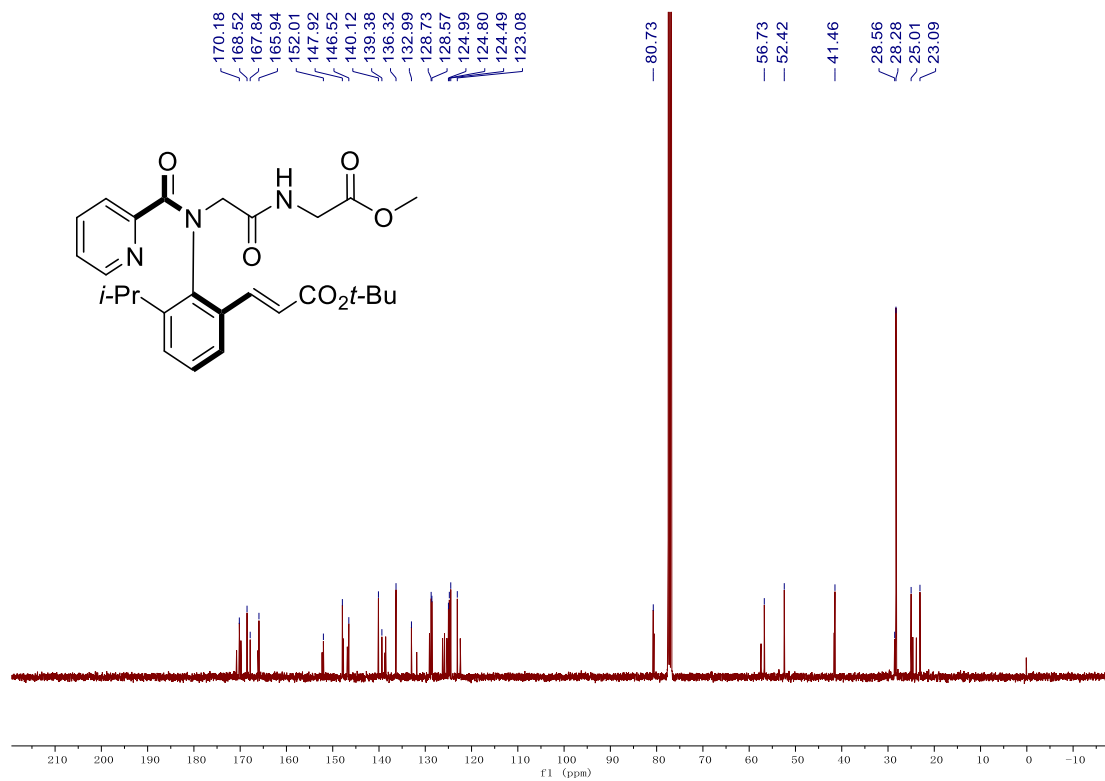

### 4d-<sup>1</sup>H NMR

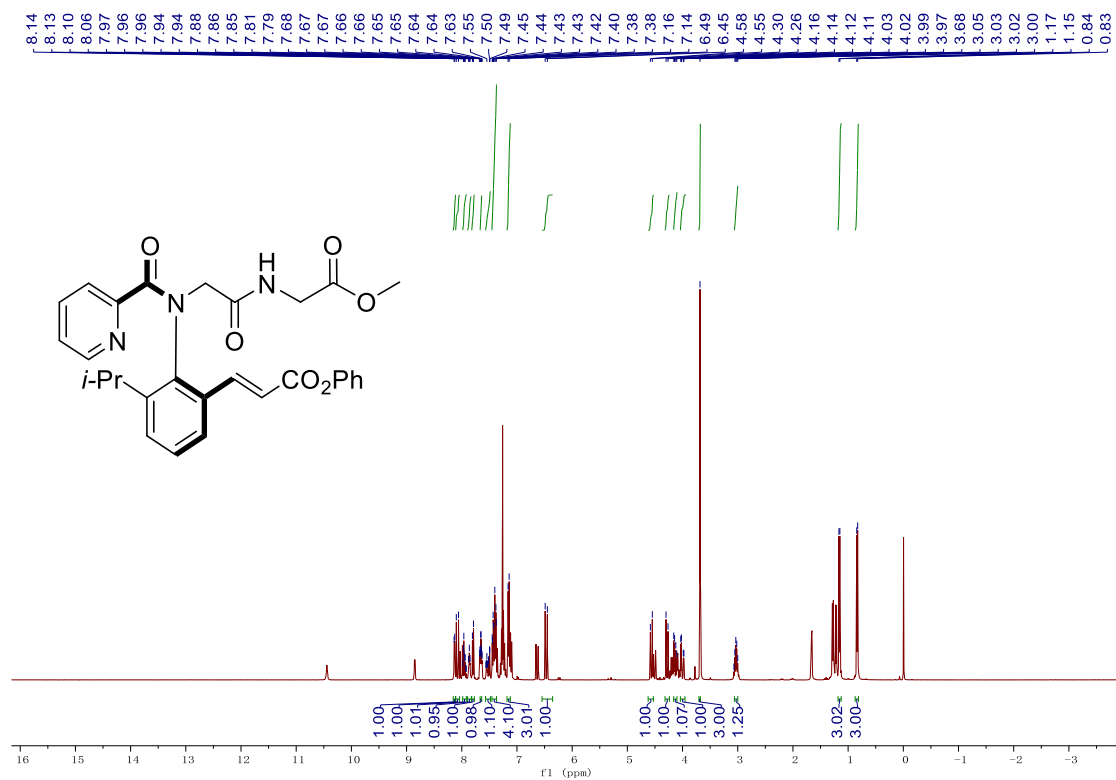

### 4d-<sup>13</sup>C NMR

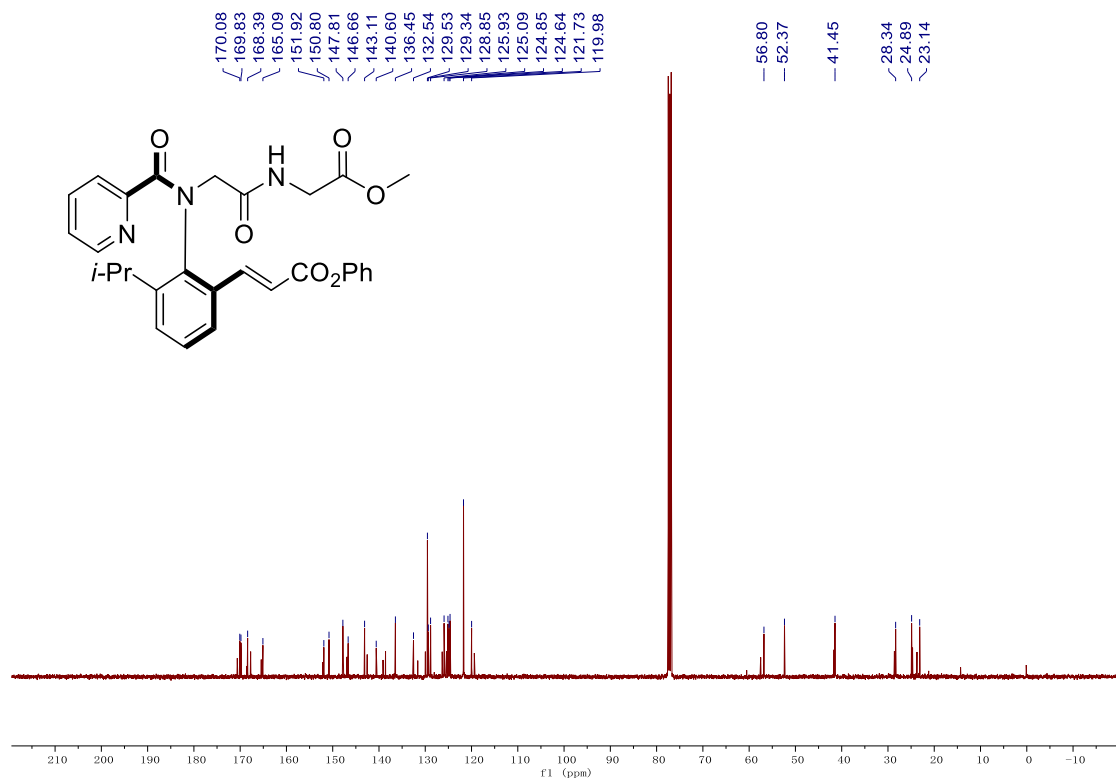



### 4e-<sup>1</sup>H NMR

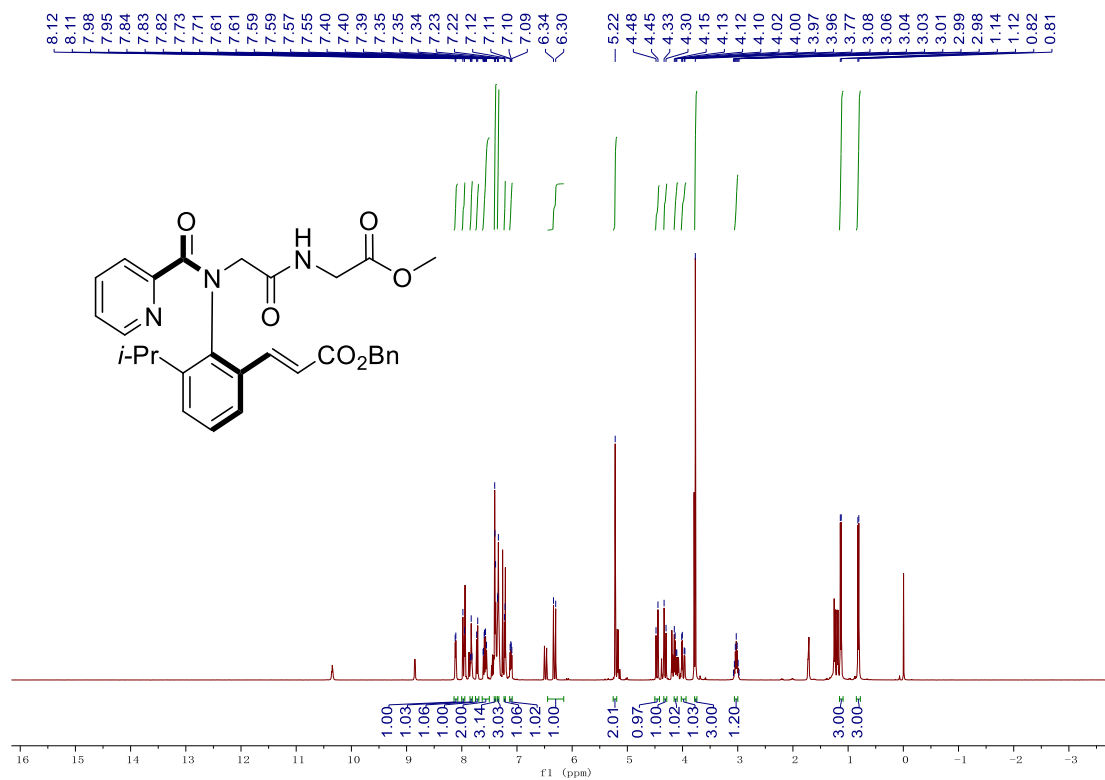

### 4e-<sup>13</sup>C NMR

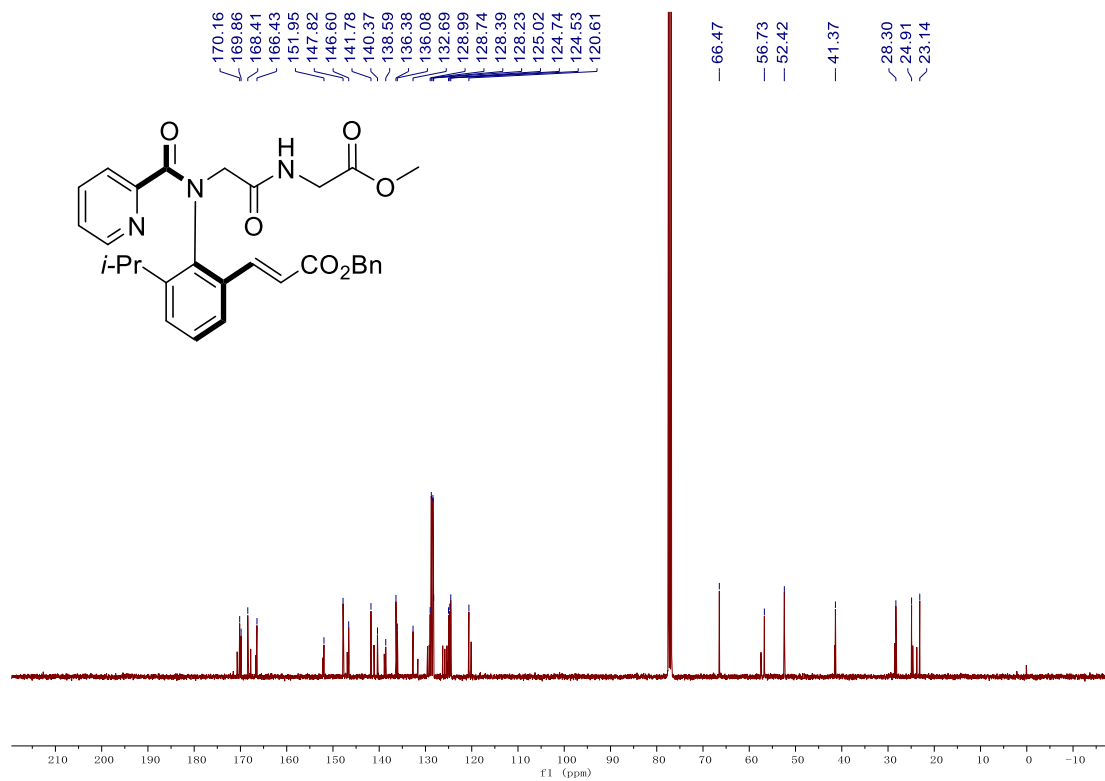

### 4f-<sup>1</sup>H NMR

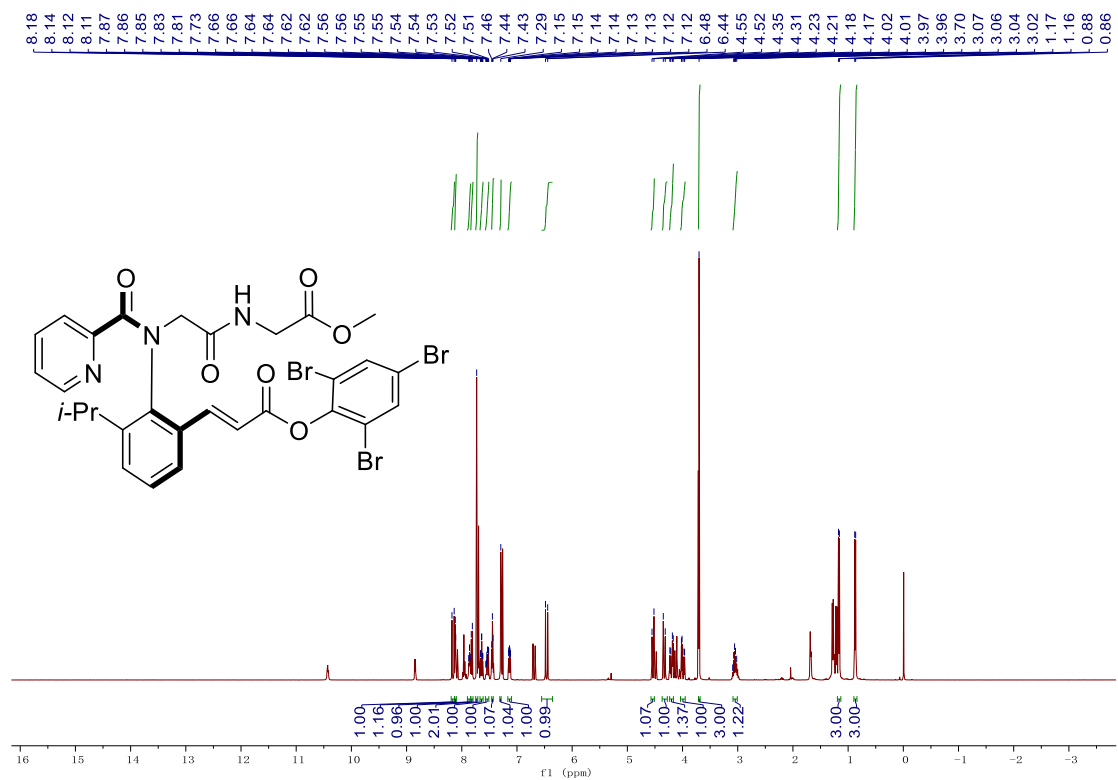

### 4f-<sup>13</sup>C NMR

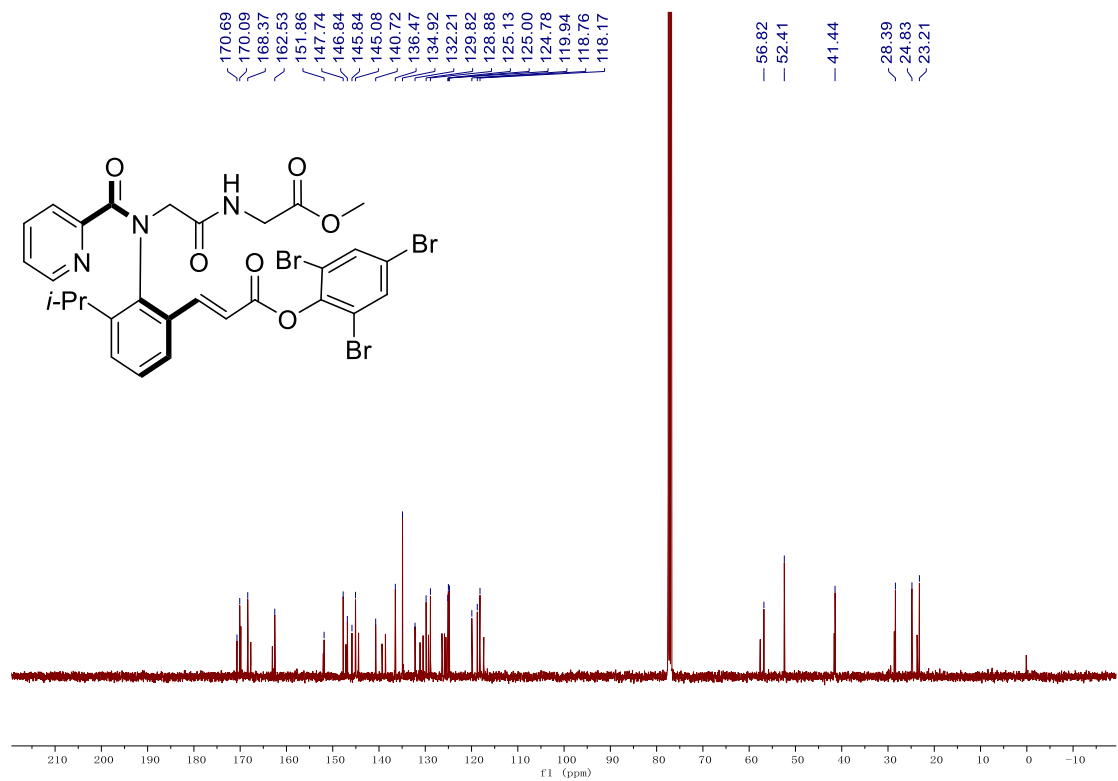

### 4g-<sup>1</sup>H NMR

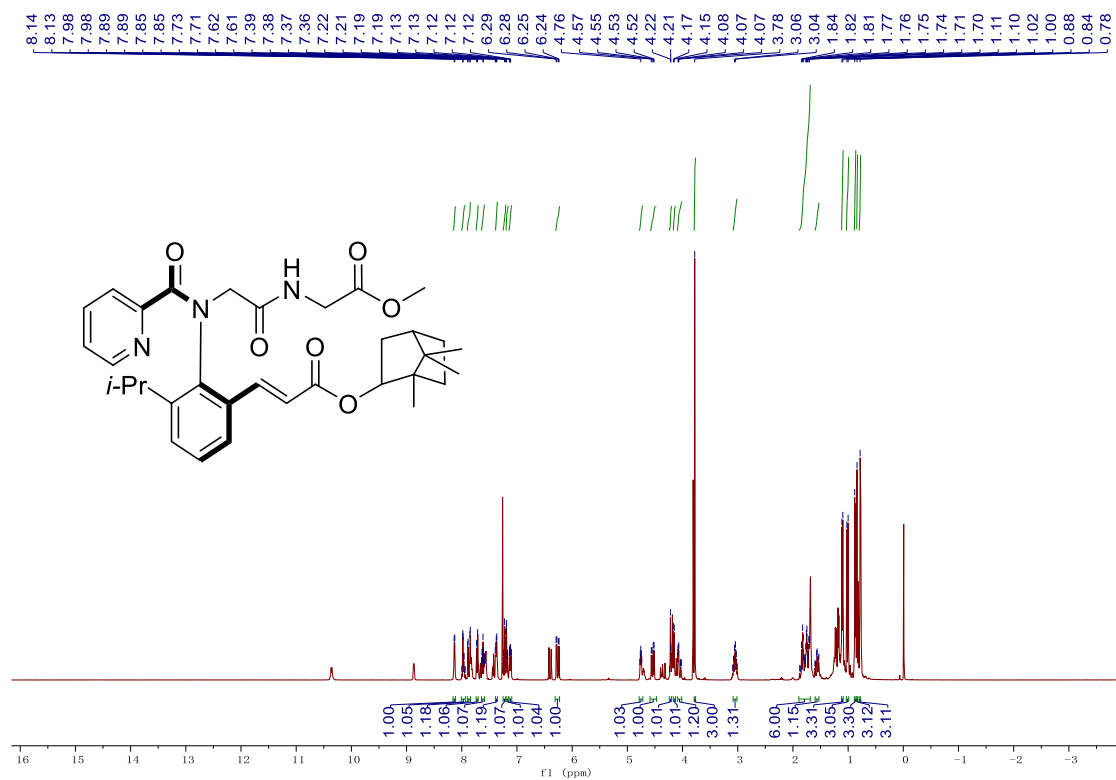

### 4g-<sup>13</sup>C NMR

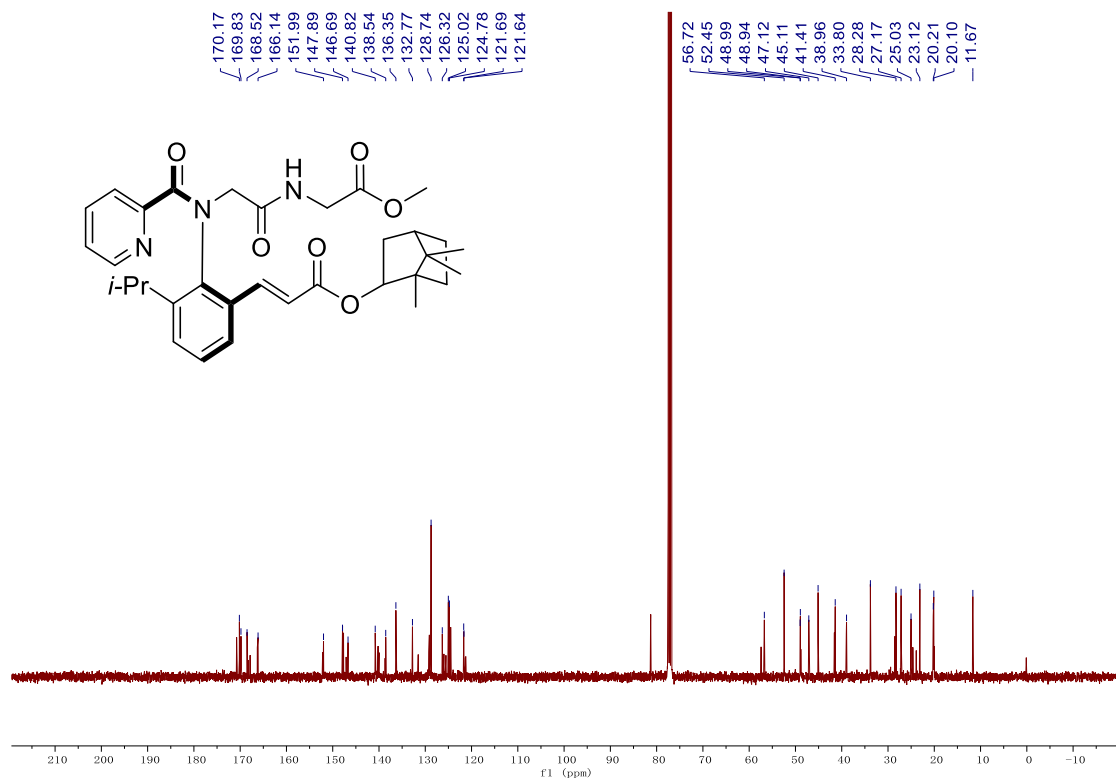

### 4h-<sup>1</sup>H NMR

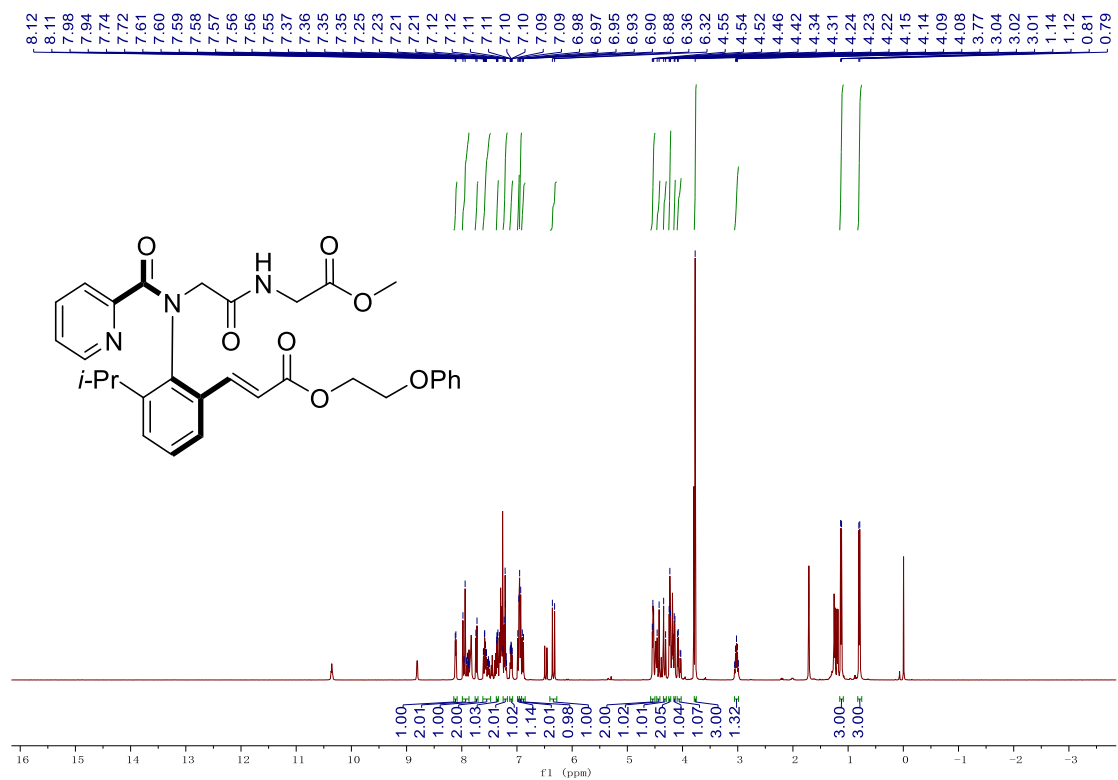

### 4h-<sup>13</sup>C NMR

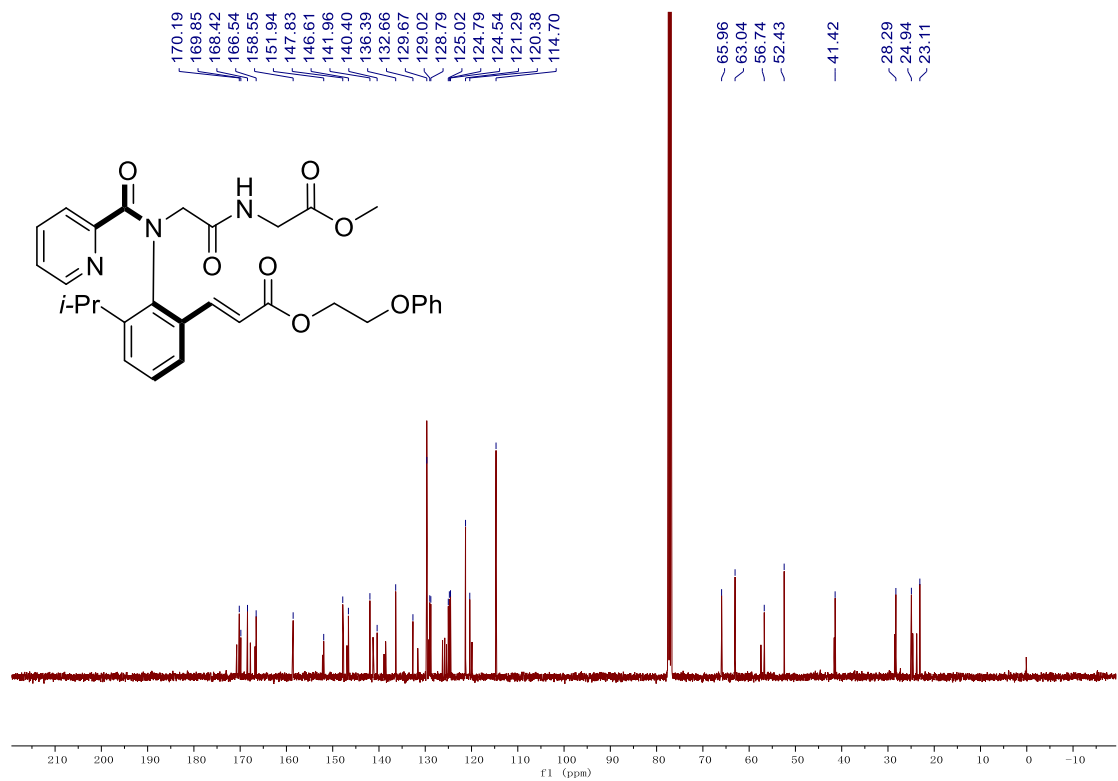

### 4i-<sup>1</sup>H NMR

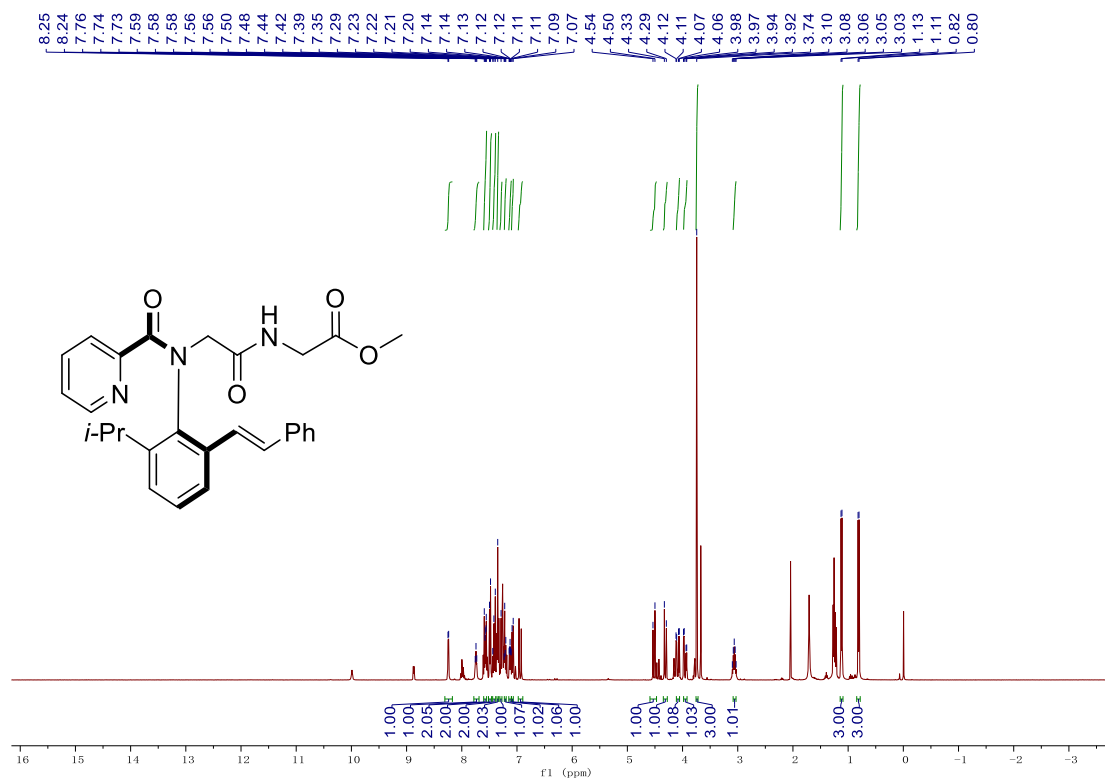

### 4i-<sup>13</sup>C NMR

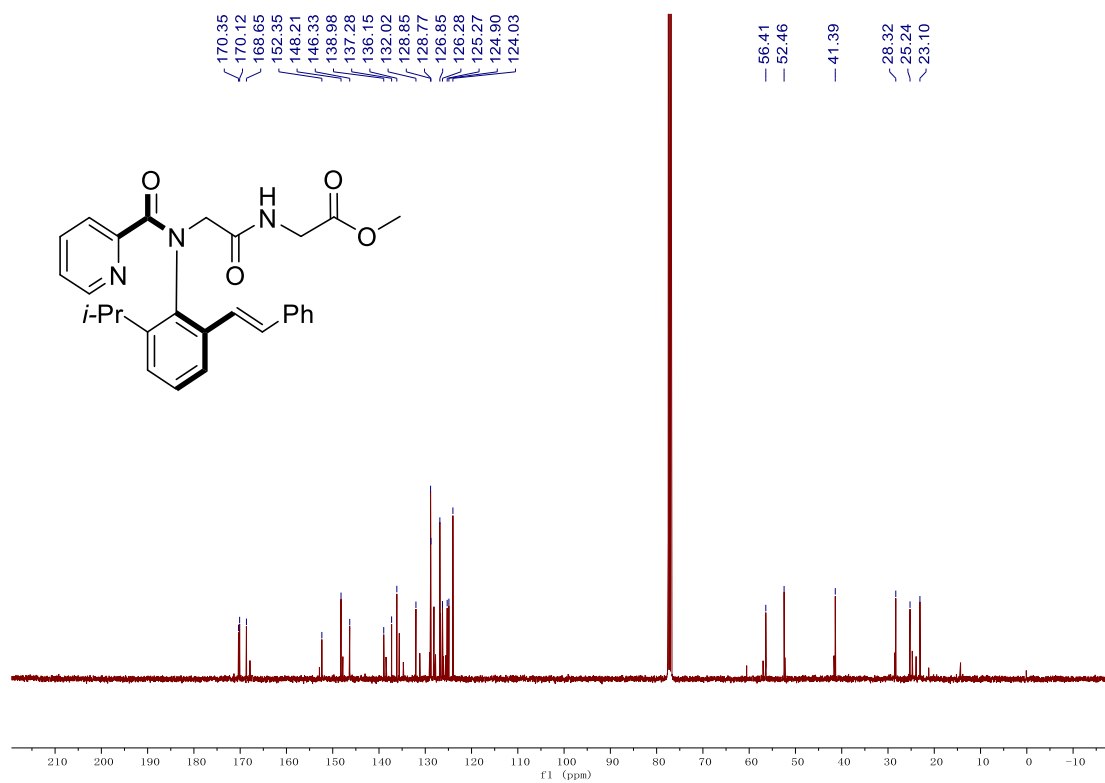

### 4j-<sup>1</sup>H NMR

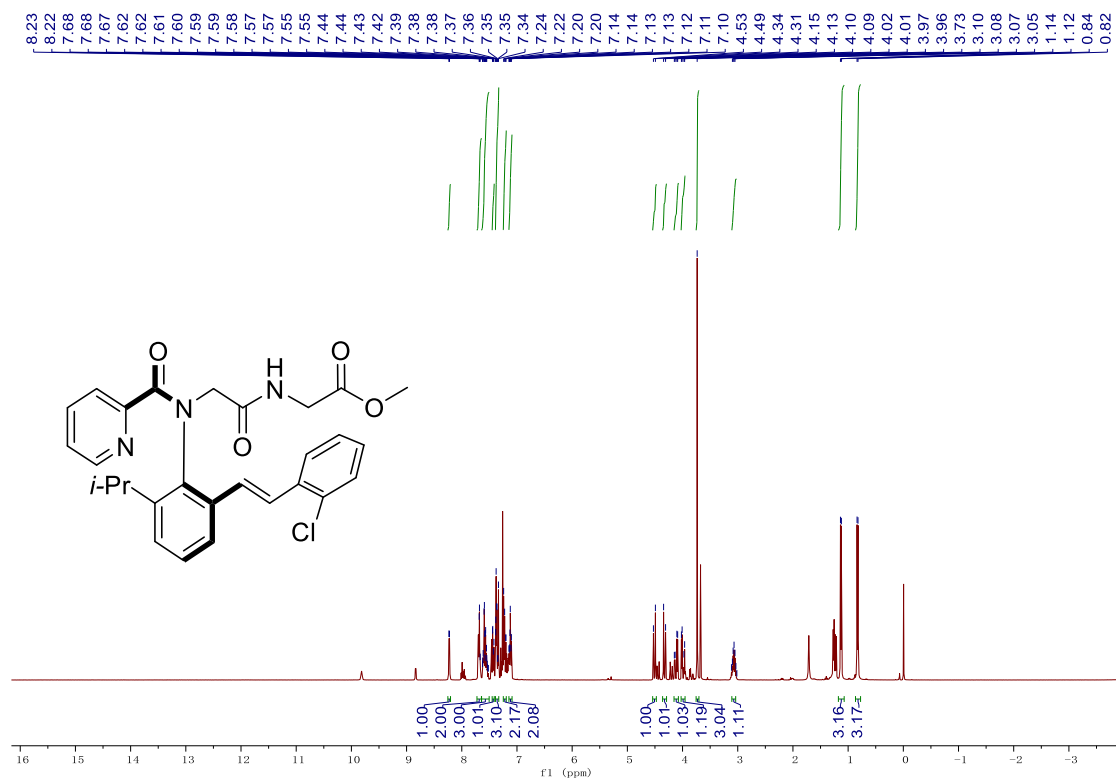

### 4j-<sup>13</sup>C NMR

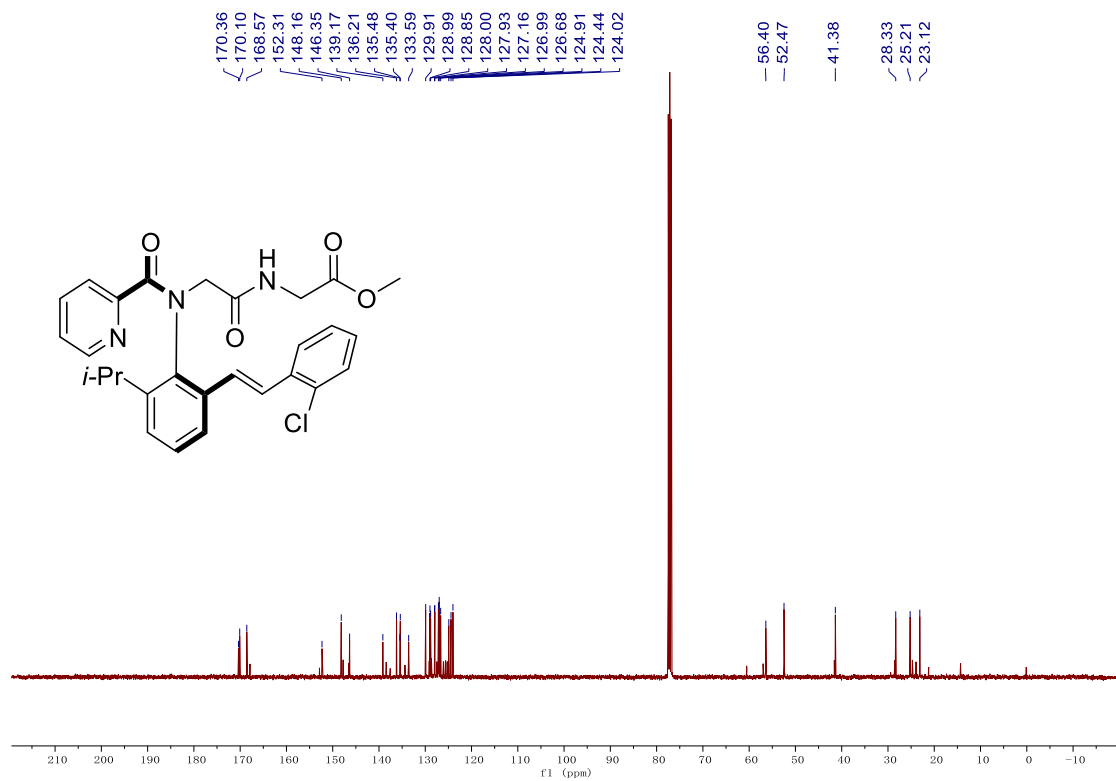

### 4k-<sup>1</sup>H NMR

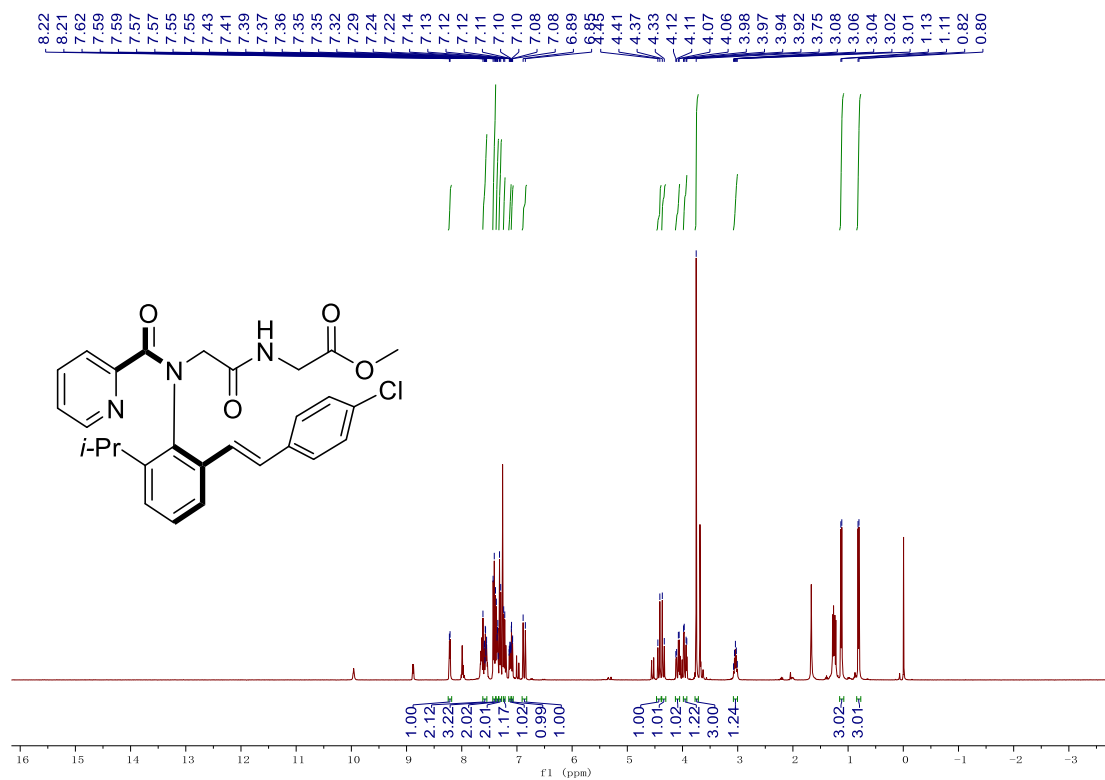

### 4k-<sup>13</sup>C NMR

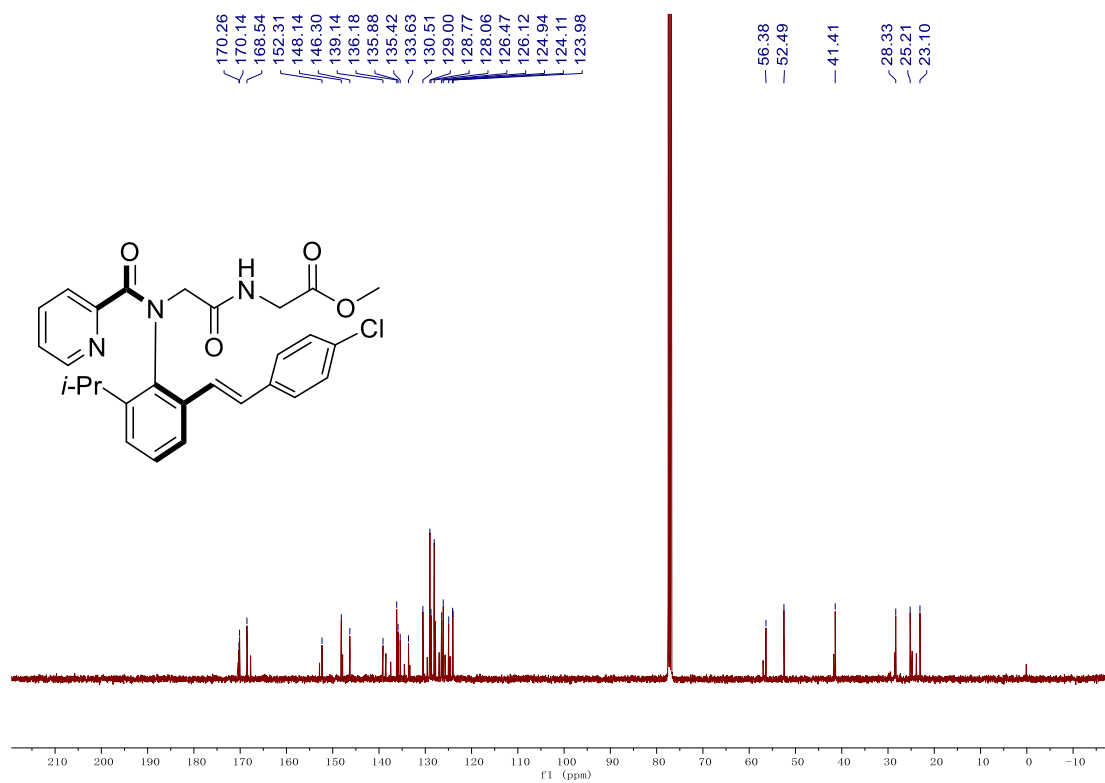

### 4I-<sup>1</sup>H NMR

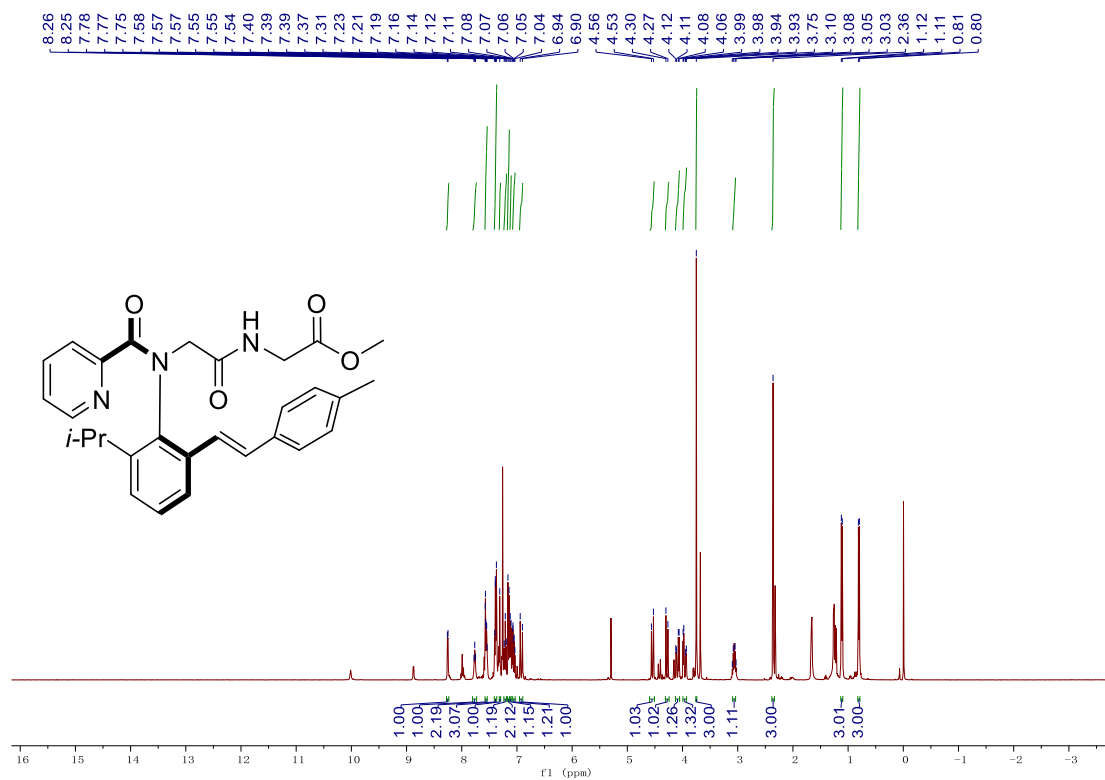

### 4I-<sup>13</sup>C NMR

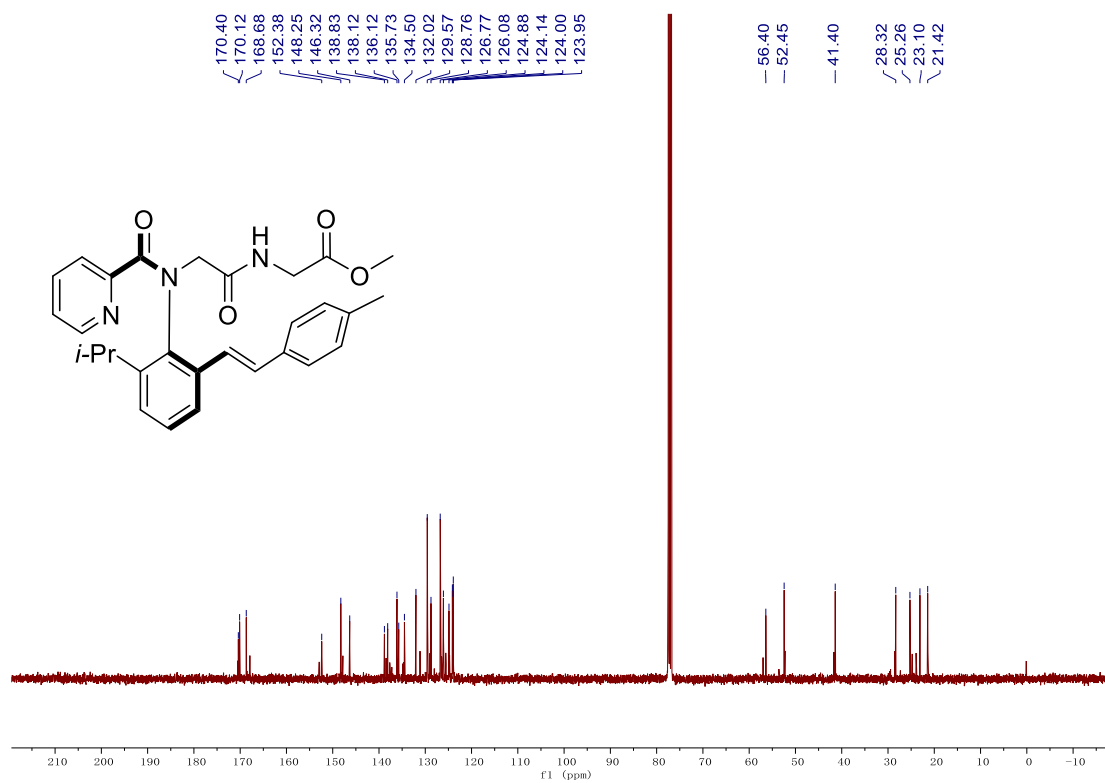



### 4m-<sup>1</sup>H NMR

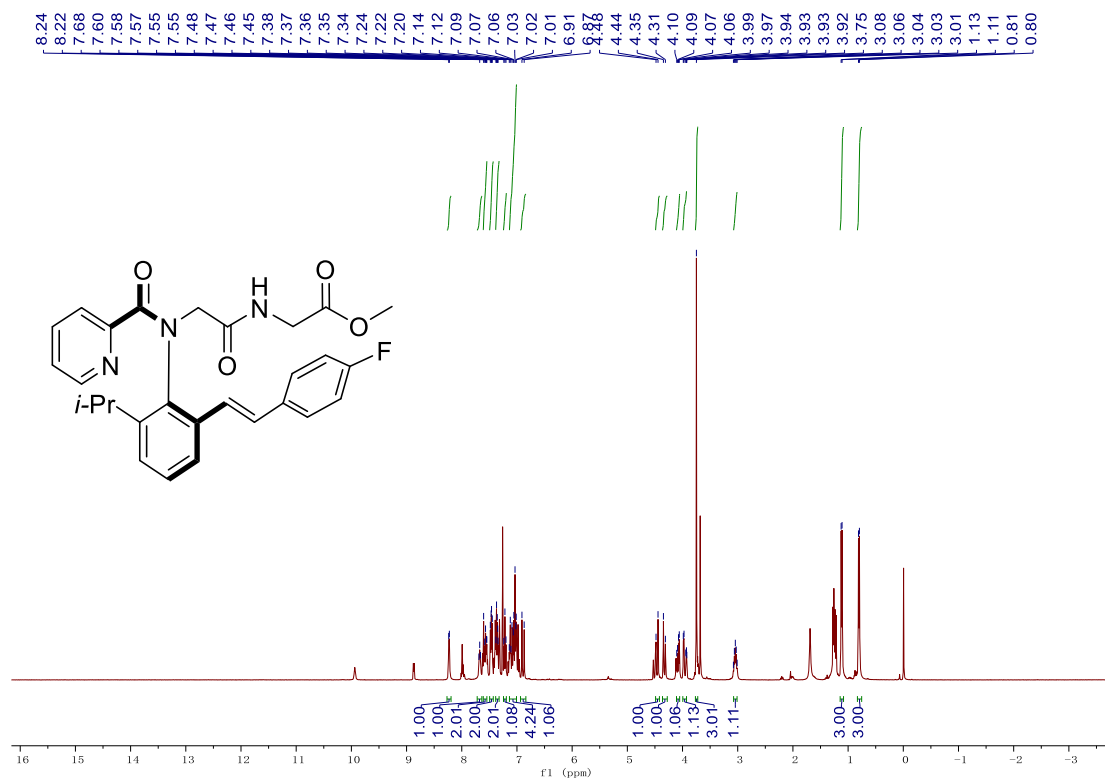

### 4m-<sup>13</sup>C NMR

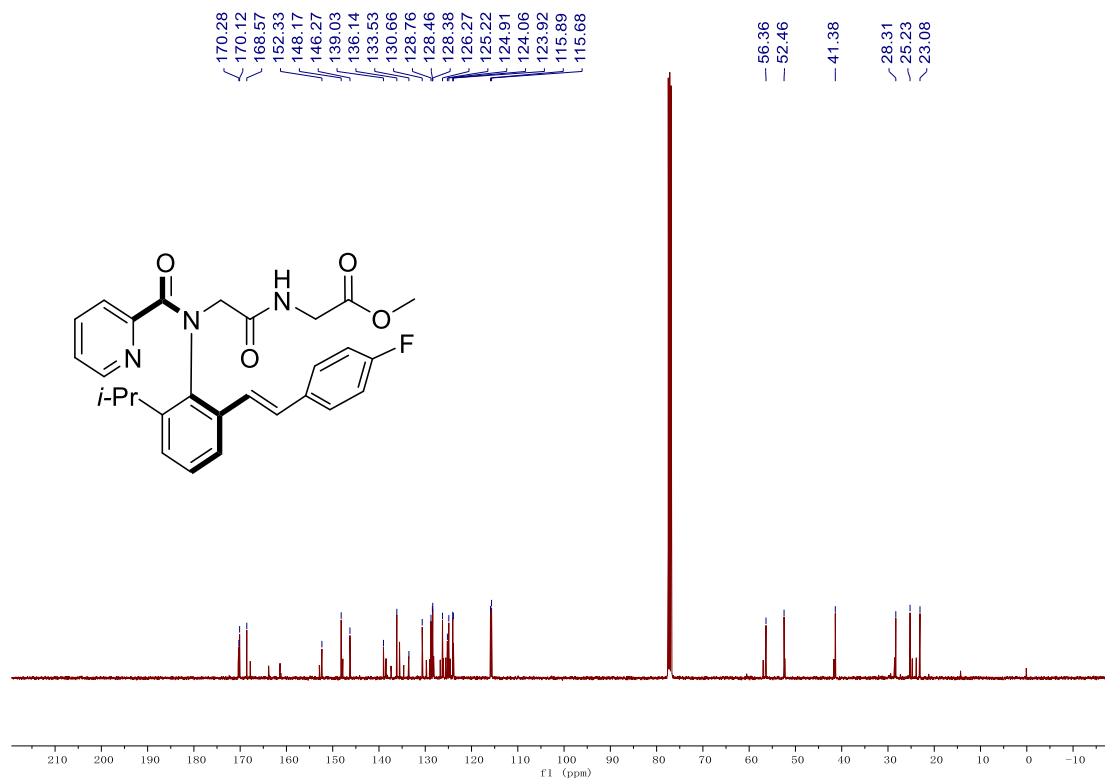

4m-<sup>19</sup>F

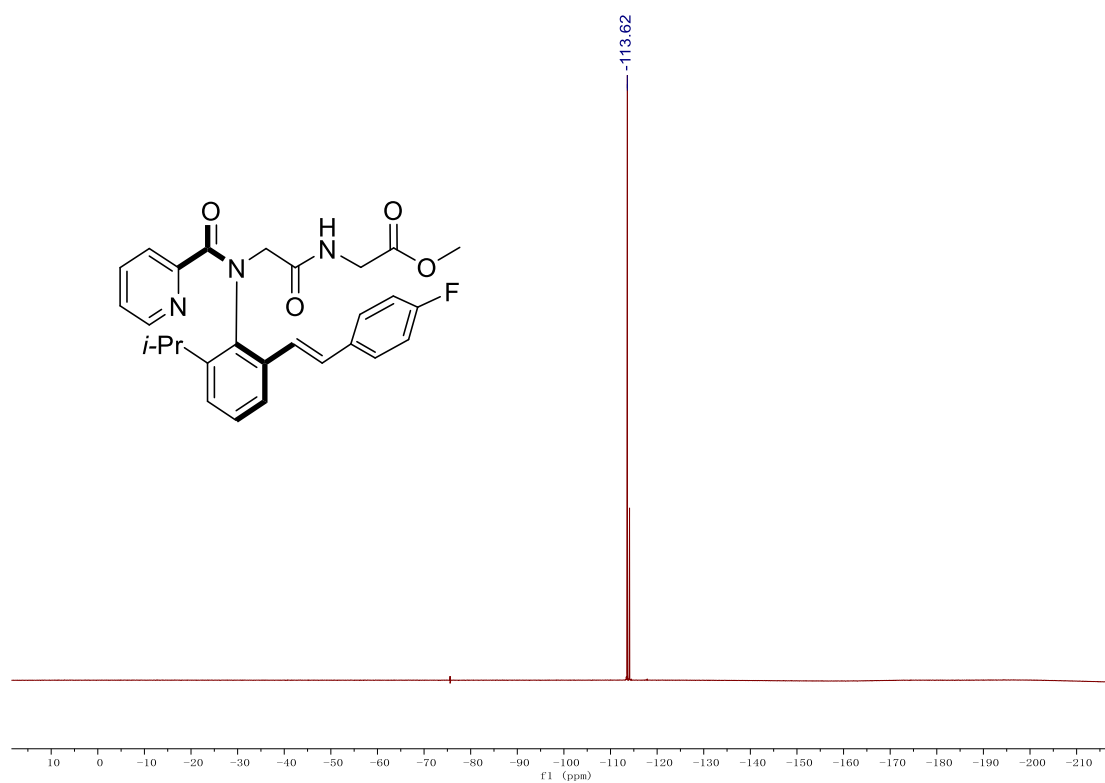

### 4n-<sup>1</sup>H NMR

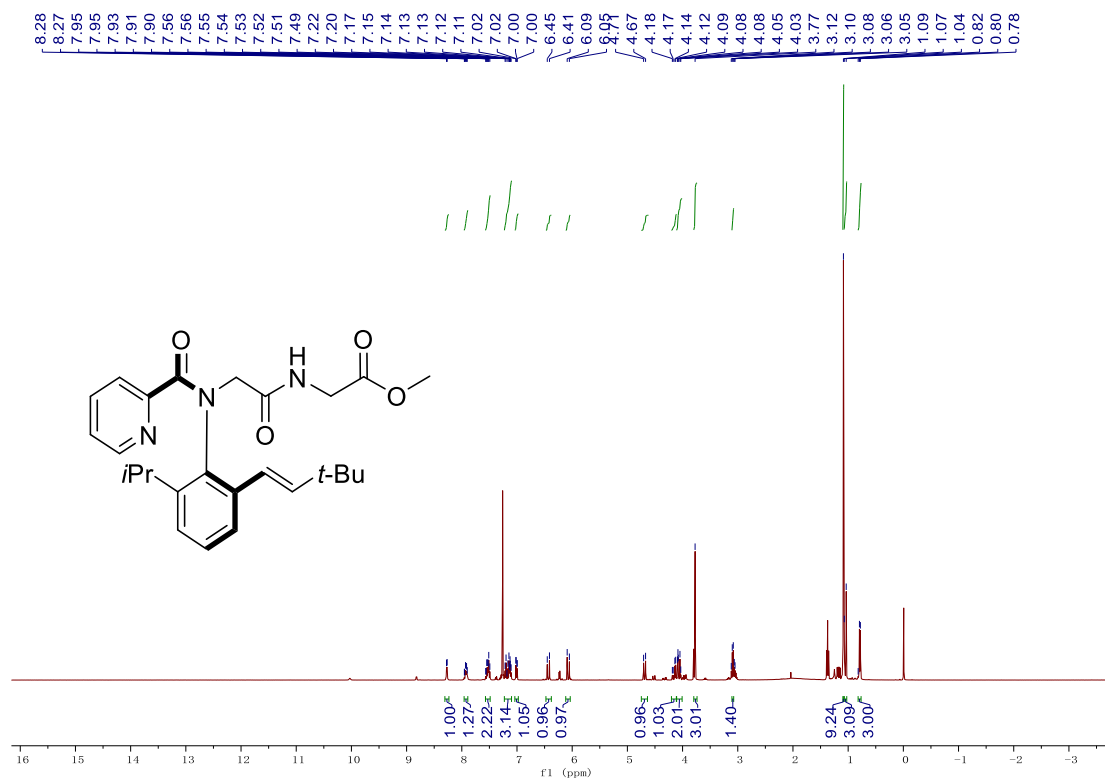

### 4n-<sup>13</sup>C NMR

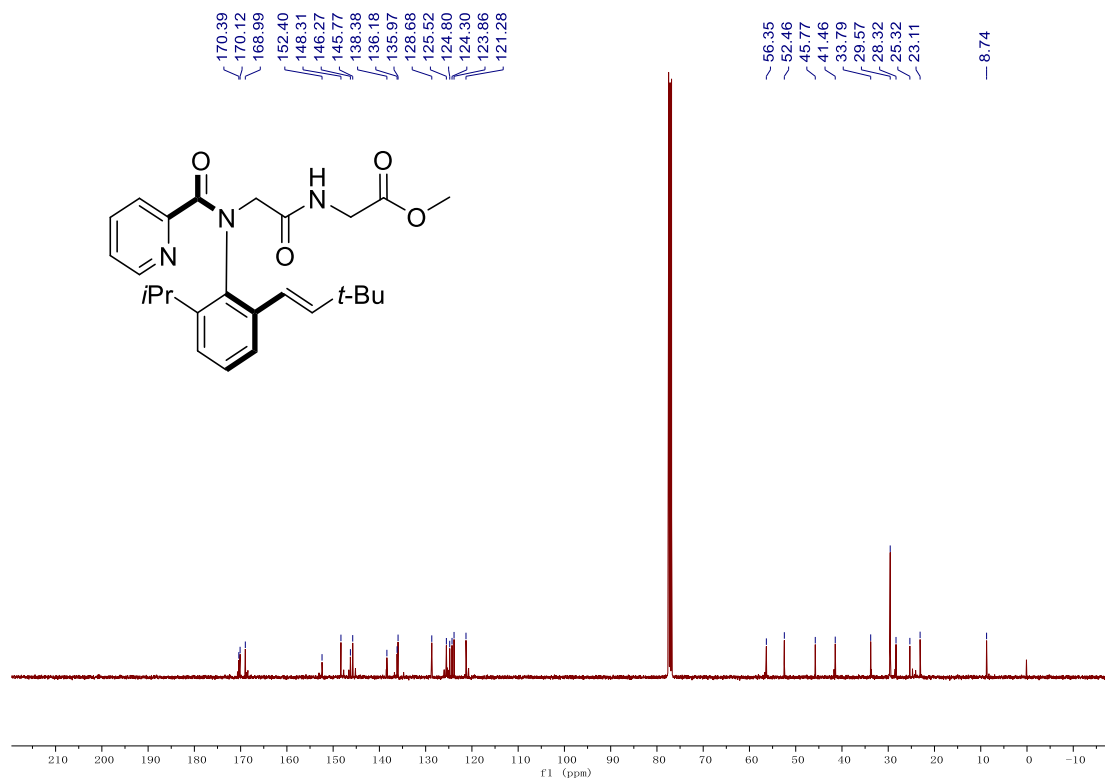

### 40-<sup>1</sup>H NMR

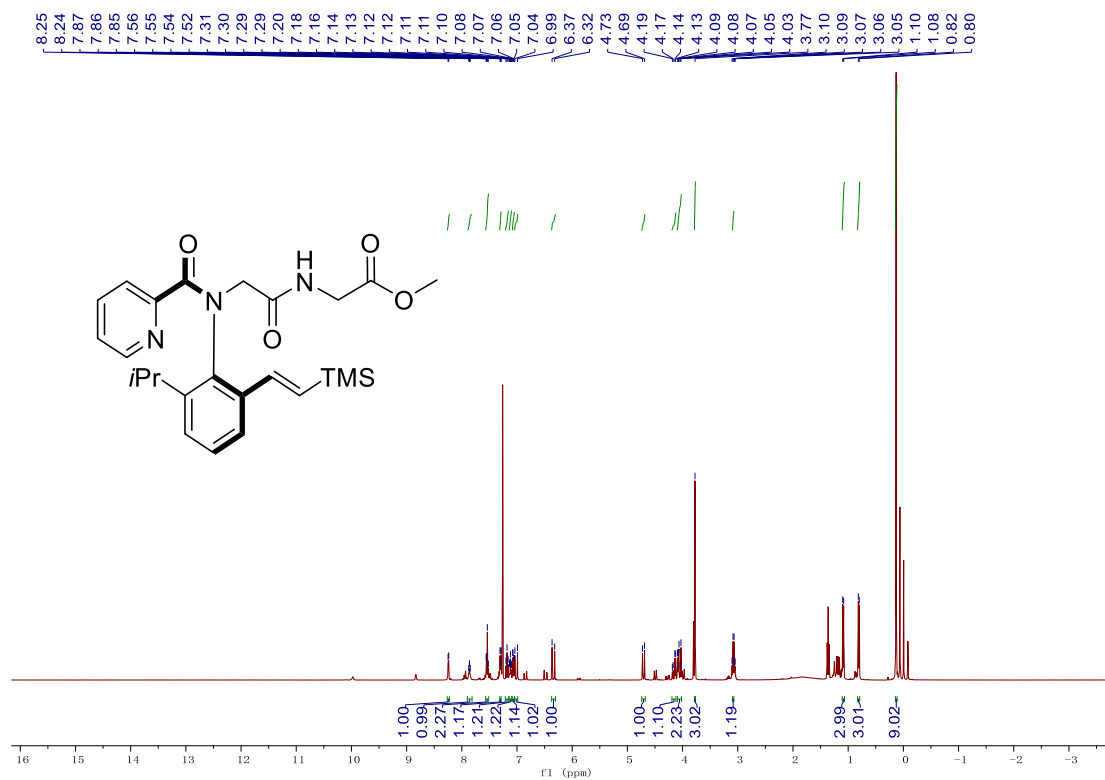

### 40-<sup>13</sup>C NMR

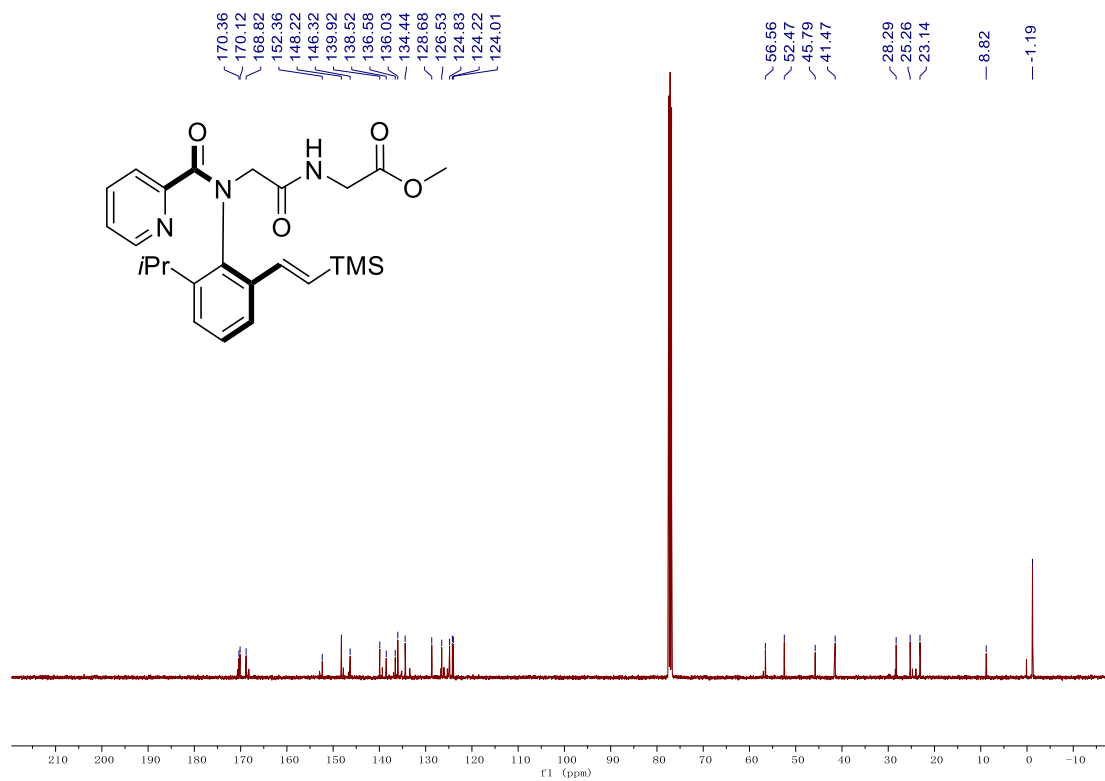

## 5. Copies of HPLC Analysis

3a: OD-H, Hexane/i-PrOH = 50/50, rate = 1.0 mL/min, 254 nm

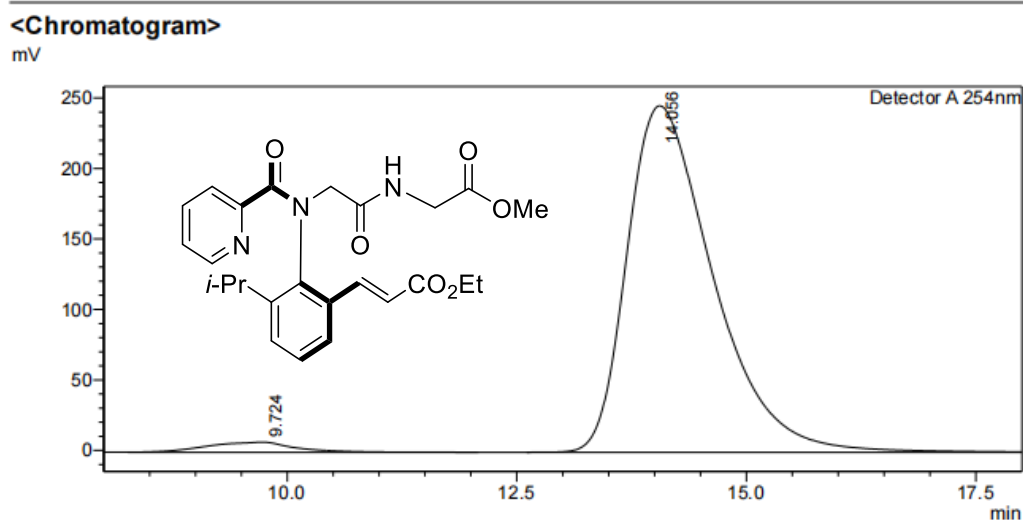

<Peak Table>

Detector A 254nm

| Peak# | Ret. Time | Area     | Height | Conc.  | Unit | Mark | Name |
|-------|-----------|----------|--------|--------|------|------|------|
| 1     | 9.724     | 480798   | 7211   | 2.910  |      |      |      |
| 2     | 14.056    | 16043337 | 245651 | 97.090 |      |      |      |
| Total |           | 16524135 | 252862 |        |      |      |      |

<Chromatogram>

mV

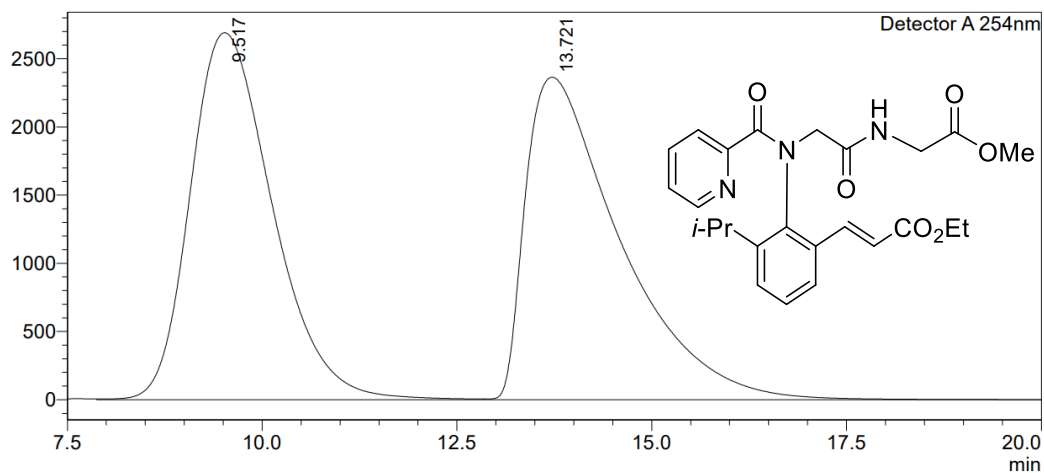

<Peak Table>

Detector A 254nm

| Peak# | Ret. Time | Area      | Height  | Conc.  | Unit | Mark | Name |
|-------|-----------|-----------|---------|--------|------|------|------|
| 1     | 9.517     | 197933119 | 2691289 | 49.673 |      |      |      |
| 2     | 13.721    | 200538966 | 2364863 | 50.327 |      | SV   |      |
| Total |           | 398472085 | 5056151 |        |      |      |      |

3b: AD-H, Hexane/i-PrOH =70/30, rate = 1.0 mL/min, 254 nm

<Chromatogram>

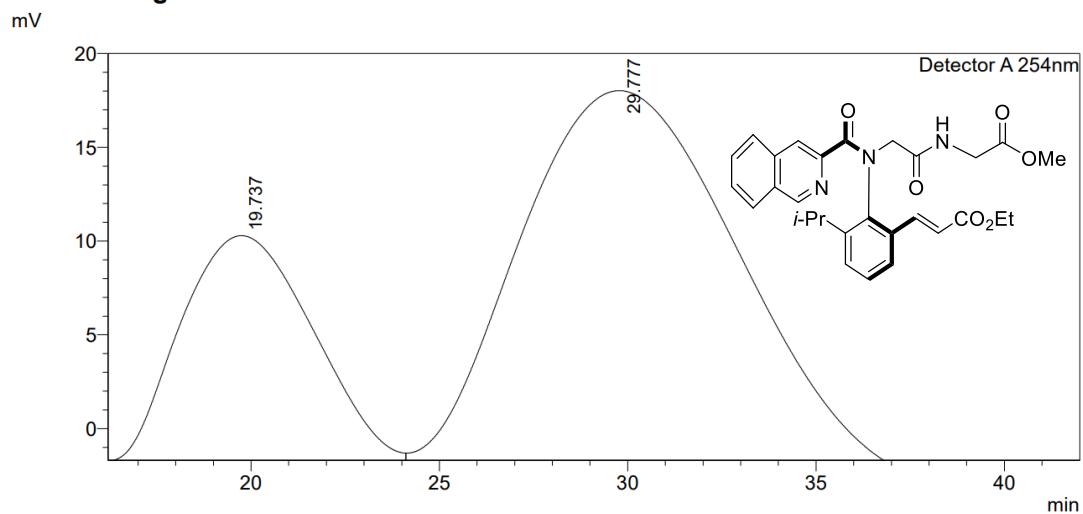

<Peak Table>

Detector A 254nm

| Peak# | Ret. Time | Area     | Height | Conc.  | Unit | Mark | Name |
|-------|-----------|----------|--------|--------|------|------|------|
| 1     | 19.737    | 3609647  | 13513  | 28.475 |      |      |      |
| 2     | 29.777    | 9066737  | 21343  | 71.525 |      | V    |      |
| Total |           | 12676384 | 34855  |        |      |      |      |

<Chromatogram>

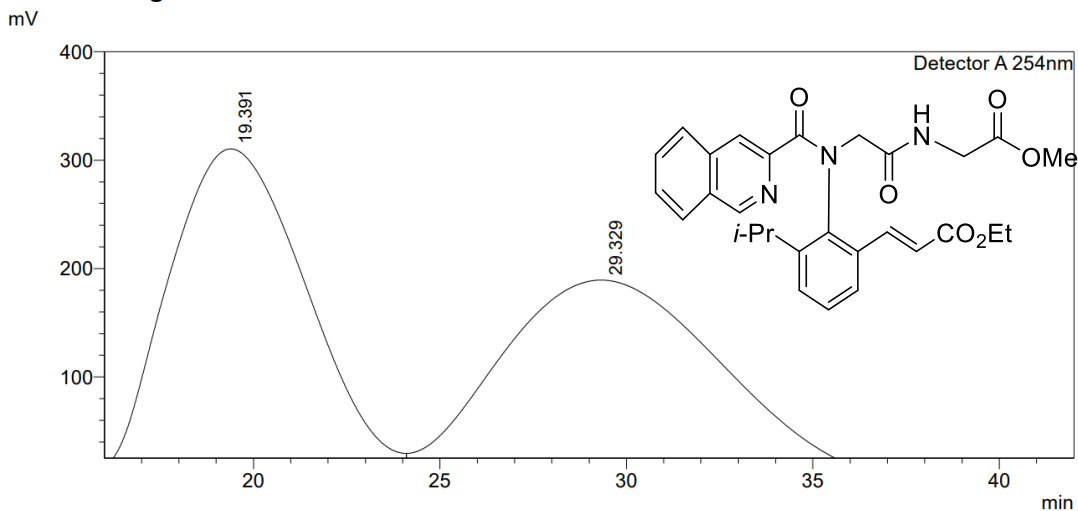

<Peak Table>

Detector A 254nm

| Peak# | Ret. Time | Area      | Height | Conc.  | Unit | Mark | Name |
|-------|-----------|-----------|--------|--------|------|------|------|
| 1     | 19.391    | 84906185  | 312881 | 50.490 |      |      |      |
| 2     | 29.329    | 83259028  | 192168 | 49.510 |      | V    |      |
| Total |           | 168165213 | 505049 |        |      |      |      |

3c: OD-H, Hexane/i-PrOH = 50/50, rate = 1.0 mL/min, 254 nm

<Chromatogram>

mV

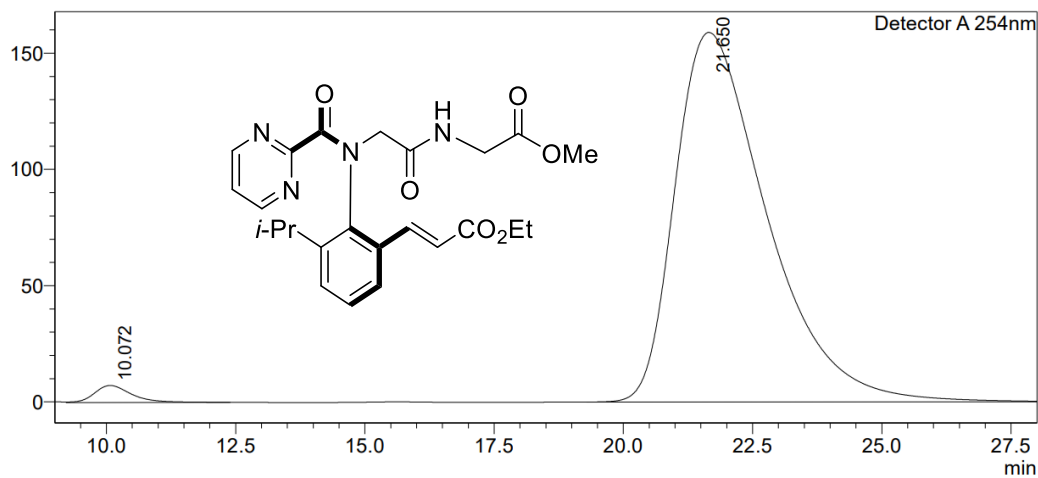

<Peak Table>

Detector A 254nm

| Peak# | Ret. Time | Area     | Height | Conc.  | Unit | Mark | Name |
|-------|-----------|----------|--------|--------|------|------|------|
| 1     | 10.072    | 364067   | 7315   | 1.815  |      |      |      |
| 2     | 21.650    | 19696748 | 159009 | 98.185 |      |      |      |
| Total |           | 20060815 | 166324 |        |      |      |      |

<Chromatogram>

mV

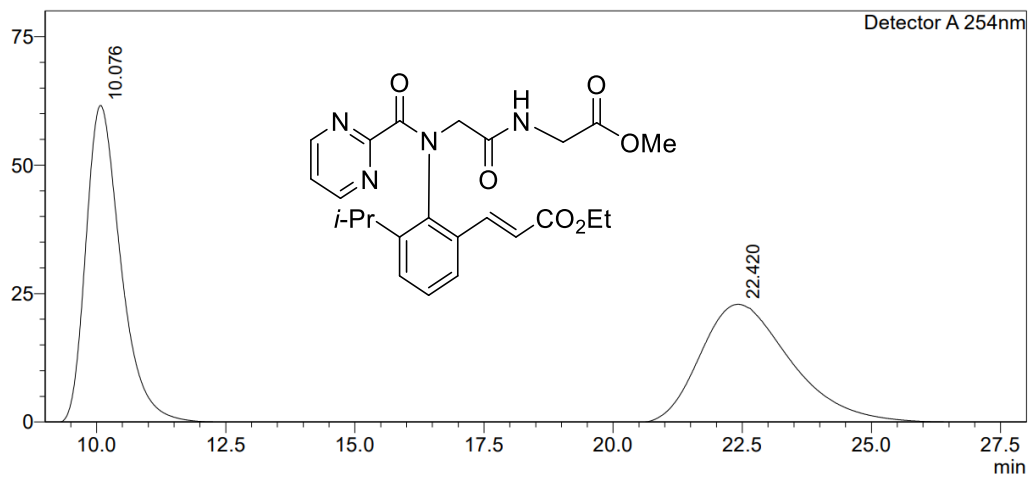

<Peak Table>

Detector A 254nm

| Peak# | Ret. Time | Area    | Height | Conc.  | Unit | Mark | Name |
|-------|-----------|---------|--------|--------|------|------|------|
| 1     | 10.076    | 2973468 | 62025  | 50.530 |      |      |      |
| 2     | 22.420    | 2911075 | 23307  | 49.470 |      |      |      |
| Total |           | 5884543 | 85332  |        |      |      |      |

3d: AD-H, Hexane/i-PrOH = 50/50, rate = 1.0 mL/min, 254 nm

<Chromatogram>

mV

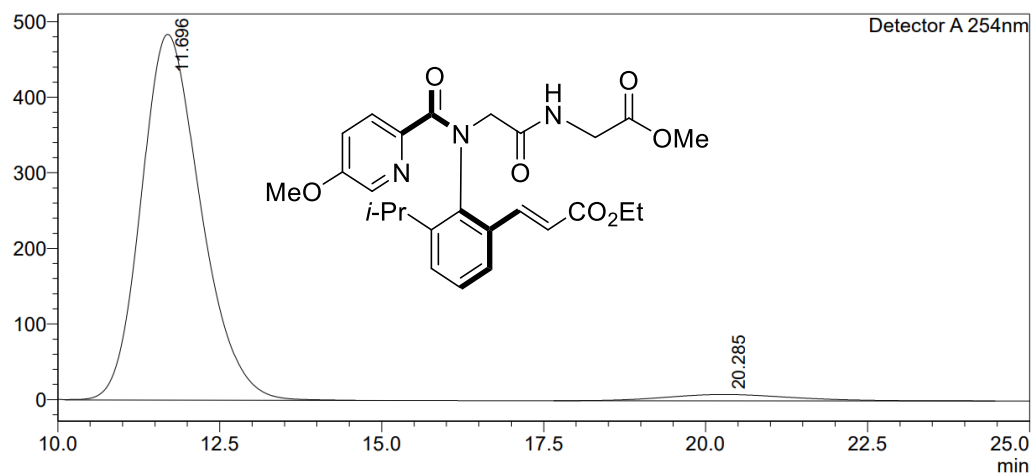

<Peak Table>

Detector A 254nm

| Peak# | Ret. Time | Area     | Height | Conc.  | Unit | Mark | Name |
|-------|-----------|----------|--------|--------|------|------|------|
| 1     | 11.696    | 31023116 | 483938 | 96.507 |      |      |      |
| 2     | 20.285    | 1123004  | 8333   | 3.493  |      |      |      |
| Total |           | 32146119 | 492271 |        |      |      |      |

<Chromatogram>

mV

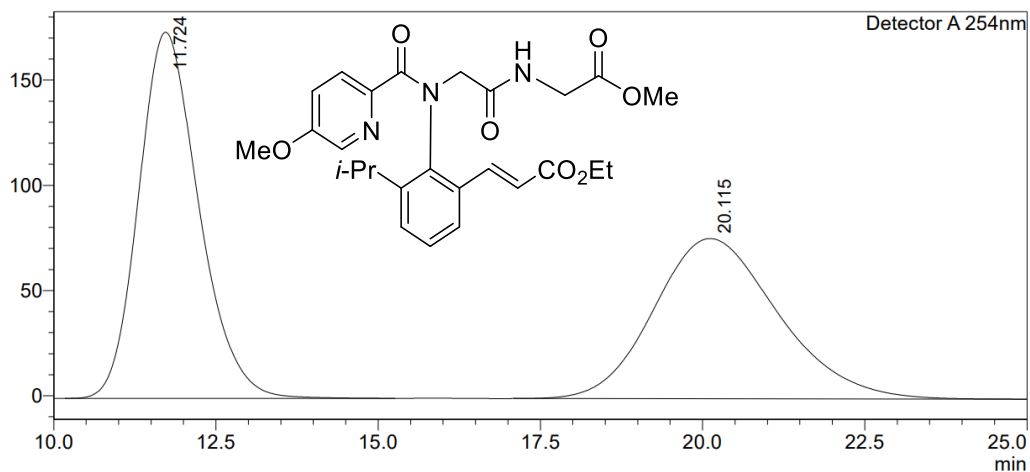

<Peak Table>

Detector A 254nm

| Peak# | Ret. Time | Area     | Height | Conc.  | Unit | Mark | Name |
|-------|-----------|----------|--------|--------|------|------|------|
| 1     | 11.724    | 11249201 | 173962 | 52.519 |      |      |      |
| 2     | 20.115    | 10170144 | 76119  | 47.481 |      |      |      |
| Total |           | 21419345 | 250081 |        |      |      |      |



3e: AD-H, Hexane/i-PrOH = 50/50, rate = 1.0 mL/min, 254 nm

<Chromatogram>

mV

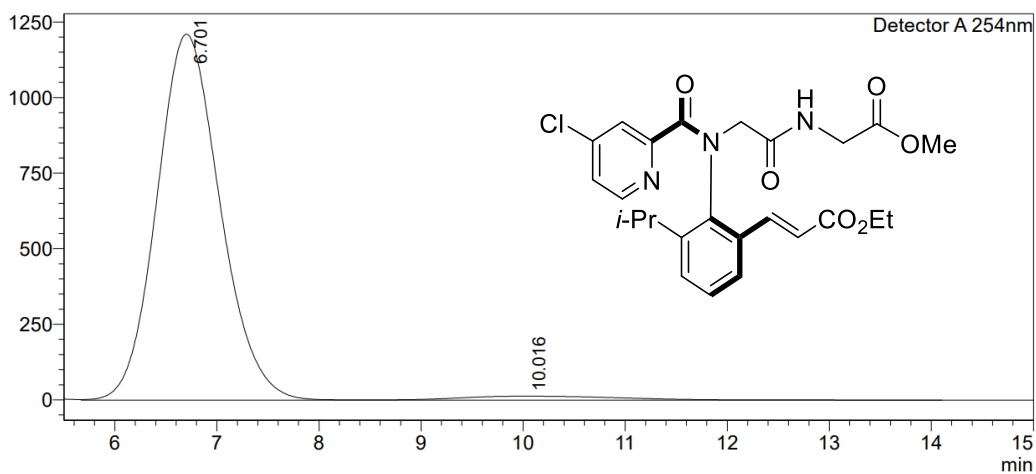

<Peak Table>

Detector A 254nm

| Peak# | Ret. Time | Area     | Height  | Conc.  | Unit | Mark | Name |
|-------|-----------|----------|---------|--------|------|------|------|
| 1     | 6.701     | 52205981 | 1210256 | 97.348 |      |      |      |
| 2     | 10.016    | 1422402  | 12880   | 2.652  |      | V    |      |
| Total |           | 53628383 | 1223136 |        |      |      |      |

<Chromatogram>

mV

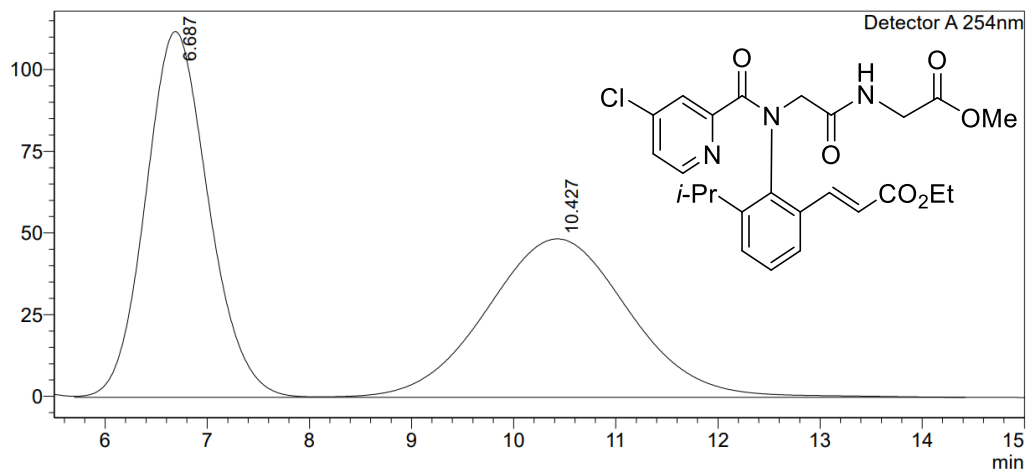

<Peak Table>

Detector A 254nm

| Peak# | Ret. Time | Area    | Height | Conc.  | Unit | Mark | Name |
|-------|-----------|---------|--------|--------|------|------|------|
| 1     | 6.687     | 4796728 | 111928 | 50.365 |      |      |      |
| 2     | 10.427    | 4727147 | 48478  | 49.635 |      | V    |      |
| Total |           | 9523875 | 160406 |        |      |      |      |

3f: AD-H, Hexane/i-PrOH = 50/50, rate = 1.0 mL/min, 254 nm

<Chromatogram>

mV

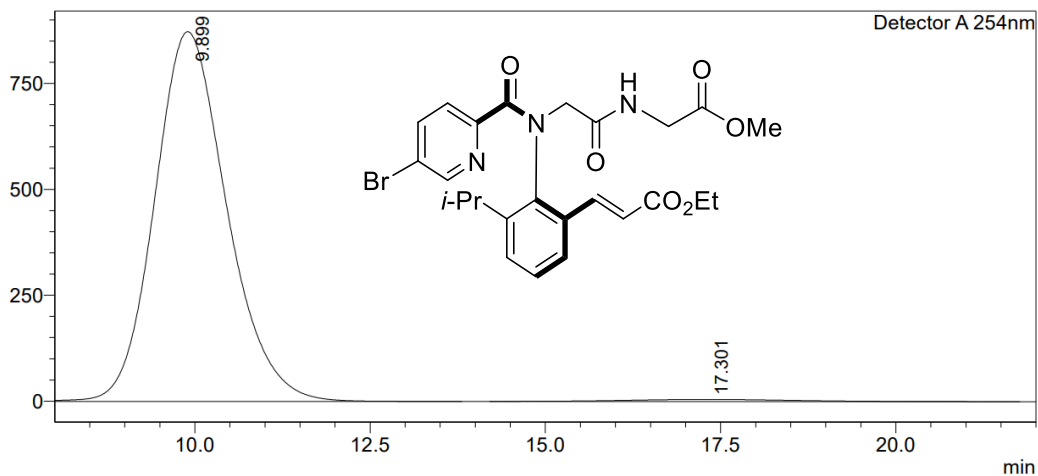

<Peak Table>

Detector A 254nm

| Peak# | Ret. Time | Area     | Height | Conc.  | Unit | Mark | Name |
|-------|-----------|----------|--------|--------|------|------|------|
| 1     | 9.899     | 62511770 | 873095 | 98.700 |      |      |      |
| 2     | 17.301    | 823567   | 4862   | 1.300  |      |      |      |
| Total |           | 63335337 | 877957 |        |      |      |      |

<Chromatogram>

mV

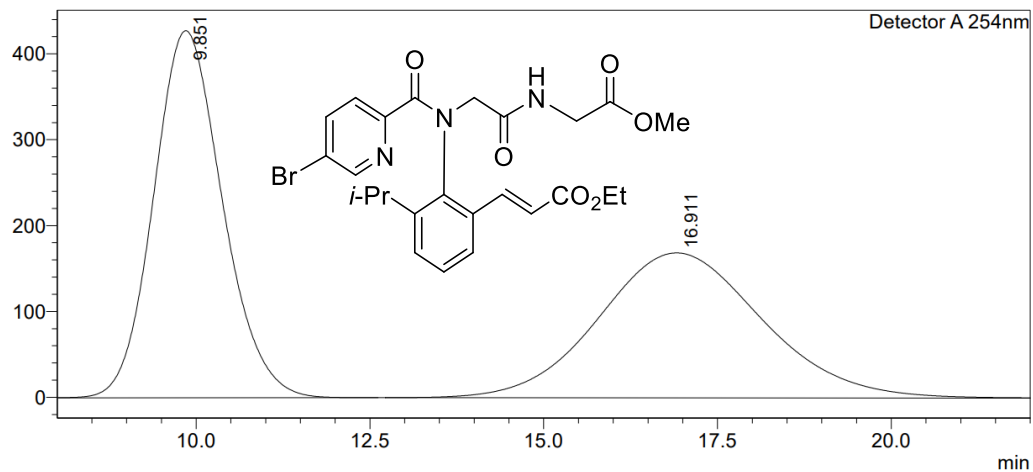

<Peak Table>

Detector A 254nm

| Peak# | Ret. Time | Area     | Height | Conc.  | Unit | Mark | Name |
|-------|-----------|----------|--------|--------|------|------|------|
| 1     | 9.851     | 29475479 | 427512 | 51.505 |      |      |      |
| 2     | 16.911    | 27753083 | 168757 | 48.495 |      |      |      |
| Total |           | 57228562 | 596269 |        |      |      |      |

3g: OD-H, Hexane/i-PrOH = 50/50, rate = 1.0 mL/min, 254 nm

<Chromatogram>

mV

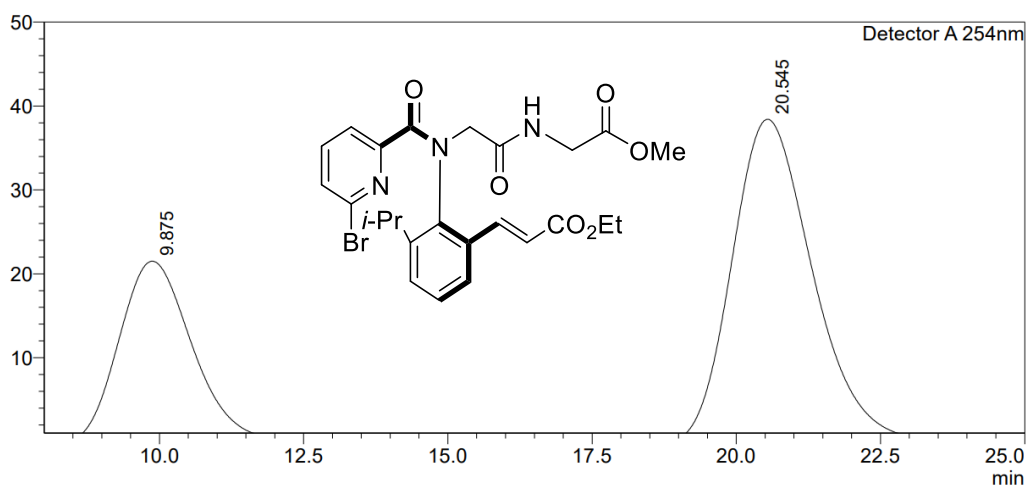

<Peak Table>

Detector A 254nm

| Peak# | Ret. Time | Area    | Height | Conc.  | Unit | Mark | Name |
|-------|-----------|---------|--------|--------|------|------|------|
| 1     | 9.875     | 1856641 | 21440  | 32.647 |      |      |      |
| 2     | 20.545    | 3830452 | 38760  | 67.353 |      |      |      |
| Total |           | 5687093 | 60200  |        |      |      |      |

<Chromatogram>

mV

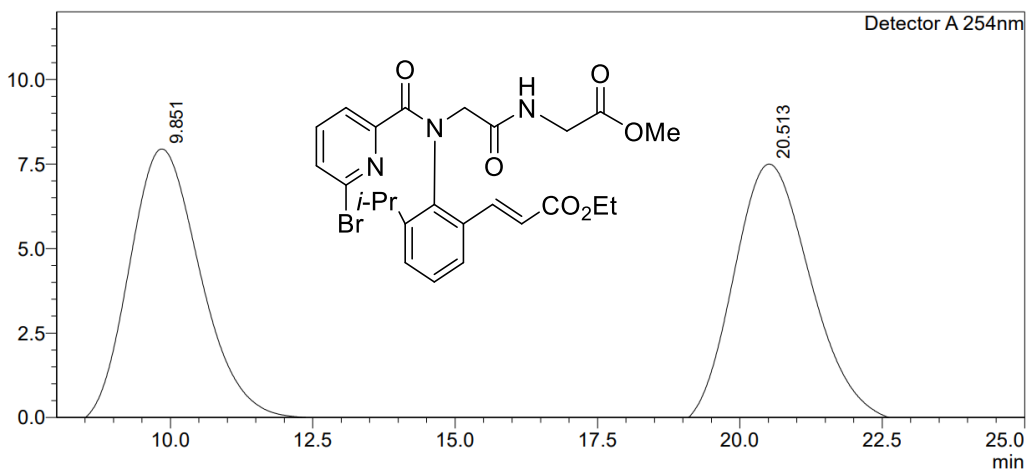

<Peak Table>

Detector A 254nm

| Peak# | Ret. Time | Area    | Height | Conc.  | Unit | Mark | Name |
|-------|-----------|---------|--------|--------|------|------|------|
| 1     | 9.851     | 739522  | 8153   | 49.109 |      |      |      |
| 2     | 20.513    | 766343  | 7810   | 50.891 |      |      |      |
| Total |           | 1505865 | 15963  |        |      |      |      |

3h: AD-H, Hexane/i-PrOH = 50/50, rate = 1.0 mL/min, 254 nm

<Chromatogram>

mV

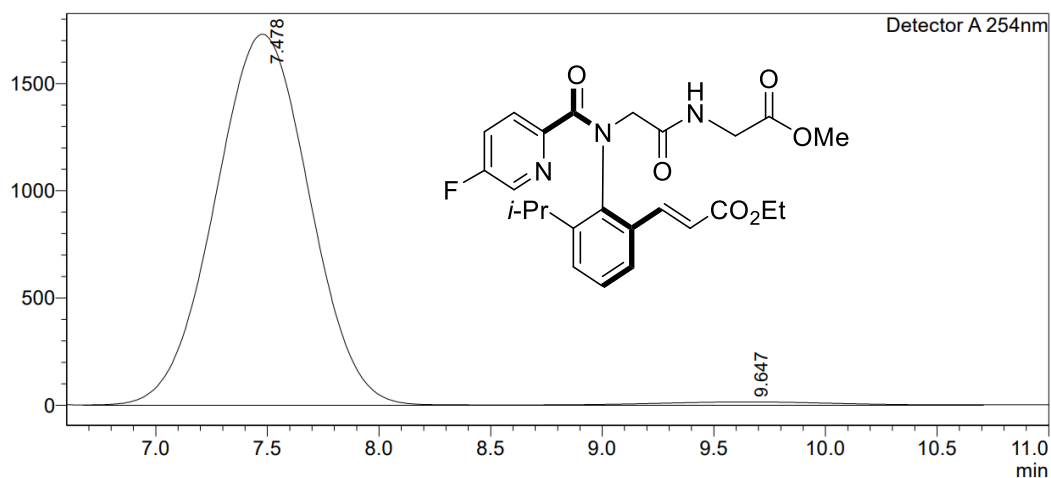

<Peak Table>

Detector A 254nm

| Peak# | Ret. Time | Area     | Height  | Conc.  | Unit | Mark | Name |
|-------|-----------|----------|---------|--------|------|------|------|
| 1     | 7.478     | 51012590 | 1730522 | 98.170 |      |      |      |
| 2     | 9.647     | 950867   | 15661   | 1.830  |      | V    |      |
| Total |           | 51963457 | 1746183 |        |      |      |      |

<Chromatogram>

mV

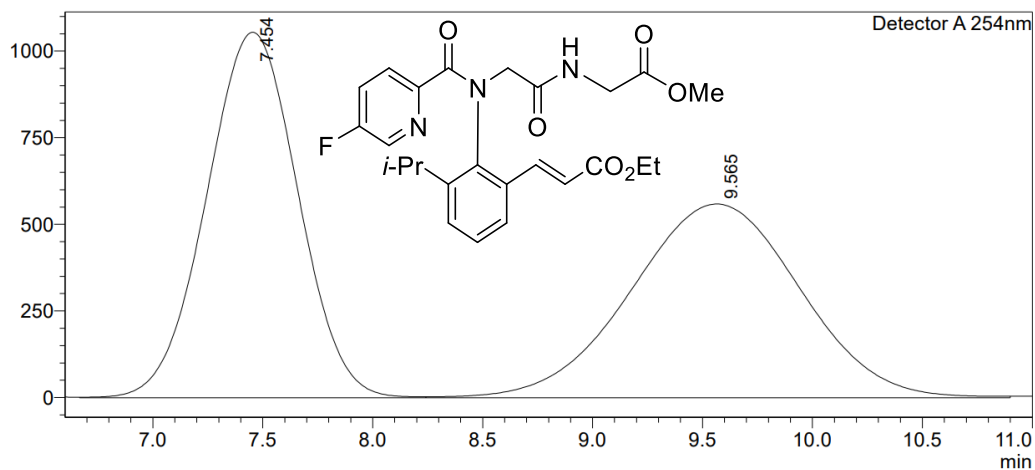

<Peak Table>

Detector A 254nm

| Peak# | Ret. Time | Area     | Height  | Conc.  | Unit | Mark | Name |
|-------|-----------|----------|---------|--------|------|------|------|
| 1     | 7.454     | 30525005 | 1054641 | 50.411 |      |      |      |
| 2     | 9.565     | 30027309 | 559249  | 49.589 |      | V    |      |
| Total |           | 60552313 | 1613889 |        |      |      |      |

3i: AD-H, Hexane/i-PrOH =50/50, rate = 1.0 mL/min, 254 nm

<Chromatogram>

mV

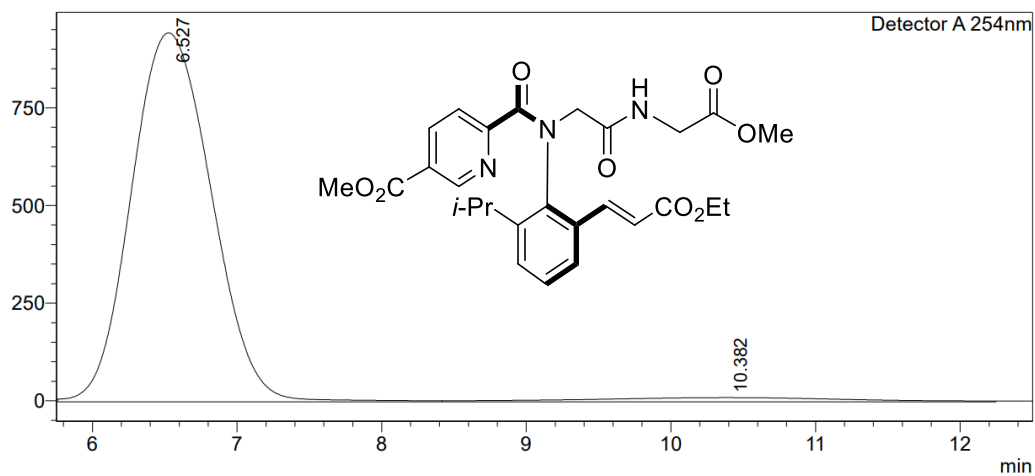

<Peak Table>

Detector A 254nm

| Peak# | Ret. Time | Area     | Height | Conc.  | Unit | Mark | Name |
|-------|-----------|----------|--------|--------|------|------|------|
| 1     | 6.527     | 36367106 | 944064 | 96.385 |      |      |      |
| 2     | 10.382    | 1363974  | 10455  | 3.615  |      | V    |      |
| Total |           | 37731080 | 954519 |        |      |      |      |

<Chromatogram>

mV

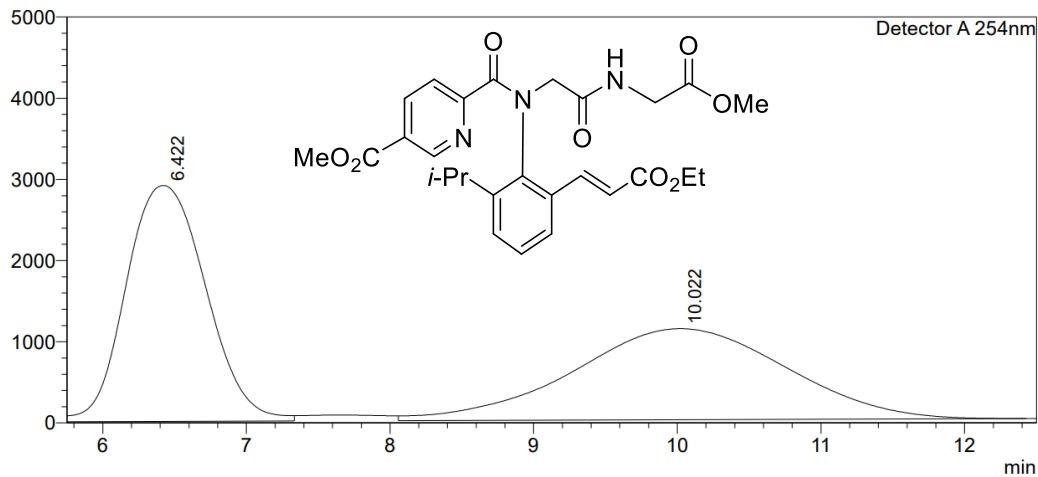

<Peak Table>

Detector A 254nm

| Peak# | Ret. Time | Area      | Height  | Conc.  | Unit | Mark | Name |
|-------|-----------|-----------|---------|--------|------|------|------|
| 1     | 6.422     | 113894715 | 2906773 | 49.532 |      |      |      |
| 2     | 10.022    | 116047865 | 1121199 | 50.468 |      |      |      |
| Total |           | 229942580 | 4027972 |        |      |      |      |

3j: AS-H, Hexane/i-PrOH = 60/40, rate = 1.0 mL/min, 254 nm

<Chromatogram>

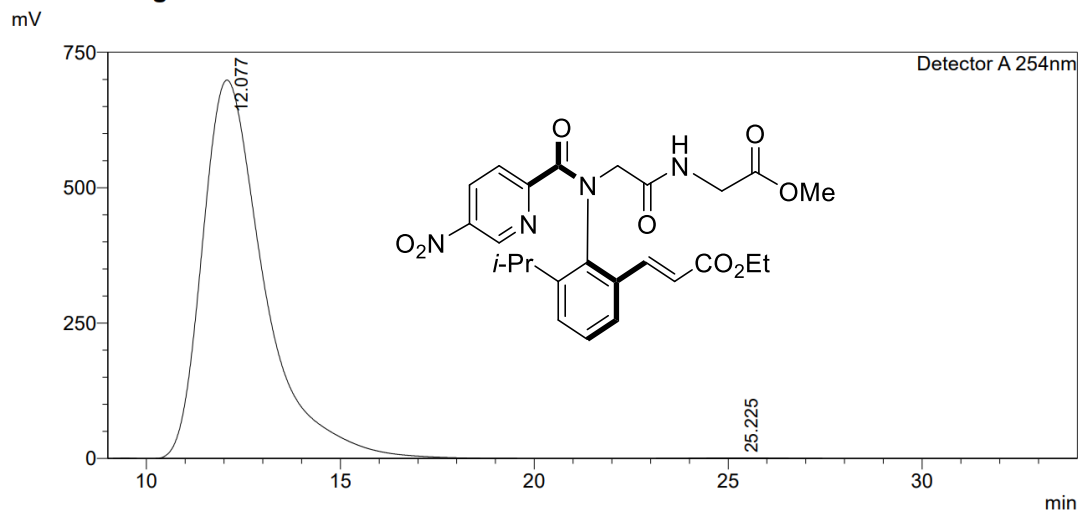

<Peak Table>

Detector A 254nm

| Peak# | Ret. Time | Area     | Height | Conc.  | Unit | Mark | Name |
|-------|-----------|----------|--------|--------|------|------|------|
| 1     | 12.077    | 78721814 | 700921 | 99.012 |      |      |      |
| 2     | 25.225    | 785833   | 3199   | 0.988  |      |      |      |
| Total |           | 79507647 | 704120 |        |      |      |      |

<Chromatogram>

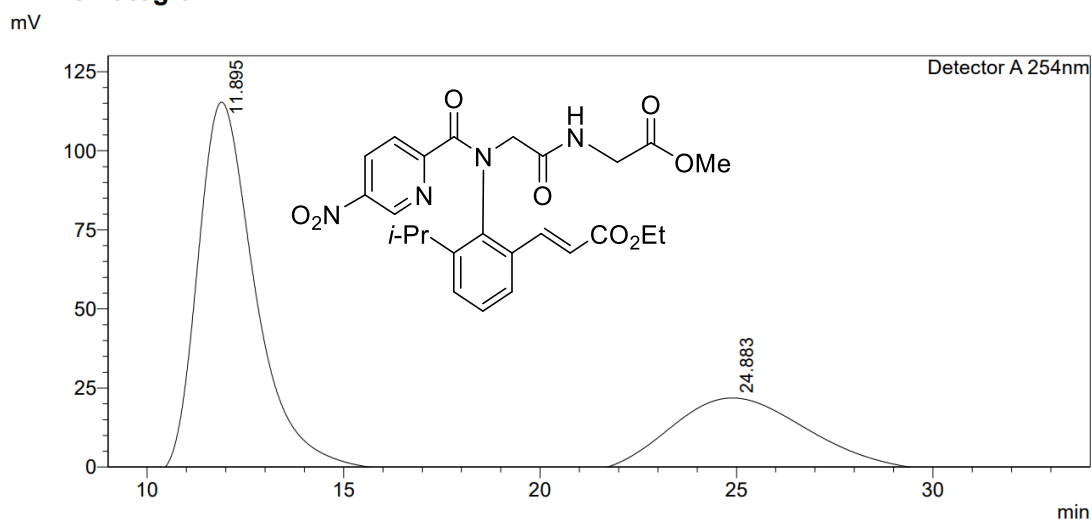

<Peak Table>

Detector A 254nm

| Peak# | Ret. Time | Area     | Height | Conc.  | Unit | Mark | Name |
|-------|-----------|----------|--------|--------|------|------|------|
| 1     | 11.895    | 12437811 | 117760 | 66.126 |      |      |      |
| 2     | 24.883    | 6371588  | 24142  | 33.874 |      |      |      |
| Total |           | 18809399 | 141902 |        |      |      |      |

3k: OD-H, Hexane/i-PrOH =50/50, rate = 1.0 mL/min, 254 nm

<Chromatogram>

mV

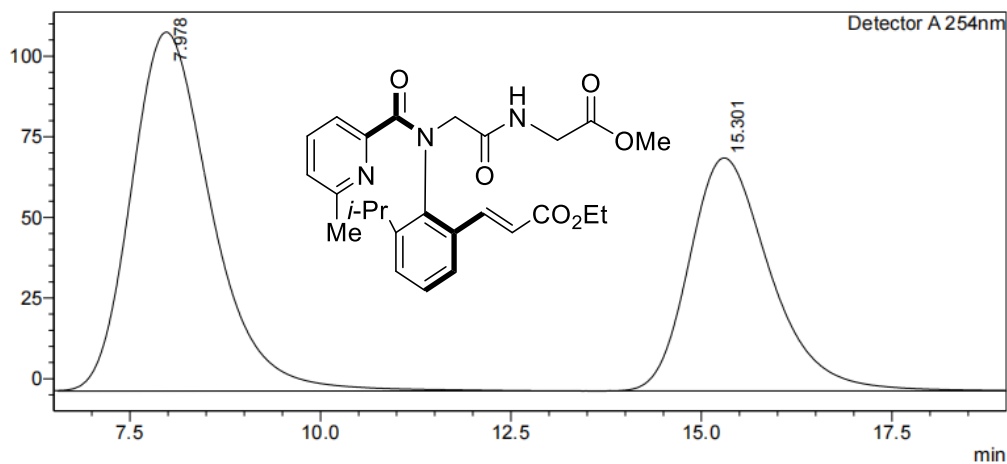

<Peak Table>

Detector A 254nm

| Peak# | Ret. Time | Area     | Height | Conc.  | Unit | Mark | Name |
|-------|-----------|----------|--------|--------|------|------|------|
| 1     | 7.978     | 8178884  | 111277 | 60.399 |      | S    |      |
| 2     | 15.301    | 5362641  | 72238  | 39.601 |      | S    |      |
| Total |           | 13541525 | 183515 |        |      |      |      |

<Chromatogram>

mV

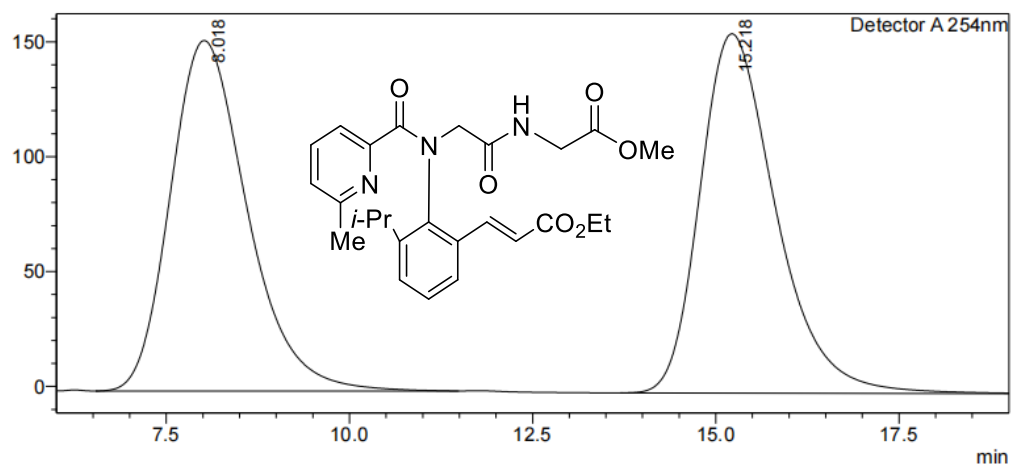

<Peak Table>

Detector A 254nm

| Peak# | Ret. Time | Area     | Height | Conc.  | Unit | Mark | Name |
|-------|-----------|----------|--------|--------|------|------|------|
| 1     | 8.018     | 11172428 | 152560 | 49.723 |      |      |      |
| 2     | 15.218    | 11296749 | 156385 | 50.277 |      |      |      |
| Total |           | 22469178 | 308945 |        |      |      |      |

3o: AD-H, Hexane/i-PrOH =50/50, rate = 1.0 mL/min, 254 nm

<Chromatogram>

mV

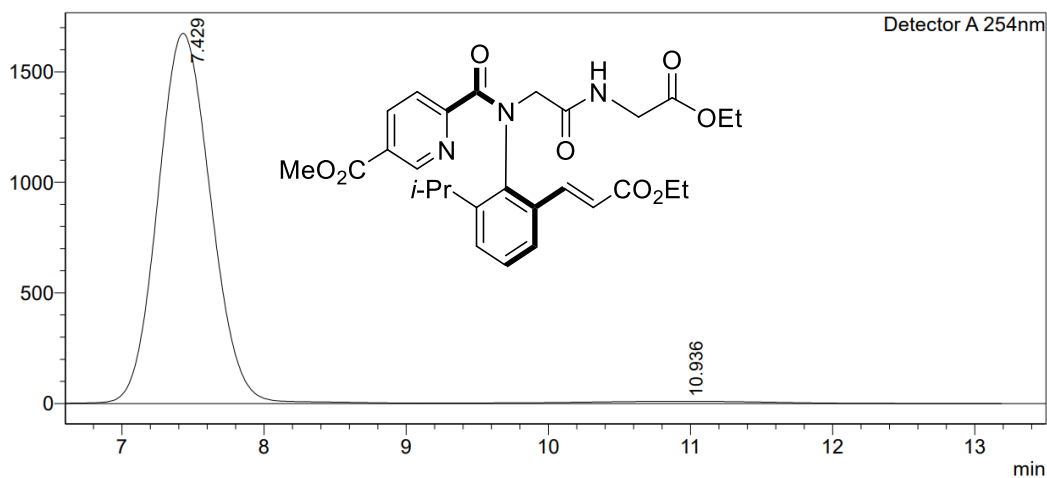

<Peak Table>

Detector A 254nm

| Peak# | Ret. Time | Area     | Height  | Conc.  | Unit | Mark | Name |
|-------|-----------|----------|---------|--------|------|------|------|
| 1     | 7.429     | 43536005 | 1673283 | 97.787 |      |      |      |
| 2     | 10.936    | 985367   | 9981    | 2.213  |      | V    |      |
| Total |           | 44521372 | 1683264 |        |      |      |      |

<Chromatogram>

mV

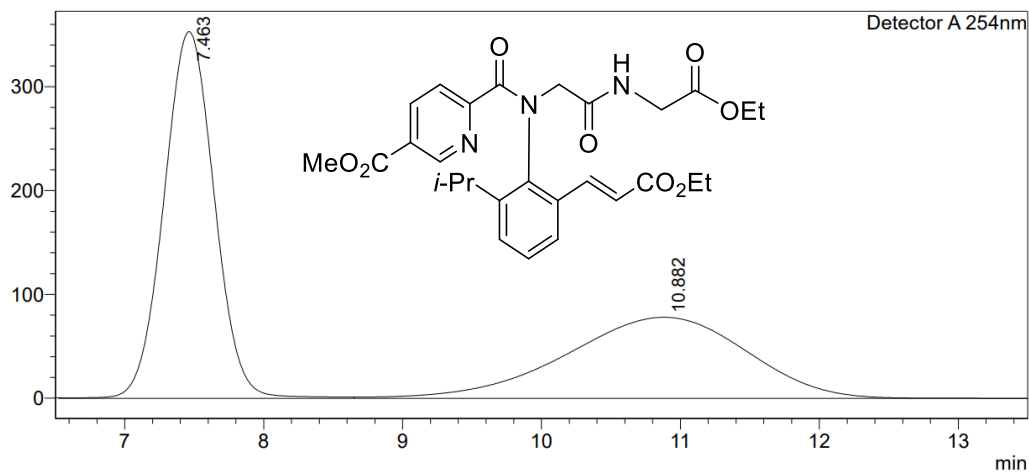

<Peak Table>

Detector A 254nm

| Peak# | Ret. Time | Area     | Height | Conc.  | Unit | Mark | Name |
|-------|-----------|----------|--------|--------|------|------|------|
| 1     | 7.463     | 8920890  | 353079 | 55.758 |      |      |      |
| 2     | 10.882    | 7078421  | 78036  | 44.242 |      | V    |      |
| Total |           | 15999311 | 431115 |        |      |      |      |



3p: AD-H, Hexane/i-PrOH =80/20, rate = 1.0 mL/min, 254 nm

<Chromatogram>

mV

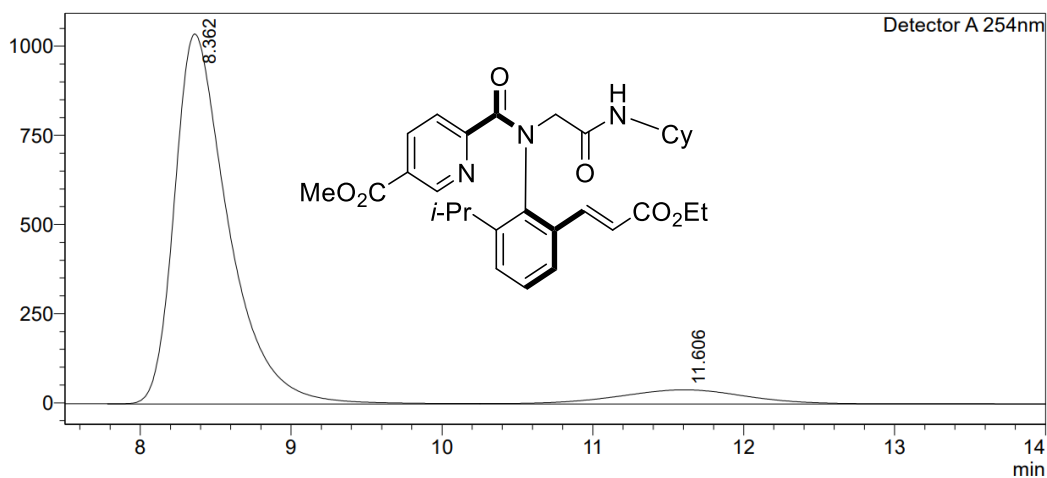

<Peak Table>

Detector A 254nm

| Peak# | Ret. Time | Area     | Height  | Conc.  | Unit | Mark | Name |
|-------|-----------|----------|---------|--------|------|------|------|
| 1     | 8.362     | 25926268 | 1037920 | 91.327 |      |      |      |
| 2     | 11.606    | 2462179  | 39936   | 8.673  |      | V    |      |
| Total |           | 28388447 | 1077856 |        |      |      |      |

<Chromatogram>

mV

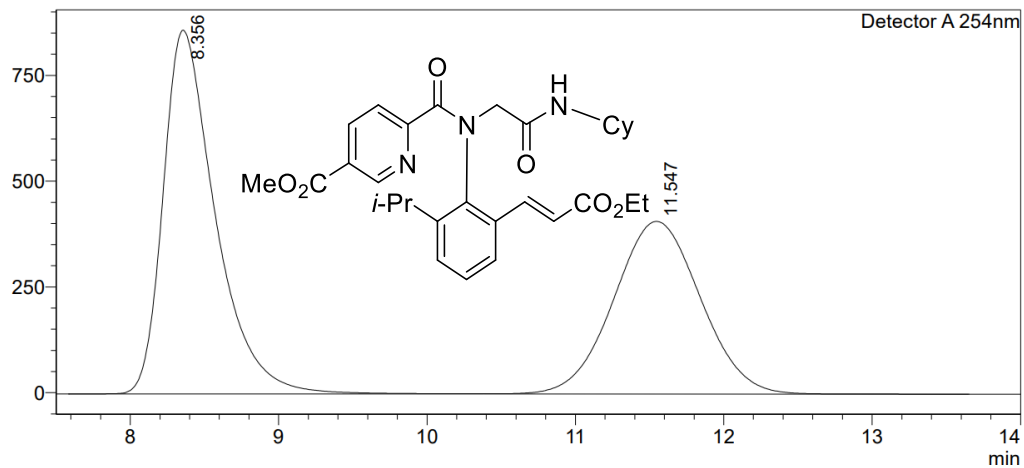

<Peak Table>

Detector A 254nm

| Peak# | Ret. Time | Area     | Height  | Conc.  | Unit | Mark | Name |
|-------|-----------|----------|---------|--------|------|------|------|
| 1     | 8.356     | 21077246 | 859986  | 55.874 |      |      |      |
| 2     | 11.547    | 16645603 | 408171  | 44.126 |      | V    |      |
| Total |           | 37722850 | 1268157 |        |      |      |      |

3q: AD-H, Hexane/i-PrOH = 80/20, rate =0.8 mL/min, 254 nm

<Chromatogram>

mV

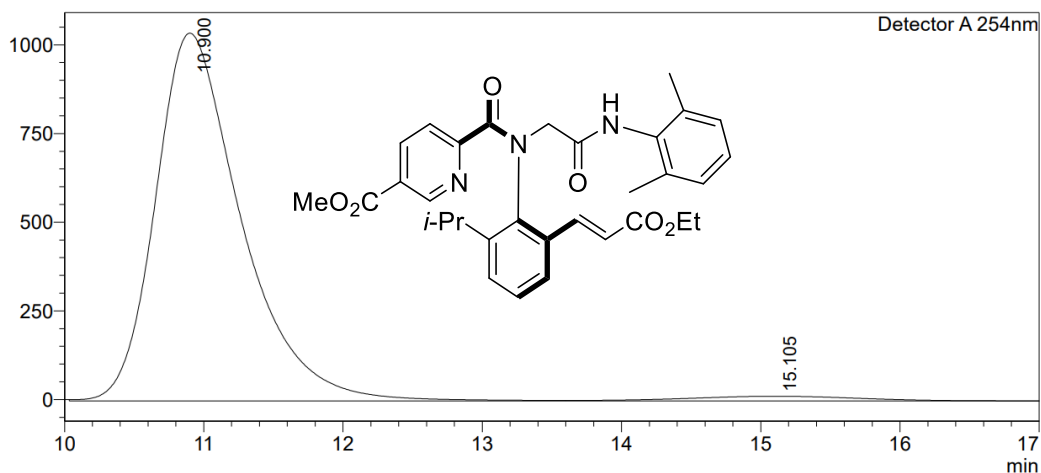

<Peak Table>

Detector A 254nm

| Peak# | Ret. Time | Area     | Height  | Conc.  | Unit | Mark | Name |
|-------|-----------|----------|---------|--------|------|------|------|
| 1     | 10.900    | 44463553 | 1036891 | 97.538 |      |      |      |
| 2     | 15.105    | 1122194  | 13141   | 2.462  |      | V    |      |
| Total |           | 45585747 | 1050032 |        |      |      |      |

<Chromatogram>

mV

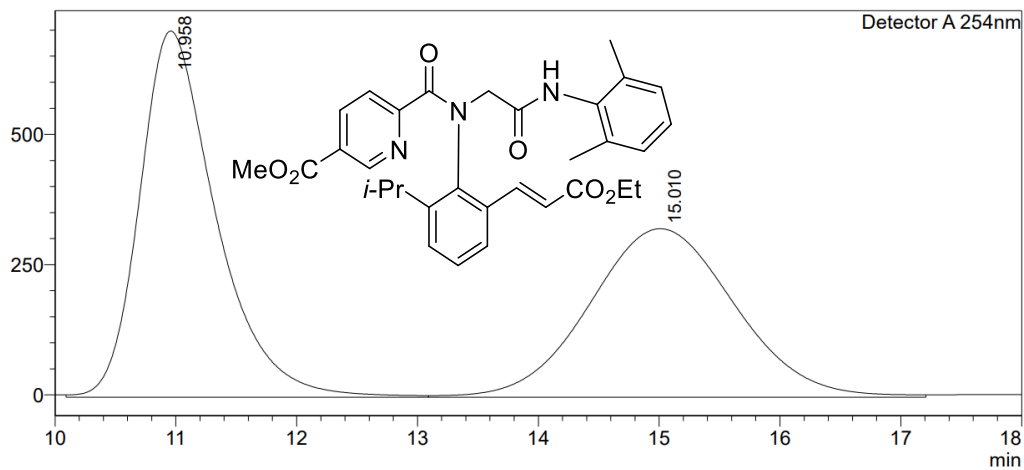

<Peak Table>

Detector A 254nm

| Peak# | Ret. Time | Area     | Height  | Conc.  | Unit | Mark | Name |
|-------|-----------|----------|---------|--------|------|------|------|
| 1     | 10.958    | 31007674 | 702700  | 53.317 |      |      |      |
| 2     | 15.010    | 27149199 | 323363  | 46.683 |      | V    |      |
| Total |           | 58156873 | 1026063 |        |      |      |      |

3r: IE, Hexane/i-PrOH =50/50, rate = 1.0 mL/min, 254 nm

<Chromatogram>

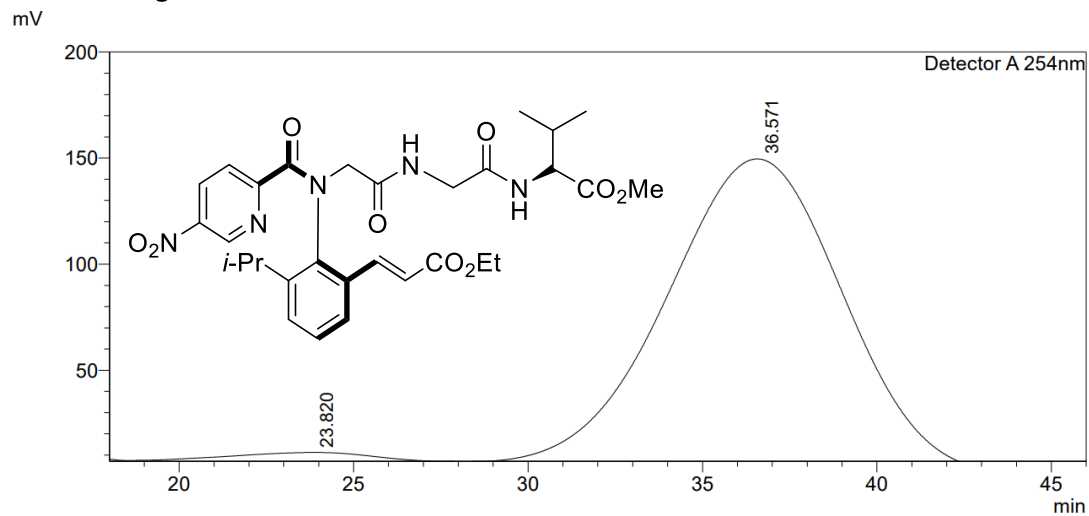

<Peak Table>

Detector A 254nm

| Peak# | Ret. Time | Area     | Height | Conc.  | Unit | Mark | Name |
|-------|-----------|----------|--------|--------|------|------|------|
| 1     | 23.820    | 2428993  | 6171   | 4.553  |      |      |      |
| 2     | 36.571    | 50923729 | 145463 | 95.447 |      |      |      |
| Total |           | 53352722 | 151634 |        |      |      |      |

<Chromatogram>

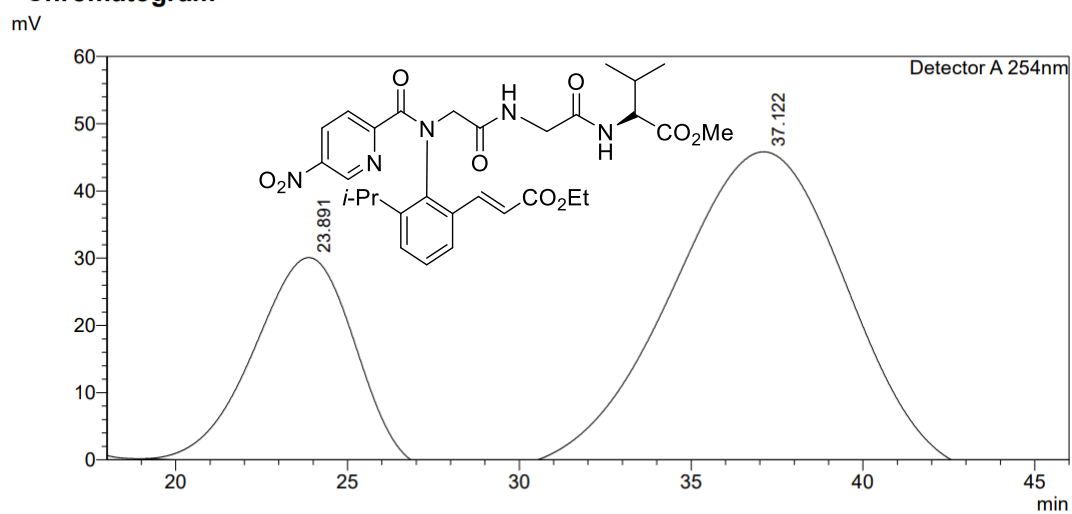

<Peak Table>

Detector A 254nm

| Peak# | Ret. Time | Area     | Height | Conc.  | Unit | Mark | Name |
|-------|-----------|----------|--------|--------|------|------|------|
| 1     | 23.891    | 6339477  | 30890  | 26.641 |      |      |      |
| 2     | 37.122    | 17456044 | 48033  | 73.359 |      | M    |      |
| Total |           | 23795521 | 78923  |        |      |      |      |

3s: IE, Hexane/i-PrOH =70/30, rate = 1.0 mL/min, 254 nm

<Chromatogram>

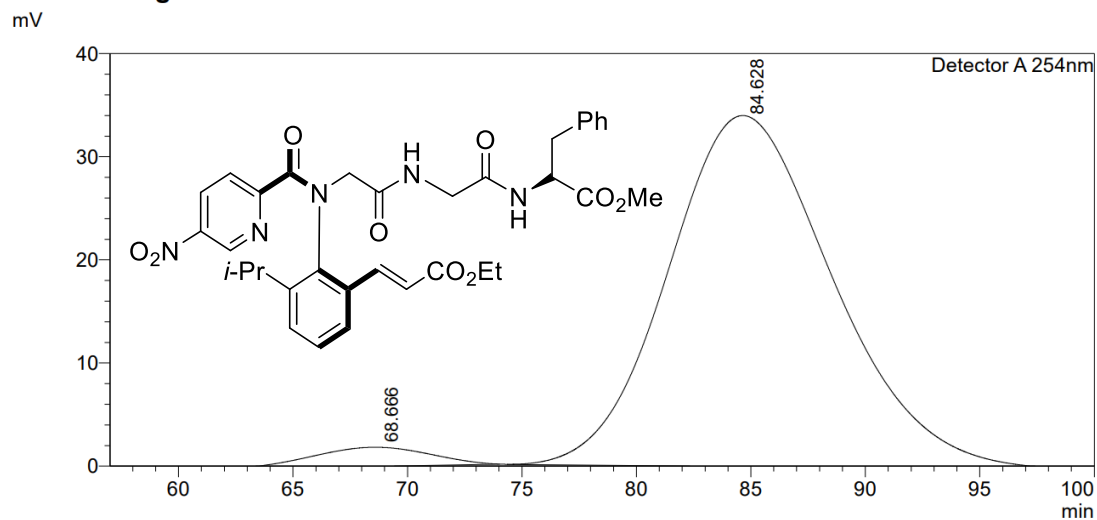

<Peak Table>

Detector A 254nm

| Peak# | Ret. Time | Area     | Height | Conc.  | Unit | Mark | Name |
|-------|-----------|----------|--------|--------|------|------|------|
| 1     | 68.666    | 673614   | 1866   | 3.802  |      | M    |      |
| 2     | 84.628    | 17041993 | 34032  | 96.198 |      | M    |      |
| Total |           | 17715607 | 35898  |        |      |      |      |

<Chromatogram>

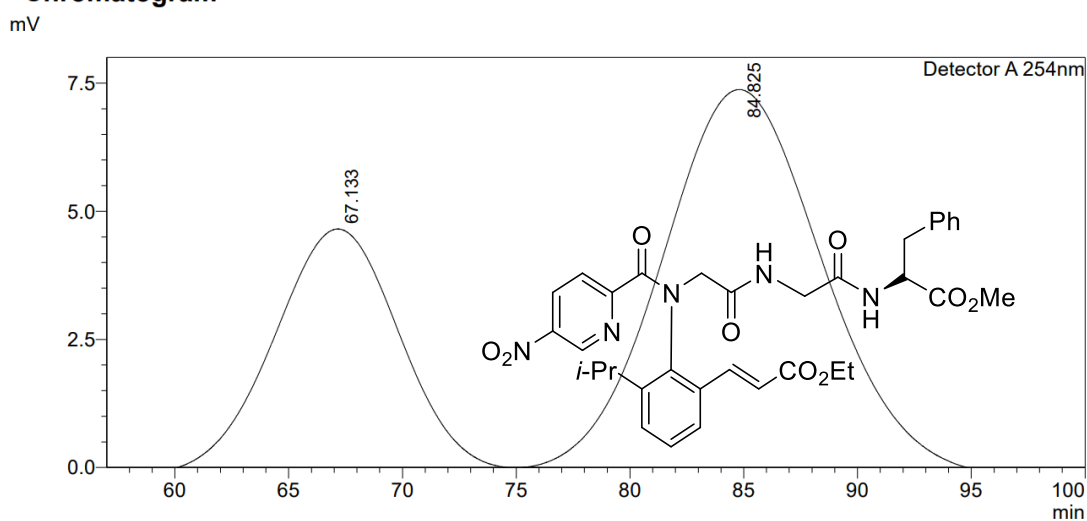

<Peak Table>

Detector A 254nm

| Peak# | Ret. Time | Area    | Height | Conc.  | Unit | Mark | Name |
|-------|-----------|---------|--------|--------|------|------|------|
| 1     | 67.133    | 1805781 | 4723   | 33.037 |      | M    |      |
| 2     | 84.825    | 3660160 | 7460   | 66.963 |      | M    |      |
| Total |           | 5465941 | 12183  |        |      |      |      |

3t: AS-H, Hexane/i-PrOH = 60/40, rate = 1.0 mL/min, 254 nm

<Chromatogram>

mV

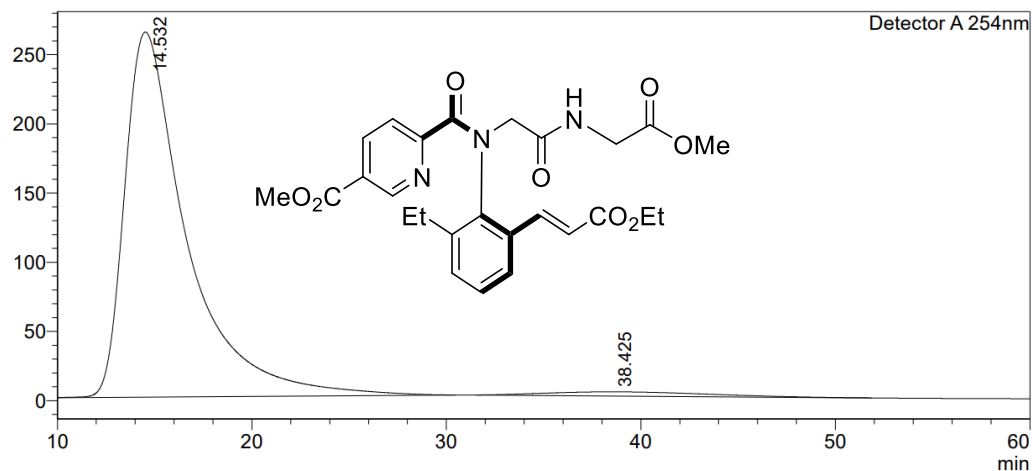

<Peak Table>

Detector A 254nm

| Peak# | Ret. Time | Area     | Height | Conc.  | Unit | Mark | Name |
|-------|-----------|----------|--------|--------|------|------|------|
| 1     | 14.532    | 58636607 | 263763 | 97.040 |      |      |      |
| 2     | 38.425    | 1788729  | 3013   | 2.960  |      | M    |      |
| Total |           | 60425335 | 266776 |        |      |      |      |

<Chromatogram>

mV

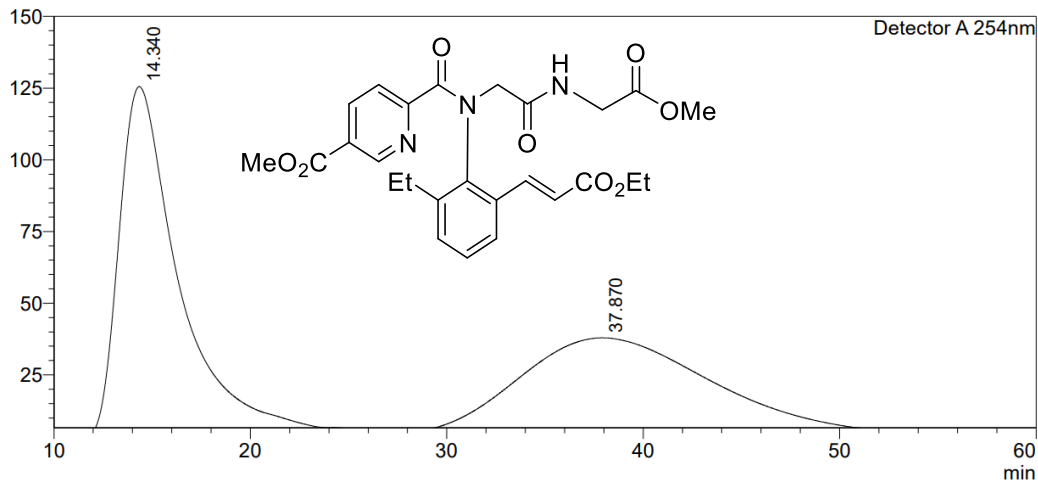

<Peak Table>

Detector A 254nm

| Peak# | Ret. Time | Area     | Height | Conc.  | Unit | Mark | Name |
|-------|-----------|----------|--------|--------|------|------|------|
| 1     | 14.340    | 25425353 | 121959 | 51.902 |      |      |      |
| 2     | 37.870    | 23561661 | 33679  | 48.098 |      | M    |      |
| Total |           | 48987014 | 155638 |        |      |      |      |

3u: AD-H, Hexane/i-PrOH = 50/50, rate = 1.0 mL/min, 254 nm

<Chromatogram>

mV

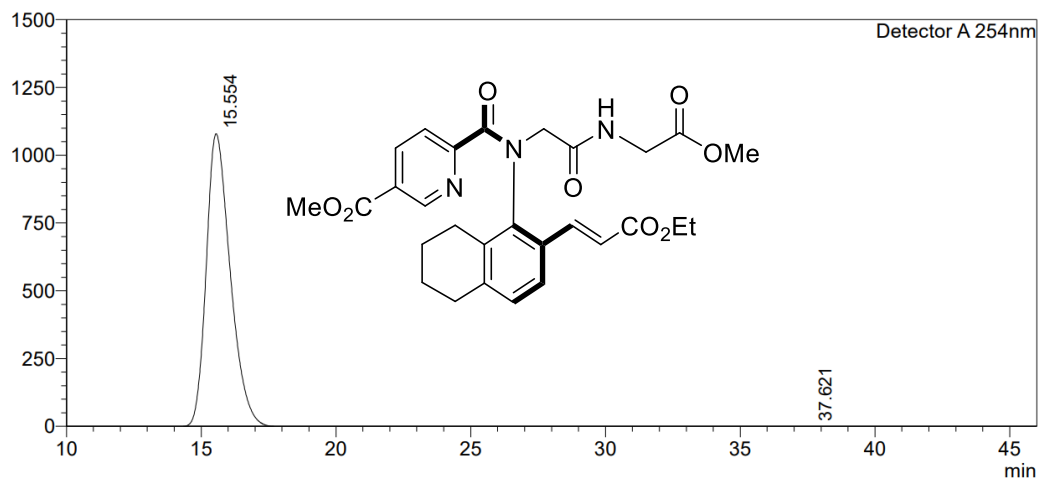

<Peak Table>

Detector A 254nm

| Peak# | Ret. Time | Area     | Height  | Conc.  | Unit | Mark | Name |
|-------|-----------|----------|---------|--------|------|------|------|
| 1     | 15.554    | 68358932 | 1085210 | 99.760 |      |      |      |
| 2     | 37.621    | 164646   | 2431    | 0.240  |      | M    |      |
| Total |           | 68523578 | 1087641 |        |      |      |      |

<Chromatogram>

mV

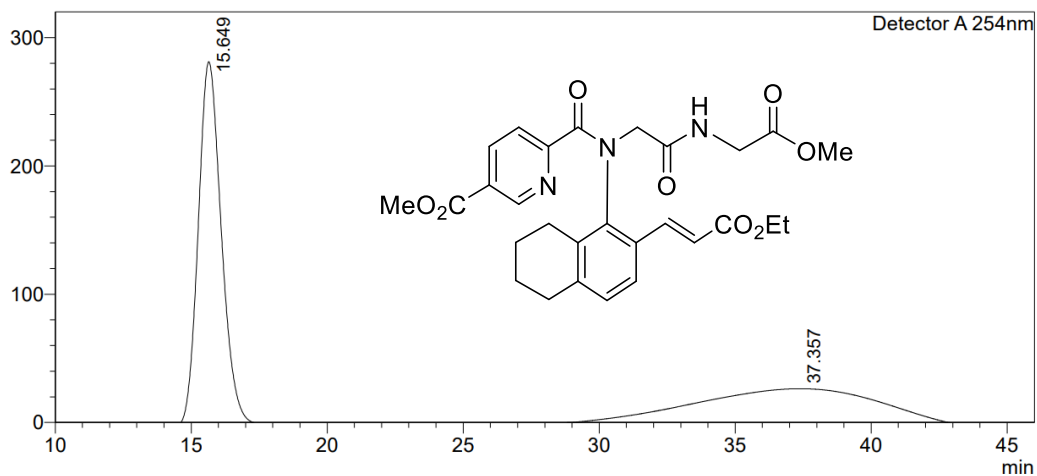

<Peak Table>

Detector A 254nm

| Peak# | Ret. Time | Area     | Height | Conc.  | Unit | Mark | Name |
|-------|-----------|----------|--------|--------|------|------|------|
| 1     | 15.649    | 17424163 | 285751 | 51.553 |      |      |      |
| 2     | 37.357    | 16374404 | 30921  | 48.447 |      | M    |      |
| Total |           | 33798566 | 316672 |        |      |      |      |

3v: OD-H, Hexane/i-PrOH =50/50, rate = 1.0 mL/min, 254 nm

<Chromatogram>

mV

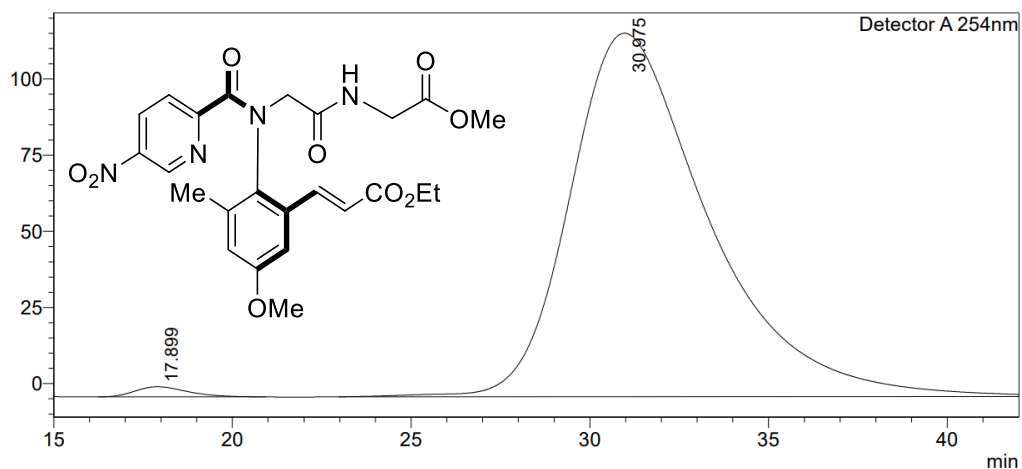

<Peak Table>

Detector A 254nm

| Peak# | Ret. Time | Area     | Height | Conc.  | Unit | Mark | Name |
|-------|-----------|----------|--------|--------|------|------|------|
| 1     | 17.899    | 342933   | 3340   | 1.048  |      |      |      |
| 2     | 30.975    | 32376453 | 119386 | 98.952 |      |      |      |
| Total |           | 32719387 | 122726 |        |      |      |      |

<Chromatogram>

mV

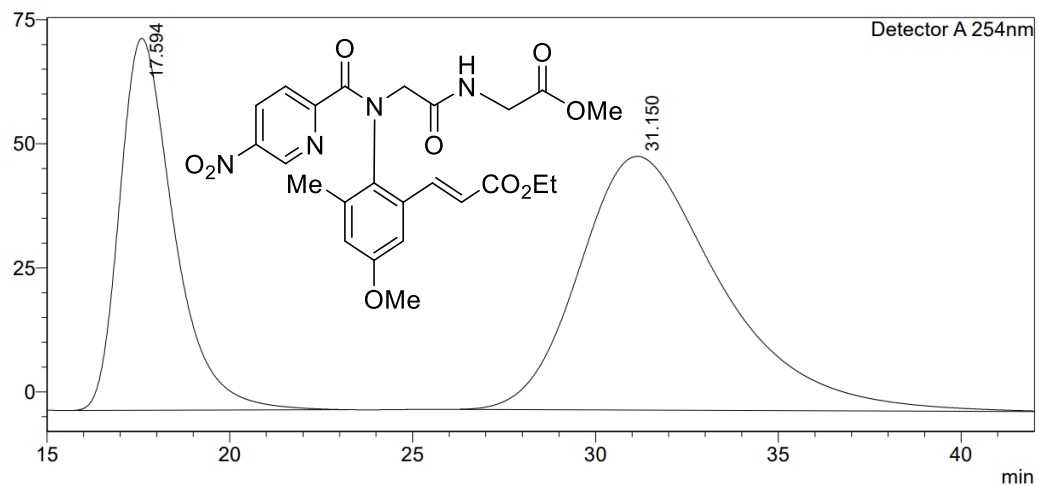

<Peak Table>

Detector A 254nm

| Peak# | Ret. Time | Area     | Height | Conc.  | Unit | Mark | Name |
|-------|-----------|----------|--------|--------|------|------|------|
| 1     | 17.594    | 7731401  | 74917  | 35.908 |      |      |      |
| 2     | 31.150    | 13799745 | 51087  | 64.092 |      |      |      |
| Total |           | 21531146 | 126004 |        |      |      |      |

4b: AD-H, Hexane/i-PrOH =80/20, rate = 1.0 mL/min, 254 nm

<Chromatogram>

mV

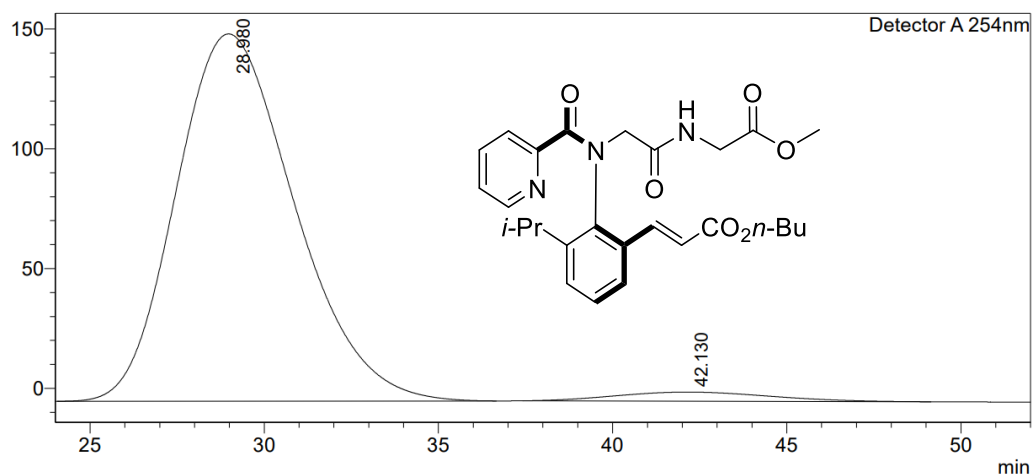

<Peak Table>

Detector A 254nm

| Peak# | Ret. Time | Area     | Height | Conc.  | Unit | Mark | Name |
|-------|-----------|----------|--------|--------|------|------|------|
| 1     | 28.980    | 36175558 | 153306 | 96.867 |      |      |      |
| 2     | 42.130    | 1169965  | 3817   | 3.133  |      | M    |      |
| Total |           | 37345523 | 157123 |        |      |      |      |

<Chromatogram>

mV

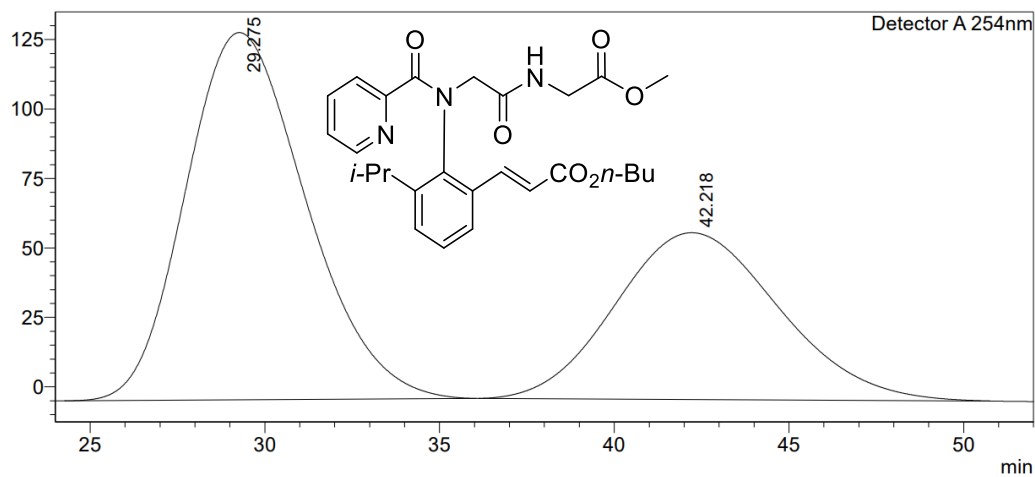

<Peak Table>

Detector A 254nm

| Peak# | Ret. Time | Area     | Height | Conc.  | Unit | Mark | Name |
|-------|-----------|----------|--------|--------|------|------|------|
| 1     | 29.275    | 31652165 | 132206 | 61.781 |      |      |      |
| 2     | 42.218    | 19580700 | 60029  | 38.219 |      | M    |      |
| Total |           | 51232864 | 192236 |        |      |      |      |



4c: AD-H, Hexane/i-PrOH = 70/30, rate = 1.0 mL/min, 254 nm

<Chromatogram>

mV

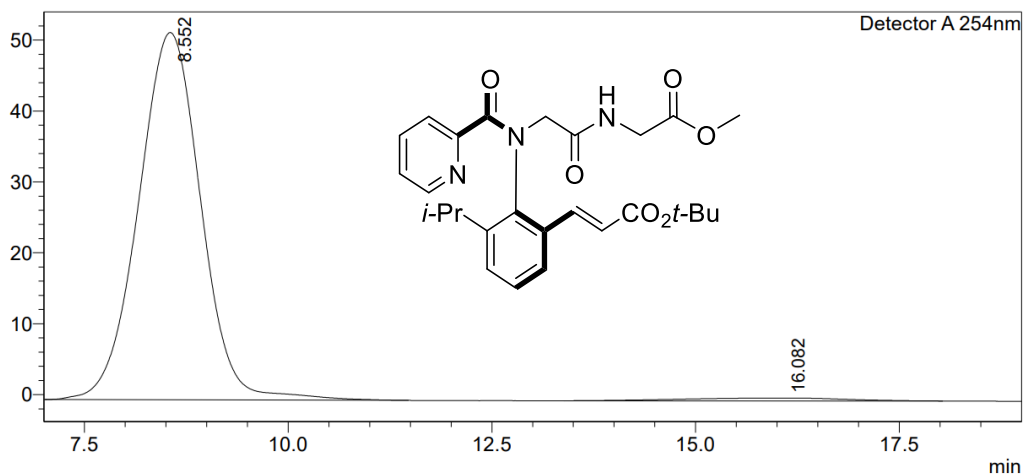

<Peak Table>

Detector A 254nm

| Peak# | Ret. Time | Area    | Height | Conc.  | Unit | Mark | Name |
|-------|-----------|---------|--------|--------|------|------|------|
| 1     | 8.552     | 2756081 | 51787  | 98.015 |      |      |      |
| 2     | 16.082    | 55806   | 394    | 1.985  |      | M    |      |
| Total |           | 2811887 | 52181  |        |      |      |      |

<Chromatogram>

mV

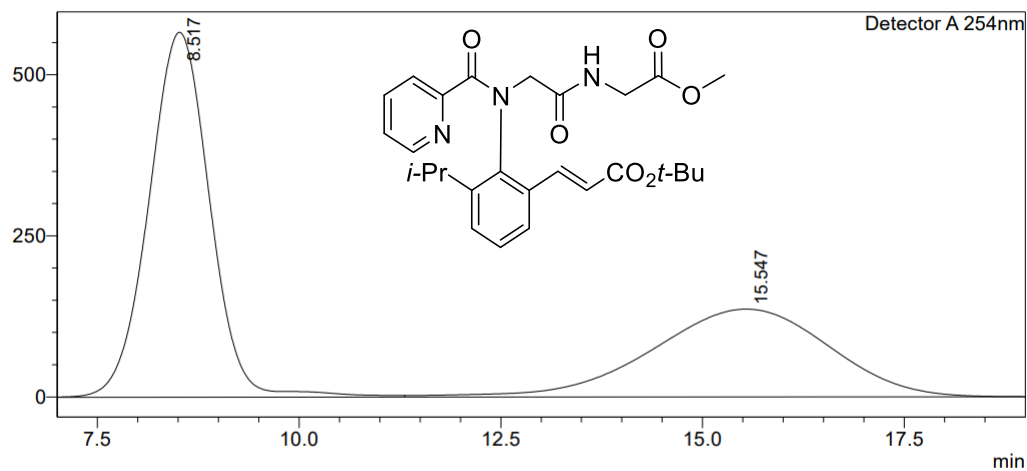

<Peak Table>

Detector A 254nm

| Peak# | Ret. Time | Area     | Height | Conc.  | Unit | Mark | Name |
|-------|-----------|----------|--------|--------|------|------|------|
| 1     | 8.517     | 29797794 | 566287 | 58.742 |      |      |      |
| 2     | 15.547    | 20928339 | 136212 | 41.258 |      | V    |      |
| Total |           | 50726133 | 702499 |        |      |      |      |

4d: AD-H, Hexane/i-PrOH = 50/50, rate = 1.0 mL/min, 254 nm

<Chromatogram>

mV

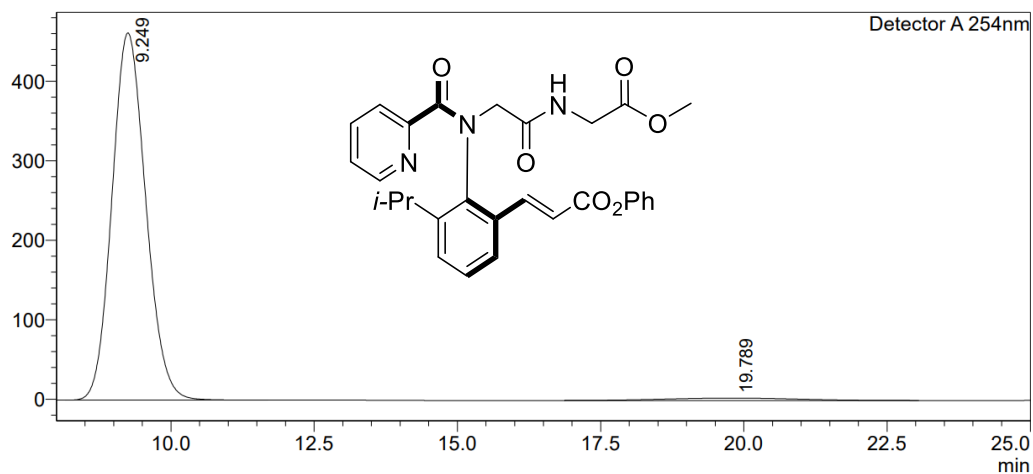

<Peak Table>

Detector A 254nm

| Peak# | Ret. Time | Area     | Height | Conc.  | Unit | Mark | Name |
|-------|-----------|----------|--------|--------|------|------|------|
| 1     | 9.249     | 18955857 | 461931 | 97.505 |      |      |      |
| 2     | 19.789    | 485005   | 3058   | 2.495  |      |      |      |
| Total |           | 19440863 | 464989 |        |      |      |      |

<Chromatogram>

mV

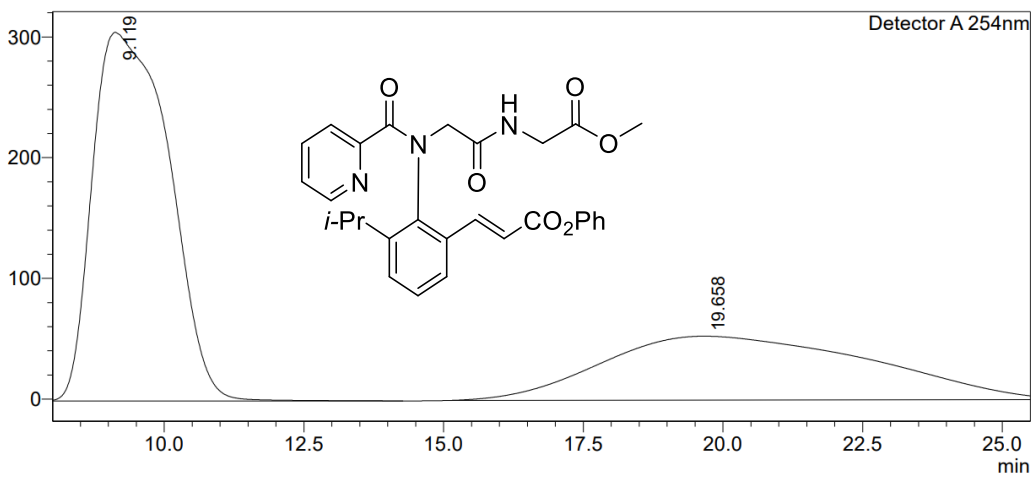

<Peak Table>

Detector A 254nm

| Peak# | Ret. Time | Area     | Height | Conc.  | Unit | Mark | Name |
|-------|-----------|----------|--------|--------|------|------|------|
| 1     | 9.119     | 29144161 | 305332 | 62.064 |      |      |      |
| 2     | 19.658    | 17814174 | 53111  | 37.936 |      | M    |      |
| Total |           | 46958335 | 358443 |        |      |      |      |

4e: AD-H, Hexane/i-PrOH = 50/50, rate = 1.0 mL/min, 254 nm

<Chromatogram>

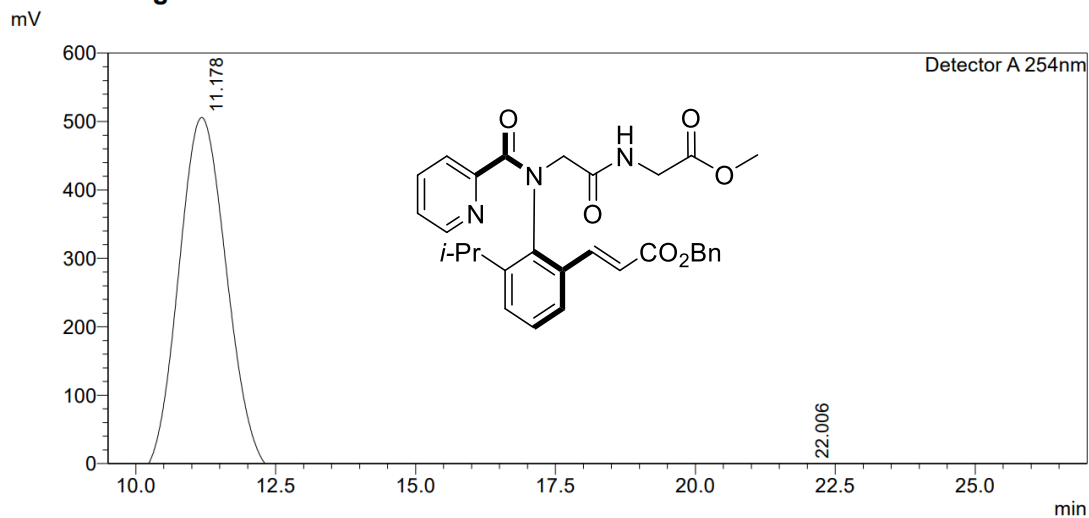

<Peak Table>

Detector A 254nm

| Peak# | Ret. Time | Area     | Height | Conc.  | Unit | Mark | Name |
|-------|-----------|----------|--------|--------|------|------|------|
| 1     | 11.178    | 32510275 | 528491 | 97.581 |      |      |      |
| 2     | 22.006    | 805799   | 4453   | 2.419  |      |      |      |
| Total |           | 33316074 | 532944 |        |      |      |      |

<Chromatogram>

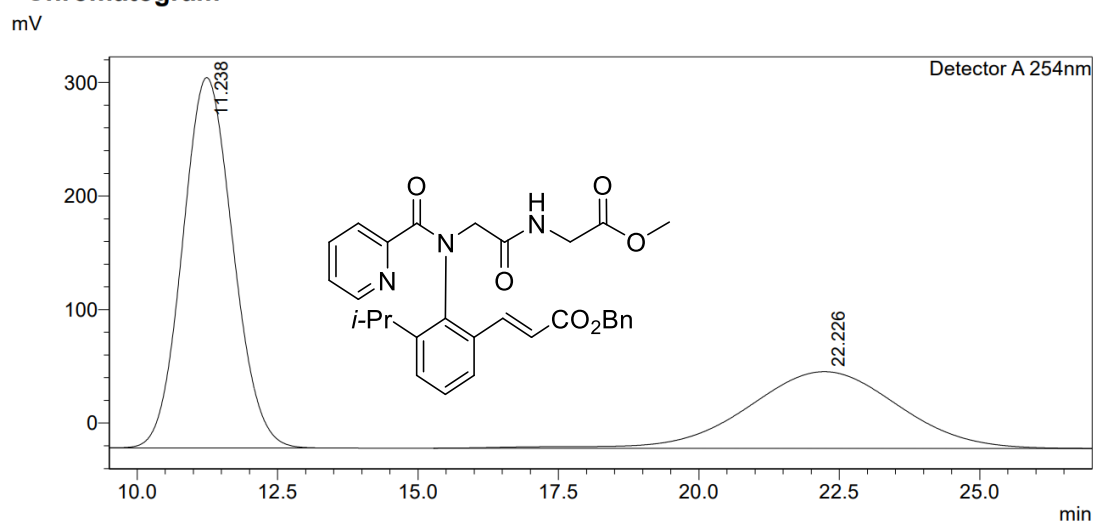

<Peak Table>

Detector A 254nm

| Peak# | Ret. Time | Area     | Height | Conc.  | Unit | Mark | Name |
|-------|-----------|----------|--------|--------|------|------|------|
| 1     | 11.238    | 20388644 | 326291 | 61.647 |      |      |      |
| 2     | 22.226    | 12684556 | 67541  | 38.353 |      |      |      |
| Total |           | 33073200 | 393832 |        |      |      |      |

4f: AD-H, Hexane/i-PrOH = 50/50, rate = 1.0 mL/min, 254 nm

<Chromatogram>

mV

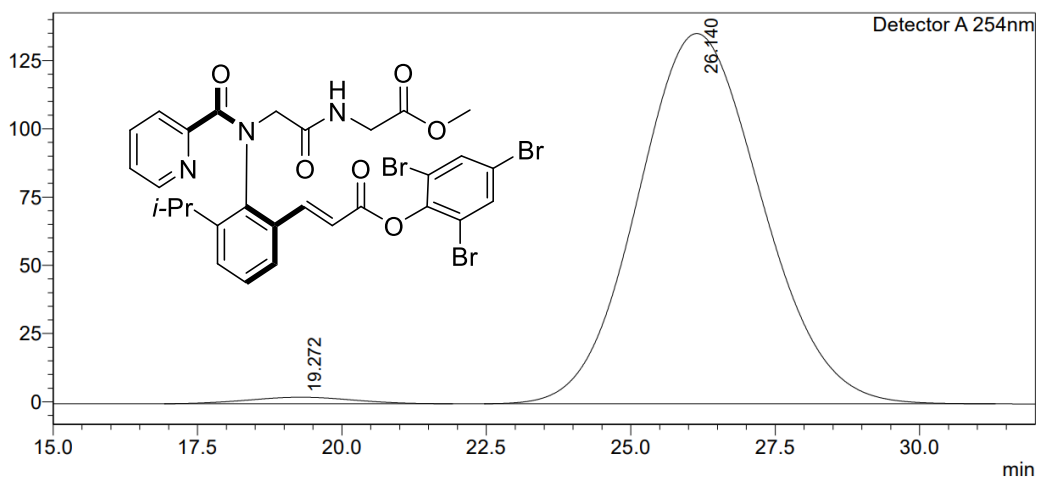

<Peak Table>

Detector A 254nm

| Peak# | Ret. Time | Area     | Height | Conc.  | Unit | Mark | Name |
|-------|-----------|----------|--------|--------|------|------|------|
| 1     | 19.272    | 302611   | 2384   | 1.469  |      |      |      |
| 2     | 26.140    | 20292534 | 135579 | 98.531 |      |      |      |
| Total |           | 20595145 | 137963 |        |      |      |      |

<Chromatogram>

mV

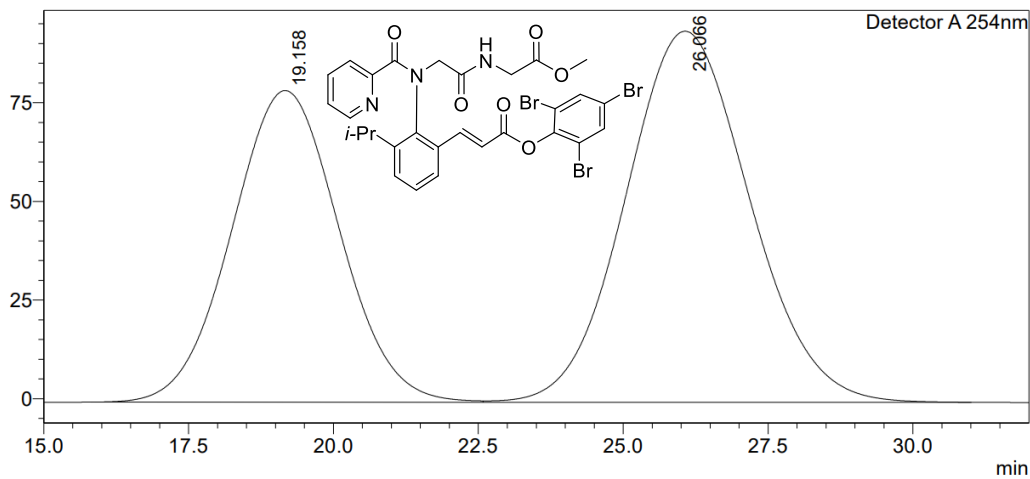

<Peak Table>

Detector A 254nm

| Peak# | Ret. Time | Area     | Height | Conc.  | Unit | Mark | Name |
|-------|-----------|----------|--------|--------|------|------|------|
| 1     | 19.158    | 10205942 | 78931  | 42.178 |      |      |      |
| 2     | 26.066    | 13991287 | 94021  | 57.822 |      | V    |      |
| Total |           | 24197229 | 172952 |        |      |      |      |

4g: AD-H, Hexane/i-PrOH = 50/50, rate = 1.0 mL/min, 254 nm

<Chromatogram>

mV

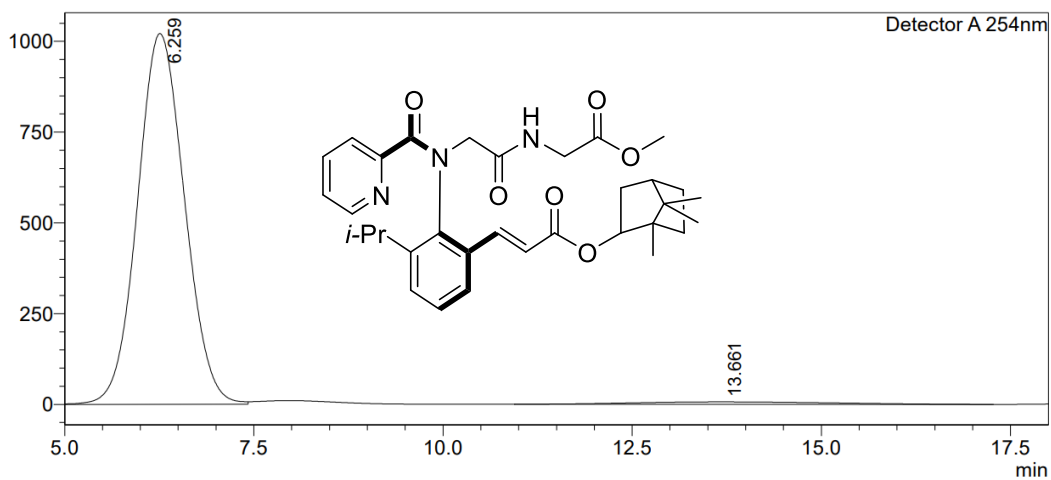

<Peak Table>

Detector A 254nm

| Peak# | Ret. Time | Area     | Height  | Conc.  | Unit | Mark | Name |
|-------|-----------|----------|---------|--------|------|------|------|
| 1     | 6.259     | 44194073 | 1021710 | 97.329 |      |      |      |
| 2     | 13.661    | 1212990  | 6641    | 2.671  |      |      |      |
| Total |           | 45407063 | 1028351 |        |      |      |      |

<Chromatogram>

mV

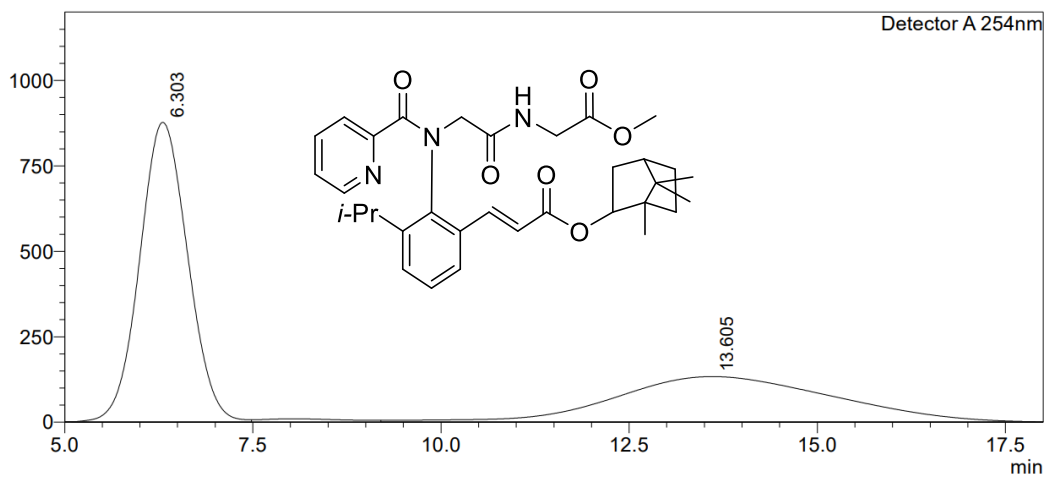

<Peak Table>

Detector A 254nm

| Peak# | Ret. Time | Area     | Height  | Conc.  | Unit | Mark | Name |
|-------|-----------|----------|---------|--------|------|------|------|
| 1     | 6.303     | 39160841 | 878044  | 58.871 |      |      |      |
| 2     | 13.605    | 27358993 | 133750  | 41.129 |      |      |      |
| Total |           | 66519834 | 1011794 |        |      |      |      |

4h: IA, Hexane/i-PrOH = 50/50, rate = 1.0 mL/min, 254 nm

<Chromatogram>

mV

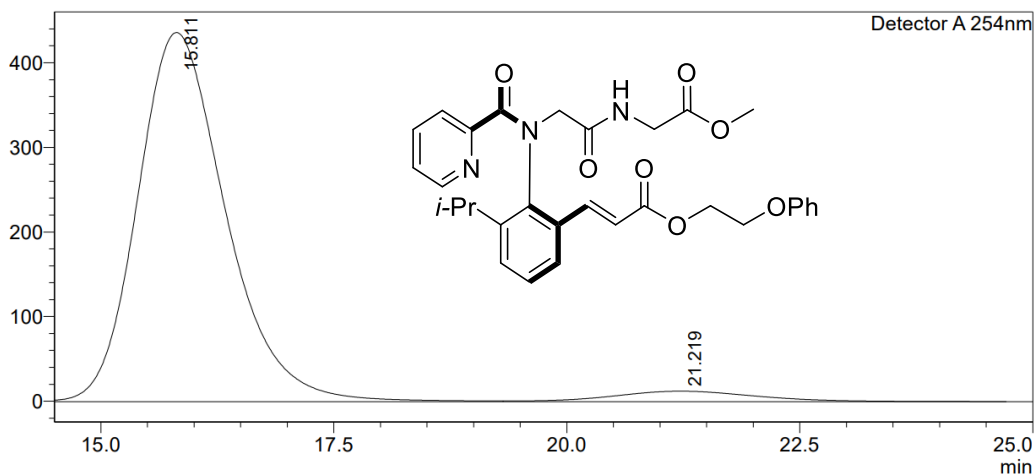

<Peak Table>

Detector A 254nm

| Peak# | Ret. Time | Area     | Height | Conc.  | Unit | Mark | Name |
|-------|-----------|----------|--------|--------|------|------|------|
| 1     | 15.811    | 28692014 | 436205 | 95.627 |      |      |      |
| 2     | 21.219    | 1312129  | 12320  | 4.373  |      | V    |      |
| Total |           | 30004143 | 448526 |        |      |      |      |

<Chromatogram>

mV

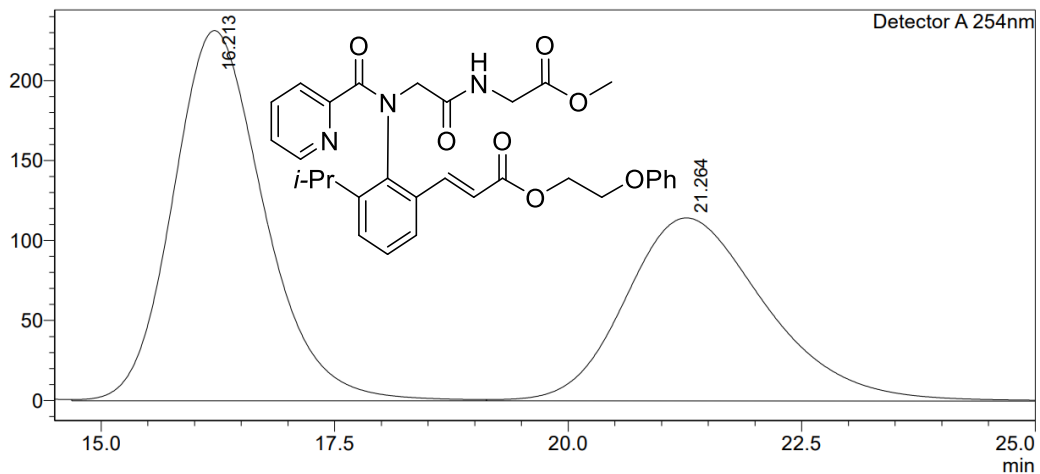

<Peak Table>

Detector A 254nm

| Peak# | Ret. Time | Area     | Height | Conc.  | Unit | Mark | Name |
|-------|-----------|----------|--------|--------|------|------|------|
| 1     | 16.213    | 15790268 | 231494 | 56.723 |      |      |      |
| 2     | 21.264    | 12046993 | 114419 | 43.277 |      | V    |      |
| Total |           | 27837261 | 345913 |        |      |      |      |

4i: AD-H, Hexane/i-PrOH =80/20, rate = 1.0 mL/min, 254 nm

<Chromatogram>

mV

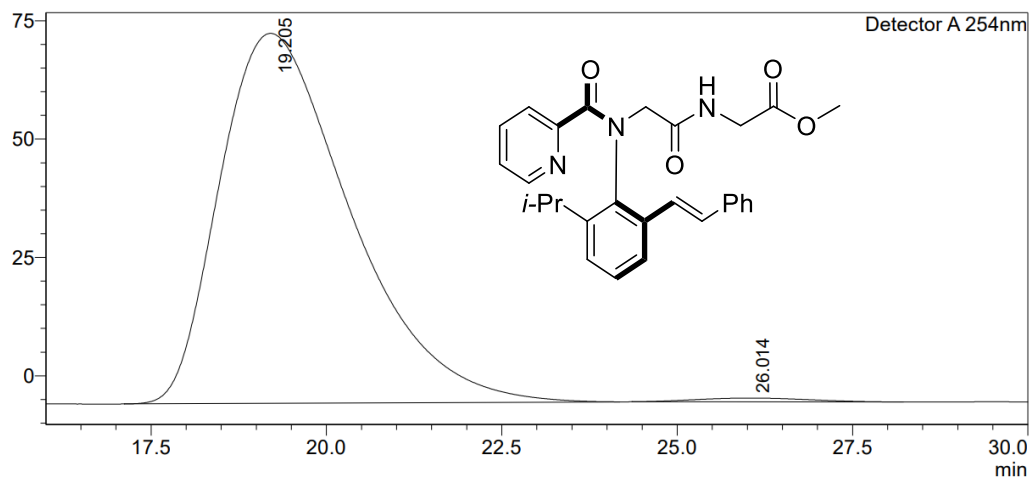

<Peak Table>

Detector A 254nm

| Peak# | Ret. Time | Area     | Height | Conc.  | Unit | Mark | Name |
|-------|-----------|----------|--------|--------|------|------|------|
| 1     | 19.205    | 10129060 | 78159  | 99.114 |      |      |      |
| 2     | 26.014    | 90521    | 810    | 0.886  |      |      |      |
| Total |           | 10219580 | 78968  |        |      |      |      |

<Chromatogram>

mV

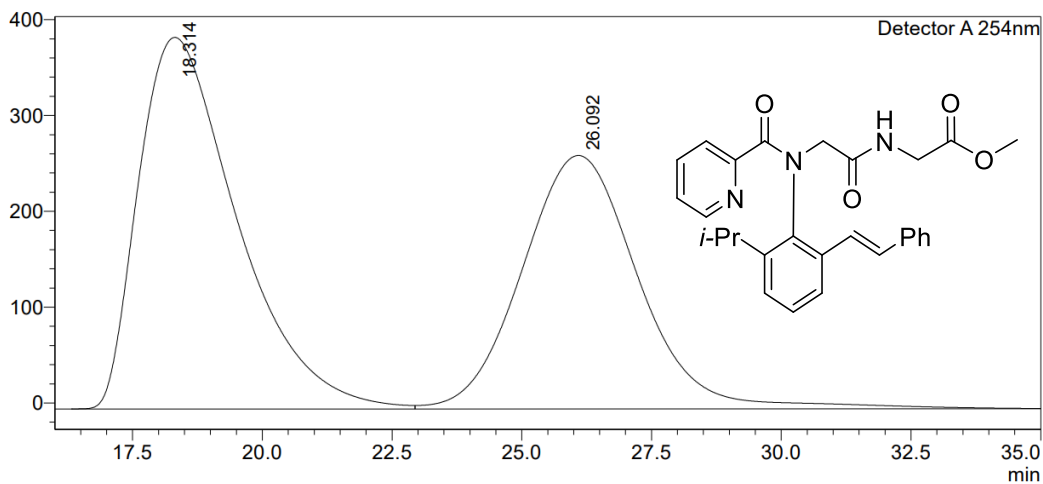

<Peak Table>

Detector A 254nm

| Peak# | Ret. Time | Area     | Height | Conc.  | Unit | Mark | Name |
|-------|-----------|----------|--------|--------|------|------|------|
| 1     | 18.314    | 51212867 | 387625 | 55.292 |      |      |      |
| 2     | 26.092    | 41409974 | 264365 | 44.708 |      | V    |      |
| Total |           | 92622841 | 651990 |        |      |      |      |

4j: AD-H, Hexane/i-PrOH = 50/50, rate = 1.0 mL/min, 254 nm

<Chromatogram>

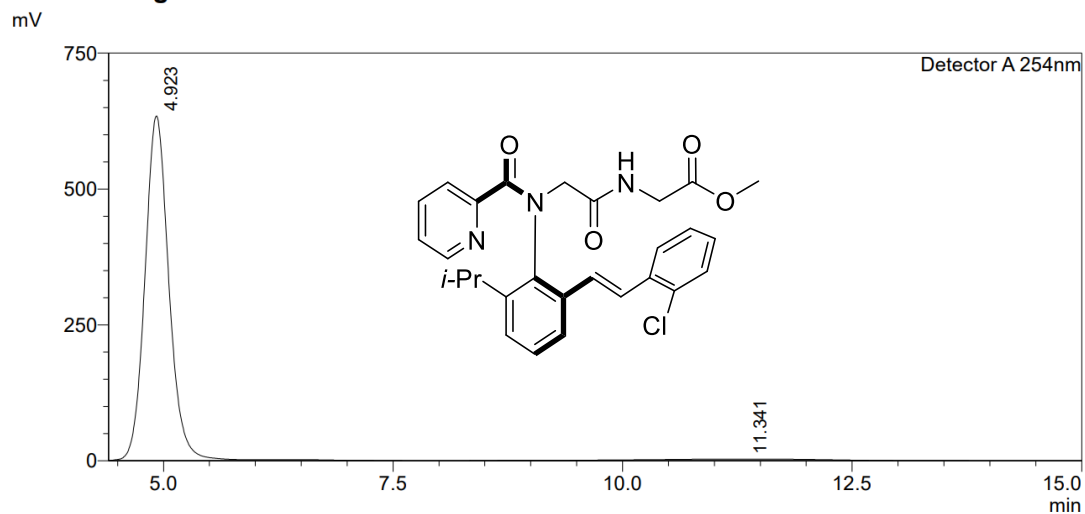

<Peak Table>

Detector A 254nm

| Peak# | Ret. Time | Area     | Height | Conc.  | Unit | Mark | Name |
|-------|-----------|----------|--------|--------|------|------|------|
| 1     | 4.923     | 11643967 | 634197 | 96.206 |      |      |      |
| 2     | 11.341    | 459202   | 3244   | 3.794  |      |      |      |
| Total |           | 12103169 | 637441 |        |      |      |      |

<Chromatogram>

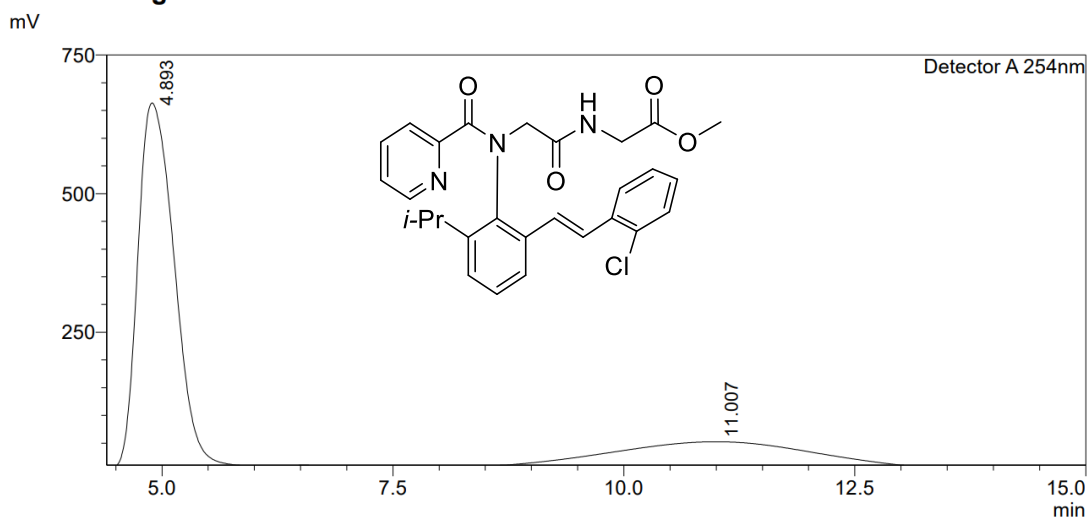

<Peak Table>

Detector A 254nm

| Peak# | Ret. Time | Area     | Height | Conc.  | Unit | Mark | Name |
|-------|-----------|----------|--------|--------|------|------|------|
| 1     | 4.893     | 18190732 | 660194 | 67.060 |      | M    |      |
| 2     | 11.007    | 8935149  | 52028  | 32.940 |      |      |      |
| Total |           | 27125881 | 712222 |        |      |      |      |



4k: AD-H, Hexane/i-PrOH = 50/50, rate = 1.0 mL/min, 254 nm

<Chromatogram>

mV

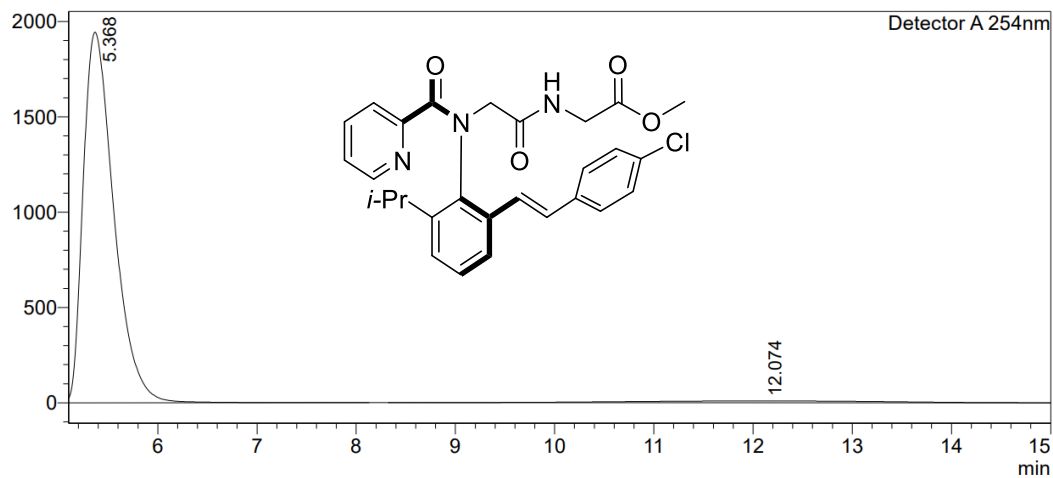

<Peak Table>

Detector A 254nm

| Peak# | Ret. Time | Area     | Height  | Conc.  | Unit | Mark | Name |
|-------|-----------|----------|---------|--------|------|------|------|
| 1     | 5.368     | 41764813 | 1943470 | 96.086 |      |      |      |
| 2     | 12.074    | 1701359  | 9261    | 3.914  |      |      |      |
| Total |           | 43466172 | 1952732 |        |      |      |      |

<Chromatogram>

mV

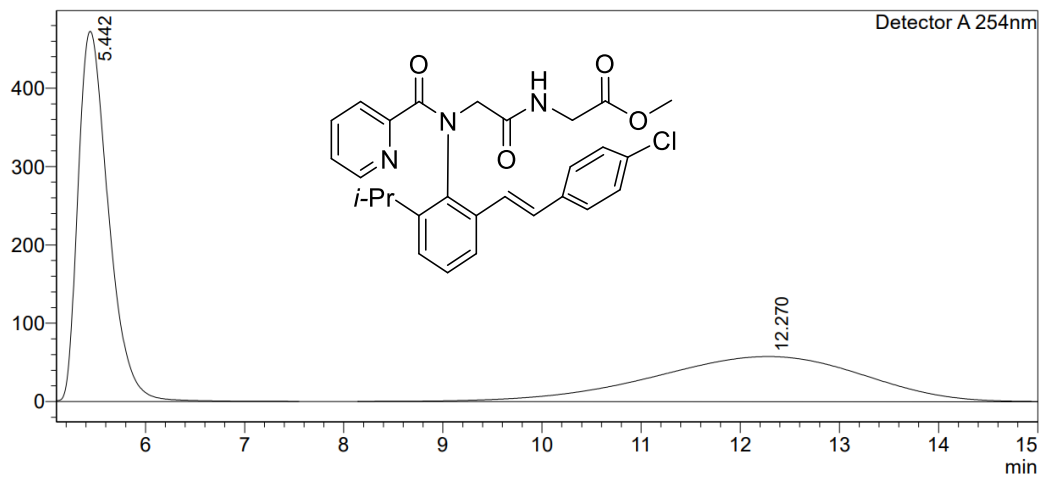

<Peak Table>

Detector A 254nm

| Peak# | Ret. Time | Area     | Height | Conc.  | Unit | Mark | Name |
|-------|-----------|----------|--------|--------|------|------|------|
| 1     | 5.442     | 10059379 | 472539 | 54.116 |      |      |      |
| 2     | 12.270    | 8529197  | 57447  | 45.884 |      |      |      |
| Total |           | 18588576 | 529986 |        |      |      |      |

4I: AD-H, Hexane/i-PrOH = 50/50, rate = 1.0 mL/min, 254 nm

<Chromatogram>

mV

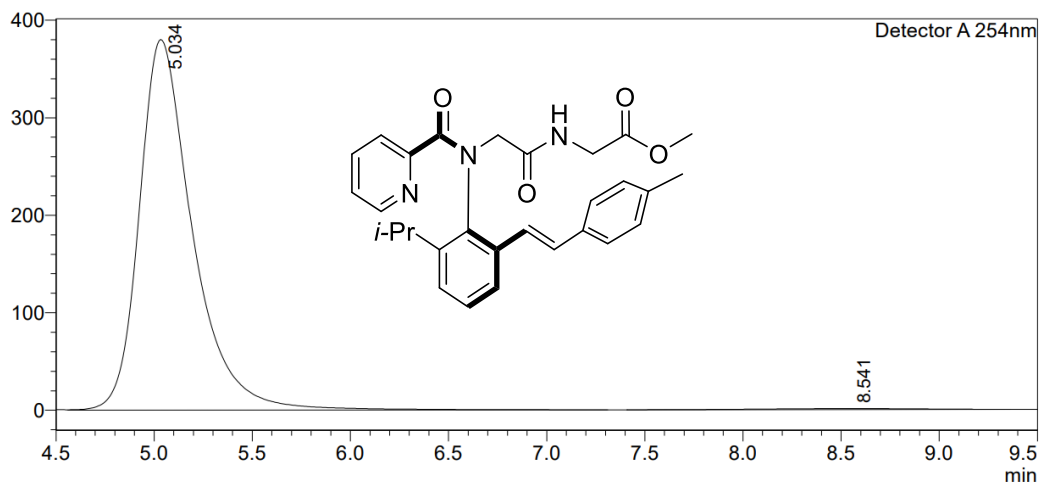

<Peak Table>

Detector A 254nm

| Peak# | Ret. Time | Area    | Height | Conc.  | Unit | Mark | Name |
|-------|-----------|---------|--------|--------|------|------|------|
| 1     | 5.034     | 7185118 | 380067 | 99.260 |      |      |      |
| 2     | 8.541     | 53561   | 966    | 0.740  |      |      |      |
| Total |           | 7238679 | 381033 |        |      |      |      |

<Chromatogram>

mV

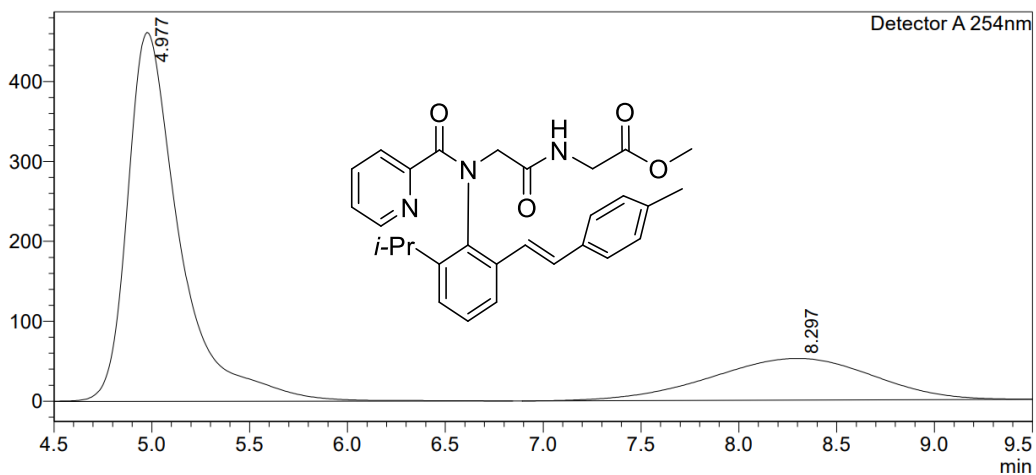

<Peak Table>

Detector A 254nm

| Peak# | Ret. Time | Area     | Height | Conc.  | Unit | Mark | Name |
|-------|-----------|----------|--------|--------|------|------|------|
| 1     | 4.977     | 8566129  | 461898 | 73.862 |      | S    |      |
| 2     | 8.297     | 3031309  | 52155  | 26.138 |      |      |      |
| Total |           | 11597438 | 514053 |        |      |      |      |

4m: AD-H, Hexane/i-PrOH = 50/50, rate = 1.0 mL/min, 254 nm

<Chromatogram>

mV

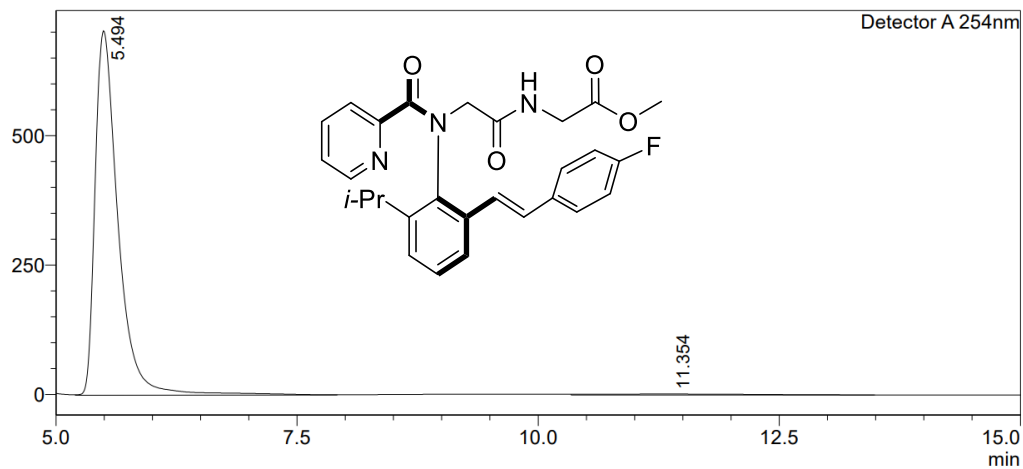

<Peak Table>

Detector A 254nm

| Peak# | Ret. Time | Area     | Height | Conc.  | Unit | Mark | Name |
|-------|-----------|----------|--------|--------|------|------|------|
| 1     | 5.494     | 11703248 | 703457 | 98.237 |      |      |      |
| 2     | 11.354    | 210060   | 1815   | 1.763  |      |      |      |
| Total |           | 11913308 | 705272 |        |      |      |      |

<Chromatogram>

mV

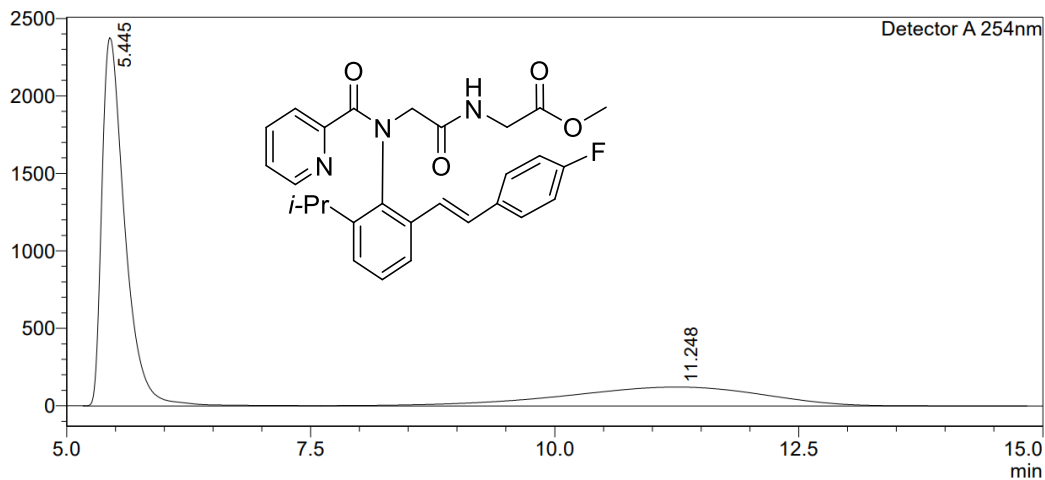

<Peak Table>

Detector A 254nm

| Peak# | Ret. Time | Area     | Height  | Conc.  | Unit | Mark | Name |
|-------|-----------|----------|---------|--------|------|------|------|
| 1     | 5.445     | 38710158 | 2375928 | 69.055 |      |      |      |
| 2     | 11.248    | 17346603 | 121654  | 30.945 |      | V    |      |
| Total |           | 56056760 | 2497582 |        |      |      |      |

4n: AD-H, Hexane/i-PrOH = 70/30, rate = 1.0 mL/min, 254 nm

<Chromatogram>

mV

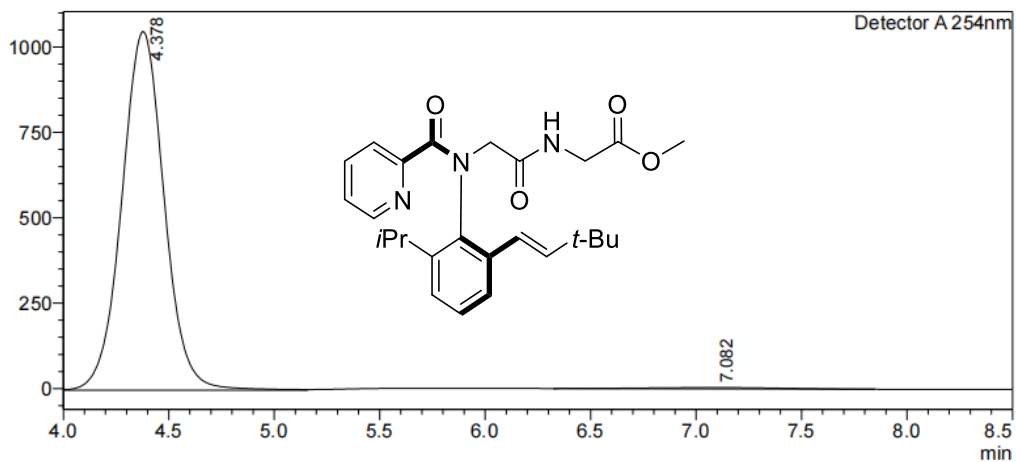

<Peak Table>

Detector A 254nm

| Peak# | Ret. Time | Area     | Height  | Conc.  | Unit | Mark | Name |
|-------|-----------|----------|---------|--------|------|------|------|
| 1     | 4.378     | 14691527 | 1049748 | 98.863 |      |      |      |
| 2     | 7.082     | 168943   | 3792    | 1.137  |      | M    |      |
| Total |           | 14860470 | 1053540 |        |      |      |      |

<Chromatogram>

mV

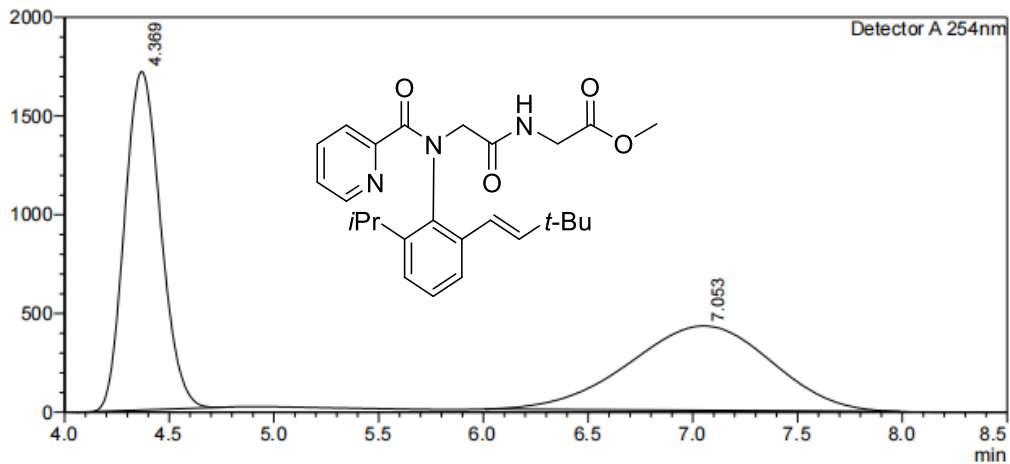

<Peak Table>

Detector A 254nm

| Peak# | Ret. Time | Area     | Height  | Conc.  | Unit | Mark | Name |
|-------|-----------|----------|---------|--------|------|------|------|
| 1     | 4.369     | 20512248 | 1714849 | 50.210 |      | M    |      |
| 2     | 7.053     | 20340919 | 427368  | 49.790 |      | M    |      |
| Total |           | 40853167 | 2142217 |        |      |      |      |

4o: AD-H, Hexane/i-PrOH = 70/30, rate = 1.0 mL/min, 254 nm

<Chromatogram>

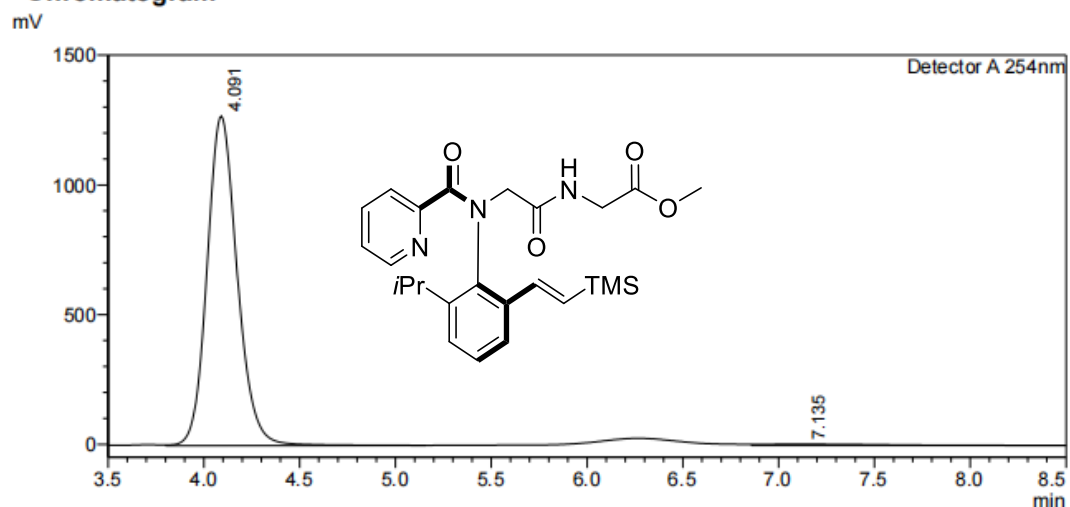

<Peak Table>

Detector A 254nm

| Peak# | Ret. Time | Area     | Height  | Conc.  | Unit | Mark | Name |
|-------|-----------|----------|---------|--------|------|------|------|
| 1     | 4.091     | 13970394 | 1270390 | 98.127 |      |      |      |
| 2     | 7.135     | 266702   | 5076    | 1.873  |      |      |      |
| Total |           | 14237095 | 1275466 |        |      |      |      |

<Chromatogram>

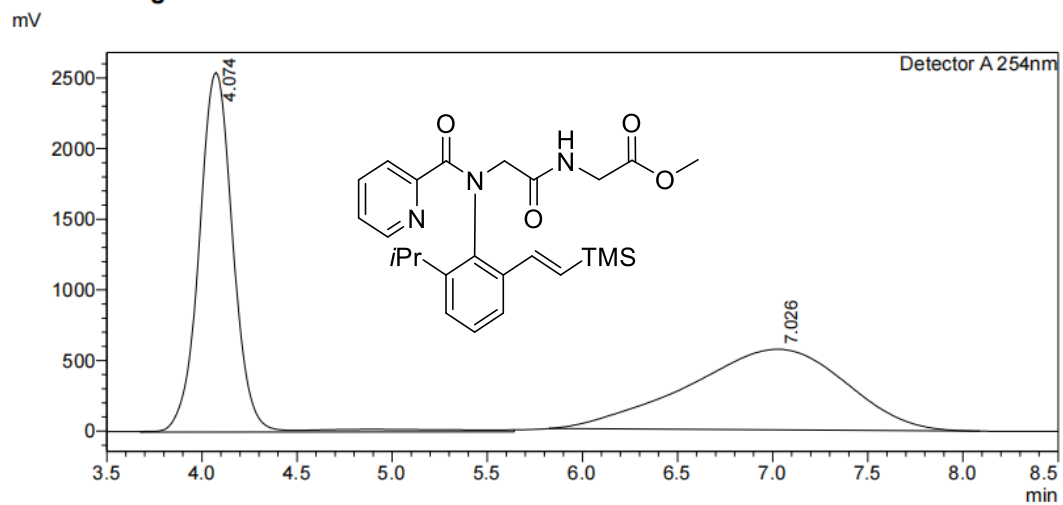

<Peak Table>

Detector A 254nm

| Peak# | Ret. Time | Area     | Height  | Conc.  | Unit | Mark | Name |
|-------|-----------|----------|---------|--------|------|------|------|
| 1     | 4.074     | 32257581 | 2544429 | 49.442 |      | M    |      |
| 2     | 7.026     | 32986083 | 571150  | 50.558 |      | M    |      |
| Total |           | 65243664 | 3115579 |        |      |      |      |
